# Supplementary material
Source: PubMed Central journal article supplement (PMC4930873)
Supplement: NIHMS796796-supplement-Fig__S1A.pdf [file NIHMS796796-supplement-Fig__S1A.pdf]

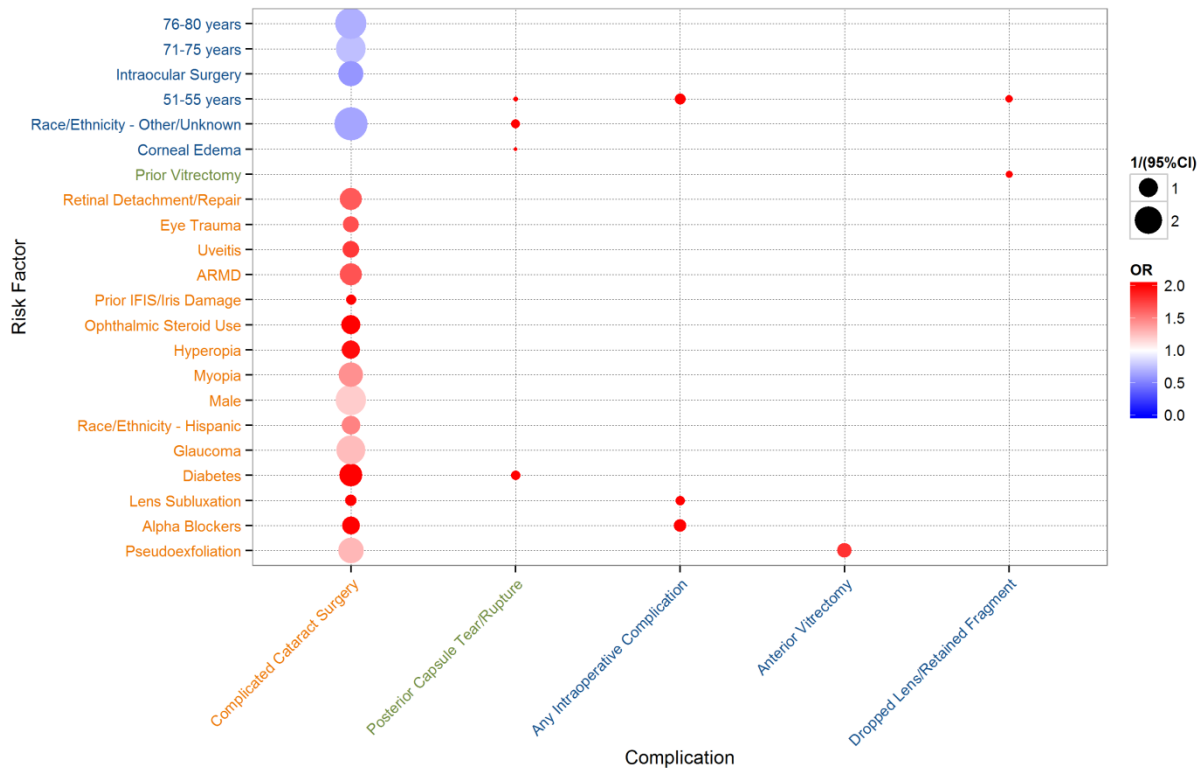

**Figure S1A – Intraoperative Complications – Multivariate Regression – Clustered (3 Groups for each axis)**

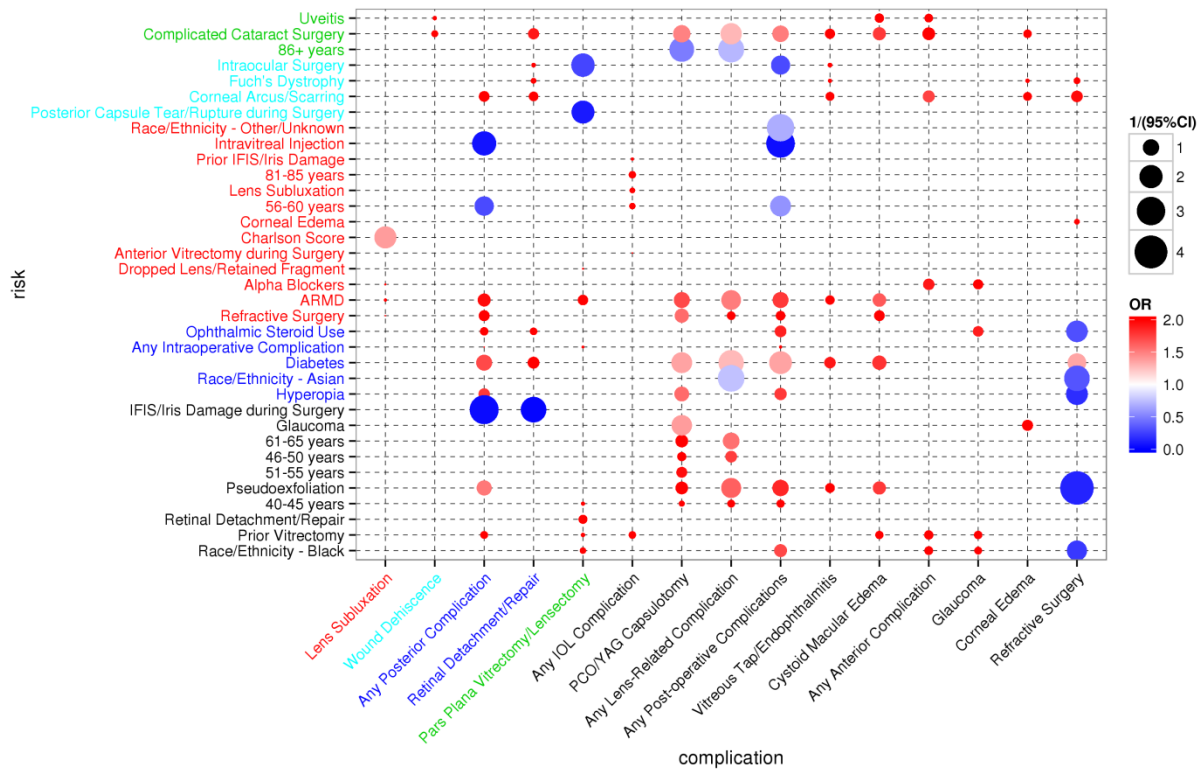

**Figure S1B – Post-operative Complications – Multivariate Analysis – Clustered (5 Groups for each axis).**
