# Supplementary material
Source: PubMed Central journal article supplement (PMC4930873)
Supplement: NIHMS796796-supplement-Table_S1.pdf [file NIHMS796796-supplement-Table_S1.pdf]

| <b>Risk Factors</b>                                    | <b>ICD-9 Code</b>                                                                                                                                                                                                                                                           | <b>CPT Code</b>                                    |
|--------------------------------------------------------|-----------------------------------------------------------------------------------------------------------------------------------------------------------------------------------------------------------------------------------------------------------------------------|----------------------------------------------------|
| Diabetes                                               | 362.0, 250.xx                                                                                                                                                                                                                                                               |                                                    |
| Glaucoma                                               | 365.0-365.4, 365.50-365.51,<br>365.53-365.59, 365.6-365.9                                                                                                                                                                                                                   | 65800, 66170, 66180                                |
| Retinal Tear/Detachment/Repair                         | 361.01-361.05, 361.31-361.33                                                                                                                                                                                                                                                | 67101, 67105, 67107, 67108,<br>67110, 67141, 67145 |
| Pseudoexfoliation                                      | 366.11, 365.52                                                                                                                                                                                                                                                              |                                                    |
| Myopia                                                 | 367.1                                                                                                                                                                                                                                                                       |                                                    |
| Alpha Blockers                                         |                                                                                                                                                                                                                                                                             |                                                    |
| Age-Related Macular Degeneration                       | 362.50-362.52                                                                                                                                                                                                                                                               |                                                    |
| Steroids                                               |                                                                                                                                                                                                                                                                             |                                                    |
| Vitrectomy                                             |                                                                                                                                                                                                                                                                             |                                                    |
| Corneal Arcus/Corneal Scarring                         | 371.0, 371.41                                                                                                                                                                                                                                                               |                                                    |
| Intraocular Surgery                                    |                                                                                                                                                                                                                                                                             | 67108, 67036, 67038-67043,<br>67112, 67113         |
| Hyperopia                                              | 367.0                                                                                                                                                                                                                                                                       |                                                    |
| Refractive Surgery                                     |                                                                                                                                                                                                                                                                             | S0800, S0810, S0596, 65771,<br>65767               |
| Intravitreal Injection                                 |                                                                                                                                                                                                                                                                             | 67028                                              |
| Uveitis/Posterior Synechiae                            | 364.00-364.05, 364.10-364.11,<br>364.21-364.24, 364.3, 364.71,<br>363.21, 360.12                                                                                                                                                                                            |                                                    |
| Nystagmus                                              | 379.5                                                                                                                                                                                                                                                                       |                                                    |
| Eye Trauma                                             | 360.50-360.55, 360.59, 360.60-<br>360.65, 260.9, 365.65, 366.20-<br>366.23, 374.86, 376.47, 376.52,<br>376.6, 918.0-918.2, 918.9, 921.0-<br>921.3, 921.9, 802.6-802.7, 870.0-<br>870.4, 870.8-870.9, 930.0-930.2,<br>930.8-930.9, 940.0-940.5, 940.9,<br>950.0-950.3, 950.9 |                                                    |
| Fuch's Dystrophy                                       | 371.57                                                                                                                                                                                                                                                                      |                                                    |
| Lens Subluxation                                       | 379.32-379.34                                                                                                                                                                                                                                                               |                                                    |
| Corneal Edema                                          | 371.20-371.24                                                                                                                                                                                                                                                               | 65766, 65750, 65756                                |
| Intraoperative Floppy Iris Syndrome (IFIS)/Iris Defect | 364.75-364.76, 364.81                                                                                                                                                                                                                                                       | 66680, 66682                                       |

**Table S1 – Codes used to define Risk Factors**
