# Supplementary material
Source: PubMed Central journal article supplement (PMC4930873)
Supplement: NIHMS796796-supplement-Table_S2.pdf [file NIHMS796796-supplement-Table_S2.pdf]

| <b>Complication</b>                              | <b>ICD-9 Code</b>                                      | <b>CPT Code</b>                                 |
|--------------------------------------------------|--------------------------------------------------------|-------------------------------------------------|
| <b>Intraoperative Complications</b>              |                                                        |                                                 |
| Complicated Surgery                              |                                                        | 66982                                           |
| Anterior Vitrectomy                              |                                                        | 67005, 67010                                    |
| Dropped Nucleus/Retained Lens Material           |                                                        | 67036, 66840, 66850, 66852                      |
| IFIS/Iris Defect                                 | 364.75-364.76, 364.81                                  | 66680, 66682                                    |
| Suprachordial Hemorrhage                         | 363.61-363.62                                          |                                                 |
| <b>Short-term Postoperative Complications</b>    |                                                        |                                                 |
|                                                  | 365.0-365.4, 365.50-365.51, 365.53-365.59, 365.6-365.9 | 65800, 66170, 66180                             |
| Glaucoma/Elevated Intraocular Pressure           |                                                        | 67101, 67105, 67107, 67108, 67110, 67141, 67145 |
| Retinal Tear/Detachment/Repair                   | 361.01-361.05, 361.31-361.33                           |                                                 |
| Pars Plana Vitrectomy/Lensectomy                 |                                                        | 66850, 67038, 67041                             |
| Vitreous Tap/Endophthalmitis                     | 360.00-360.04                                          | 67015, 67028                                    |
| Corneal Edema                                    | 371.20-371.24                                          | 65766, 65750, 65756                             |
| Wound Leak                                       | 379.99                                                 | 66999                                           |
| <b>Long-term Postoperative Complications</b>     |                                                        |                                                 |
| Posterior Capsular Opacification/YAG capsulotomy | 366.50, 366.52-366.53                                  | 66821                                           |
| Refractive Surgery                               |                                                        | S0800, S0810, S0596, 65771, 65767               |
| Cystoid Macular Edema                            | 362.53                                                 |                                                 |
| IOL extraction/Secondary IOL                     | 367.31, 996.53, 368.2                                  | 66825, 66985, 66986                             |
| IOL Dislocation/Repair                           | 379.39                                                 |                                                 |

**Table S2 – Codes used to define Complications**
