# Supplementary material
Source: PubMed Central journal article supplement (PMC4930873)
Supplement: NIHMS796796-supplement-Table_S3.pdf [file NIHMS796796-supplement-Table_S3.pdf]

| slice_id | slice_str  | cui_str    | slice_cui | slice_group | str                             |
|----------|------------|------------|-----------|-------------|---------------------------------|
| 1        | tamsulosin | tamsulosin | C0257343  | risk        | tamsulosin                      |
| 1        | tamsulosin | tamsulosin | C0257343  | risk        | tamsulosin hydrochloride        |
| 1        | tamsulosin | tamsulosin | C0257343  | risk        | tamsulosin hydrochloride 0.4 mg |
| 1        | tamsulosin | tamsulosin | C0257343  | risk        | jalyn                           |
| 1        | tamsulosin | tamsulosin | C0257343  | risk        | flomax                          |
| 1        | doxazosin  | doxazosin  | C0114873  | risk        | doxazosin                       |
| 1        | doxazosin  | doxazosin  | C0114873  | risk        | doxazosin mesylate              |
| 1        | doxazosin  | doxazosin  | C0114873  | risk        | doxazosin mesilate              |
| 1        | doxazosin  | doxazosin  | C0114873  | risk        | doxazosin 8 mg                  |
| 1        | doxazosin  | doxazosin  | C0114873  | risk        | doxazosin 4 mg                  |
| 1        | doxazosin  | doxazosin  | C0114873  | risk        | doxazosin 2 mg                  |
| 1        | doxazosin  | doxazosin  | C0114873  | risk        | doxazosin 1 mg                  |
| 1        | doxazosin  | doxazosin  | C0114873  | risk        | cardura                         |
| 1        | doxazosin  | doxazosin  | C0114873  | risk        | zoxan                           |
| 1        | doxazosin  | doxazosin  | C0114873  | risk        | cardura tablets                 |
| 1        | terazosin  | terazosin  | C0076107  | risk        | terazosin                       |
| 1        | terazosin  | terazosin  | C0076107  | risk        | terazosin hydrochloride         |
| 1        | terazosin  | terazosin  | C0076107  | risk        | terazosin 5 mg                  |
| 1        | terazosin  | terazosin  | C0076107  | risk        | terazosin 1 mg                  |
| 1        | terazosin  | terazosin  | C0076107  | risk        | terazosin 10 mg                 |
| 1        | terazosin  | terazosin  | C0076107  | risk        | terazosin 2 mg                  |
| 1        | terazosin  | terazosin  | C0076107  | risk        | terazosin 2 mg oral capsule     |
| 1        | terazosin  | terazosin  | C0076107  | risk        | hytrin                          |
| 1        | terazosin  | terazosin  | C0076107  | risk        | heitrin                         |
| 1        | terazosin  | terazosin  | C0076107  | risk        | flotrin                         |
| 1        | prazosin   | prazosin   | C0032912  | risk        | prazosin                        |
| 1        | prazosin   | prazosin   | C0032912  | risk        | furazosin                       |
| 1        | prazosin   | prazosin   | C0032912  | risk        | prazosin hcl                    |
| 1        | prazosin   | prazosin   | C0032912  | risk        | prazosin hydrochloride          |
| 1        | prazosin   | prazosin   | C0032912  | risk        | prazosin 6 mg                   |
| 1        | prazosin   | prazosin   | C0032912  | risk        | prazosin 4 mg                   |
| 1        | prazosin   | prazosin   | C0032912  | risk        | prazosin 2.5 mg                 |
| 1        | prazosin   | prazosin   | C0032912  | risk        | prazosin 0.5 mg                 |
| 1        | prazosin   | prazosin   | C0032912  | risk        | prazosin 1 mg                   |
| 1        | prazosin   | prazosin   | C0032912  | risk        | prazosin 5 mg                   |
| 1        | prazosin   | prazosin   | C0032912  | risk        | prazosin 2 mg                   |
| 1        | prazosin   | prazosin   | C0032912  | risk        | minizide 1                      |
| 1        | prazosin   | prazosin   | C0032912  | risk        | minipress                       |
| 1        | alfuzosin  | alfuzosin  | C0051150  | risk        | alfuzosin                       |
| 1        | alfuzosin  | alfuzosin  | C0051150  | risk        | alfuzosin hydrochloride         |

|   |                |                              |          |             |                                      |
|---|----------------|------------------------------|----------|-------------|--------------------------------------|
| 1 | alfuzosin      | alfuzosin                    | C0051150 | risk        | alfuzosin hydrochloride 10 mg        |
| 1 | alfuzosin      | alfuzosin                    | C0051150 | risk        | uroxatral                            |
| 1 | alfuzosin      | alfuzosin                    | C0051150 | risk        | xatral                               |
| 1 | alfuzosin      | alfuzosin                    | C0051150 | risk        | urion                                |
| 1 | alfuzosin      | alfuzosin                    | C0051150 | risk        | xatral sr                            |
| 1 | silodosin      | silodosin                    | C1870115 | risk        | silodosin                            |
| 1 | silodosin      | silodosin                    | C1870115 | risk        | silodosin 4 mg                       |
| 1 | silodosin      | silodosin                    | C1870115 | risk        | silodosin 8 mg                       |
| 1 | silodosin      | silodosin                    | C1870115 | risk        | rapaflo                              |
| 1 | alpha blockers | adrenergic alpha-antagonists | C0001641 | "risk"      | alpha blocker                        |
| 1 | alpha blockers | adrenergic alpha-antagonists | C0001641 | "risk"      | alpha-adrenergic blockers            |
| 1 | alpha blockers | adrenergic alpha-antagonists | C0001641 | "risk"      | alpha-adrenergic blocking agent      |
| 1 | alpha blockers | adrenergic alpha-antagonists | C0001641 | "risk"      | alpha-adrenergic blocker             |
| 1 | alpha blockers | adrenergic alpha-antagonists | C0001641 | "risk"      | alpha-adrenergic blocking agents     |
| 1 | alpha blockers | adrenergic alpha-antagonists | C0001641 | "risk"      | alpha adrenergic blockers            |
| 1 | alpha blockers | adrenergic alpha-antagonists | C0001641 | "risk"      | alpha-blocker                        |
| 1 | alpha blockers | adrenergic alpha-antagonists | C0001641 | "risk"      | alpha-adrenergic antagonist          |
| 2 | fuch           | fuchs endothelial dystrophy  | C0016781 | risk        | fuchs endothelial dystrophy          |
| 2 | fuch           | fuchs endothelial dystrophy  | C0016781 | risk        | fuch's endothelial dystrophy         |
| 2 | fuch           | fuchs endothelial dystrophy  | C0016781 | risk        | fuchs' endothelial dystrophy         |
| 2 | fuch           | fuchs endothelial dystrophy  | C0016781 | risk        | fuchs' dystrophy                     |
| 2 | fuch           | fuchs endothelial dystrophy  | C0016781 | risk        | fuchs' corneal dystrophy             |
| 2 | fuch           | fuchs endothelial dystrophy  | C0016781 | risk        | fuch endothelial dystrophy           |
| 2 | fuch           | fuchs endothelial dystrophy  | C0016781 | risk        | fuch's endothelial corneal dystrophy |
| 2 | guttae         | corneal guttata              | C0271288 | "risk"      | corneal guttata                      |
| 2 | guttae         | corneal guttata              | C0271288 | "risk"      | cornea guttata                       |
| 3 | corneal edema  | corneal edema                | C0010037 | risk/postop | corneal edema                        |
| 3 | corneal edema  | corneal edema                | C0010037 | risk/postop | edema, corneal                       |
| 3 | corneal edema  | corneal edema                | C0010037 | risk/postop | unspecified corneal edema            |
| 3 | corneal edema  | corneal edema                | C0010037 | risk/postop | secondary corneal edema              |
| 3 | corneal edema  | corneal edema                | C0010037 | risk/postop | bullous keratopathy                  |
| 3 | corneal edema  | corneal edema                | C0010037 | risk/postop | microcytic edema                     |
| 3 | corneal edema  | corneal edema                | C0010037 | risk/postop | microcystic corneal edema            |
| 3 | corneal edema  | corneal edema                | C0010037 | risk/postop | edema, microcystic                   |
| 4 | uveitis        | uveitis                      | C0042164 | risk/postop | hypopyon                             |
| 4 | uveitis        | uveitis                      | C0042164 | risk        | posner-schlossman syndrome           |

|   |         |         |          |      |                                                           |
|---|---------|---------|----------|------|-----------------------------------------------------------|
| 4 | uveitis | uveitis | C0042164 | risk | glaucomatocyclitic crisis                                 |
| 4 | uveitis | uveitis | C0042164 | risk | sympathetic uveitis                                       |
| 4 | uveitis | uveitis | C0042164 | risk | panuveitis                                                |
| 4 | uveitis | uveitis | C0042164 | risk | diffuse uveitis                                           |
| 4 | uveitis | uveitis | C0042164 | risk | anterior uveitis                                          |
| 4 | uveitis | uveitis | C0042164 | risk | uveitis, anterior                                         |
| 4 | uveitis | uveitis | C0042164 | risk | posterior uveitis                                         |
| 4 | uveitis | uveitis | C0042164 | risk | uveitis, posterior                                        |
| 4 | uveitis | uveitis | C0042164 | risk | primary iridocyclitis                                     |
| 4 | uveitis | uveitis | C0042164 | risk | chronic iritis                                            |
| 4 | uveitis | uveitis | C0042164 | risk | chronic anterior uveitis                                  |
| 4 | uveitis | uveitis | C0042164 | risk | herpes zoster iridocyclitis                               |
| 4 | uveitis | uveitis | C0042164 | risk | toxoplasma chorioretinitis                                |
| 4 | uveitis | uveitis | C0042164 | risk | toxoplasmosis chorioretinitis                             |
| 4 | uveitis | uveitis | C0042164 | risk | apmppe                                                    |
| 4 | uveitis | uveitis | C0042164 | risk | acute posterior multifocal placoid pigment epitheliopathy |
| 4 | uveitis | uveitis | C0042164 | risk | acute multifocal placoid pigment epitheliopathy           |
| 4 | uveitis | uveitis | C0042164 | risk | unspecified acute and subacute iridocyclitis              |
| 4 | uveitis | uveitis | C0042164 | risk | acute and subacute iridocyclitis                          |
| 4 | uveitis | uveitis | C0042164 | risk | recurrent iridocyclitis                                   |
| 4 | uveitis | uveitis | C0042164 | risk | focal choroiditis                                         |
| 4 | uveitis | uveitis | C0042164 | risk | disseminated choroiditis                                  |
| 4 | uveitis | uveitis | C0042164 | risk | subacute iridocyclitis                                    |
| 4 | uveitis | uveitis | C0042164 | risk | acute iritis                                              |
| 4 | uveitis | uveitis | C0042164 | risk | subacute iritis                                           |
| 4 | uveitis | uveitis | C0042164 | risk | herpetic iritis                                           |
| 4 | uveitis | uveitis | C0042164 | risk | idiopathic anterior uveitis                               |
| 4 | uveitis | uveitis | C0042164 | risk | birdshot retinochoroidopathy                              |
| 4 | uveitis | uveitis | C0042164 | risk | birdshot chorioretinitis                                  |
| 4 | uveitis | uveitis | C0042164 | risk | fungal choroiditis                                        |
| 4 | uveitis | uveitis | C0042164 | risk | granulomatous choroiditis                                 |
| 4 | uveitis | uveitis | C0042164 | risk | acute anterior uveitis                                    |
| 4 | uveitis | uveitis | C0042164 | risk | serpiginous choroiditis                                   |
| 4 | uveitis | uveitis | C0042164 | risk | serpiginous choroidopathy                                 |
| 4 | uveitis | uveitis | C0042164 | risk | punctate inner choroidopathy                              |
| 4 | uveitis | uveitis | C0042164 | risk | mewds                                                     |
| 4 | uveitis | uveitis | C0042164 | risk | multiple evanescent white dot syndrome                    |
| 4 | uveitis | uveitis | C0042164 | risk | traumatic iritis                                          |
| 4 | uveitis | uveitis | C0042164 | risk | iritis with inflammatory bowel                            |

|   |         |                       |          |             |                                              |
|---|---------|-----------------------|----------|-------------|----------------------------------------------|
|   |         |                       |          |             | disease                                      |
| 4 | uveitis | uveitis               | C0042164 | risk        | retinochoroidopathy                          |
| 4 | uveitis | uveitis               | C0042164 | risk        | immune recovery uveitis                      |
| 4 | uveitis | uveitis               | C0042164 | risk        | herpetic iridocyclitis                       |
| 4 | uveitis | uveitis               | C0042164 | risk        | pars planitis                                |
| 4 | uveitis | uveitis               | C0042164 | risk        | uveitis                                      |
| 4 | uveitis | uveitis               | C0042164 | risk        | intraocular inflammation                     |
| 4 | uveitis | uveitis               | C0042164 | risk        | uveitides                                    |
| 4 | uveitis | uveitis               | C0042164 | risk        | uveitis nos                                  |
| 4 | uveitis | uveitis               | C0042164 | risk        | intermediate uveitis                         |
| 4 | uveitis | uveitis               | C0042164 | risk        | uveitis, intermediate                        |
| 4 | uveitis | uveitis               | C0042164 | risk        | peripheral uveitis                           |
| 4 | uveitis | uveitis               | C0042164 | risk        | sclerouveitis                                |
| 4 | uveitis | uveitis               | C0042164 | risk        | tuberculous uveitis                          |
| 4 | uveitis | uveitis               | C0042164 | risk        | keratouveitis                                |
| 4 | uveitis | uveitis               | C0042164 | risk        | drug-induced uveitis                         |
| 4 | uveitis | uveitis               | C0042164 | risk        | chronic uveitis                              |
| 4 | uveitis | uveitis               | C0042164 | risk        | panophthalmitis                              |
| 4 | uveitis | anterior uveitis      | C0042165 | risk/postop | hypopyon                                     |
| 4 | uveitis | anterior uveitis      | C0042165 | risk        | posner-schlossman syndrome                   |
| 4 | uveitis | anterior uveitis      | C0042165 | risk        | glaucomatocyclitic crisis                    |
| 4 | uveitis | anterior uveitis      | C0042165 | risk        | anterior uveitis                             |
| 4 | uveitis | anterior uveitis      | C0042165 | risk        | uveitis, anterior                            |
| 4 | uveitis | anterior uveitis      | C0042165 | risk        | primary iridocyclitis                        |
| 4 | uveitis | anterior uveitis      | C0042165 | risk        | chronic iritis                               |
| 4 | uveitis | anterior uveitis      | C0042165 | risk        | chronic anterior uveitis                     |
| 4 | uveitis | anterior uveitis      | C0042165 | risk        | herpes zoster iridocyclitis                  |
| 4 | uveitis | anterior uveitis      | C0042165 | risk        | unspecified acute and subacute iridocyclitis |
| 4 | uveitis | anterior uveitis      | C0042165 | risk        | acute and subacute iridocyclitis             |
| 4 | uveitis | anterior uveitis      | C0042165 | risk        | recurrent iridocyclitis                      |
| 4 | uveitis | anterior uveitis      | C0042165 | risk        | subacute iridocyclitis                       |
| 4 | uveitis | anterior uveitis      | C0042165 | risk        | acute iritis                                 |
| 4 | uveitis | anterior uveitis      | C0042165 | risk        | subacute iritis                              |
| 4 | uveitis | anterior uveitis      | C0042165 | risk        | herpetic iritis                              |
| 4 | uveitis | anterior uveitis      | C0042165 | risk        | idiopathic anterior uveitis                  |
| 4 | uveitis | anterior uveitis      | C0042165 | risk        | acute anterior uveitis                       |
| 4 | uveitis | anterior uveitis      | C0042165 | risk        | iritis with inflammatory bowel disease       |
| 4 | uveitis | anterior uveitis      | C0042165 | risk        | herpetic iridocyclitis                       |
| 4 | uveitis | uveitis, intermediate | C0042166 | risk        | pars planitis                                |
| 4 | uveitis | uveitis, intermediate | C0042166 | risk        | intermediate uveitis                         |

|   |               |                       |          |      |                                                           |
|---|---------------|-----------------------|----------|------|-----------------------------------------------------------|
| 4 | uveitis       | uveitis, intermediate | C0042166 | risk | uveitis, intermediate                                     |
| 4 | uveitis       | uveitis, intermediate | C0042166 | risk | peripheral uveitis                                        |
| 4 | uveitis       | uveitis, posterior    | C0042167 | risk | posterior uveitis                                         |
| 4 | uveitis       | uveitis, posterior    | C0042167 | risk | uveitis, posterior                                        |
| 4 | uveitis       | uveitis, posterior    | C0042167 | risk | toxoplasma chorioretinitis                                |
| 4 | uveitis       | uveitis, posterior    | C0042167 | risk | toxoplasmosis chorioretinitis                             |
| 4 | uveitis       | uveitis, posterior    | C0042167 | risk | apmppe                                                    |
| 4 | uveitis       | uveitis, posterior    | C0042167 | risk | acute posterior multifocal placoid pigment epitheliopathy |
| 4 | uveitis       | uveitis, posterior    | C0042167 | risk | acute multifocal placoid pigment epitheliopathy           |
| 4 | uveitis       | uveitis, posterior    | C0042167 | risk | focal choroiditis                                         |
| 4 | uveitis       | uveitis, posterior    | C0042167 | risk | disseminated choroiditis                                  |
| 4 | uveitis       | uveitis, posterior    | C0042167 | risk | birdshot retinochoroidopathy                              |
| 4 | uveitis       | uveitis, posterior    | C0042167 | risk | birdshot chorioretinitis                                  |
| 4 | uveitis       | uveitis, posterior    | C0042167 | risk | granulomatous choroiditis                                 |
| 4 | uveitis       | uveitis, posterior    | C0042167 | risk | serpiginous choroiditis                                   |
| 4 | uveitis       | uveitis, posterior    | C0042167 | risk | serpiginous choroidopathy                                 |
| 4 | uveitis       | uveitis, posterior    | C0042167 | risk | punctate inner choroidopathy                              |
| 4 | uveitis       | uveitis, posterior    | C0042167 | risk | mewds                                                     |
| 4 | uveitis       | uveitis, posterior    | C0042167 | risk | multiple evanescent white dot syndrome                    |
| 4 | uveitis       | uveitis, posterior    | C0042167 | risk | retinochoroidopathy                                       |
| 4 | iridocyclitis | iridocyclitis         | C0022073 | risk | iridocyclitis                                             |
| 4 | iridocyclitis | iridocyclitis         | C0022073 | risk | heterochromic cyclitis                                    |
| 4 | iridocyclitis | iridocyclitis         | C0022073 | risk | herpes zoster iridocyclitis                               |
| 4 | iridocyclitis | iridocyclitis         | C0022073 | risk | unspecified acute and subacute iridocyclitis              |
| 4 | iridocyclitis | iridocyclitis         | C0022073 | risk | acute and subacute iridocyclitis                          |
| 4 | iridocyclitis | iridocyclitis         | C0022073 | risk | recurrent iridocyclitis                                   |
| 4 | iridocyclitis | iridocyclitis         | C0022073 | risk | subacute iridocyclitis                                    |
| 4 | iridocyclitis | iridocyclitis         | C0022073 | risk | subacute iritis                                           |
| 4 | iridocyclitis | iridocyclitis         | C0022073 | risk | herpetic iridocyclitis                                    |
| 4 | iritis        | iritis                | C0022081 | risk | iritis                                                    |
| 4 | iritis        | iritis                | C0022081 | risk | herpes zoster iridocyclitis                               |
| 4 | iritis        | iritis                | C0022081 | risk | unspecified acute and subacute iridocyclitis              |
| 4 | iritis        | iritis                | C0022081 | risk | acute and subacute iridocyclitis                          |
| 4 | iritis        | iritis                | C0022081 | risk | recurrent iridocyclitis                                   |
| 4 | iritis        | iritis                | C0022081 | risk | subacute iridocyclitis                                    |
| 4 | iritis        | iritis                | C0022081 | risk | acute iritis                                              |
| 4 | iritis        | iritis                | C0022081 | risk | subacute iritis                                           |
| 4 | iritis        | iritis                | C0022081 | risk | herpetic iritis                                           |

|   |             |                   |          |      |                                        |
|---|-------------|-------------------|----------|------|----------------------------------------|
| 4 | iritis      | iritis            | C0022081 | risk | iritis with inflammatory bowel disease |
| 4 | iritis      | iritis            | C0022081 | risk | herpetic iridocyclitis                 |
| 4 | syn of iris | adhesions of iris | C0154933 | risk | iris adhesions                         |
| 4 | syn of iris | adhesions of iris | C0154933 | risk | iris synechiae                         |
| 4 | syn of iris | adhesions of iris | C0154933 | risk | anterior synechiae                     |
| 4 | syn of iris | adhesions of iris | C0154933 | risk | posterior synechiae                    |
| 4 | syn of iris | adhesions of iris | C0154933 | risk | peripheral anterior synechiae          |
| 4 | syn of iris | adhesions of iris | C0154933 | risk | secluded pupil                         |
| 4 | syn of iris | adhesions of iris | C0154933 | risk | pupillary seclusion                    |
| 5 | eye trauma  | eye injuries      | C0015408 | risk | corneal burns                          |
| 5 | eye trauma  | eye injuries      | C0015408 | risk | corneal burn                           |
| 5 | eye trauma  | eye injuries      | C0015408 | risk | burn, corneal                          |
| 5 | eye trauma  | eye injuries      | C0015408 | risk | eyelid burns                           |
| 5 | eye trauma  | eye injuries      | C0015408 | risk | foreign body in eye                    |
| 5 | eye trauma  | eye injuries      | C0015408 | risk | foreign body, eye                      |
| 5 | eye trauma  | eye injuries      | C0015408 | risk | intralesional foreign body             |
| 5 | eye trauma  | eye injuries      | C0015408 | risk | corneal foreign body                   |
| 5 | eye trauma  | eye injuries      | C0015408 | risk | corneal rust ring                      |
| 5 | eye trauma  | eye injuries      | C0015408 | risk | eye injury                             |
| 5 | eye trauma  | eye injuries      | C0015408 | risk | ocular injury                          |
| 5 | eye trauma  | eye injuries      | C0015408 | risk | ocular injuries                        |
| 5 | eye trauma  | eye injuries      | C0015408 | risk | injury, eye                            |
| 5 | eye trauma  | eye injuries      | C0015408 | risk | eye injuries                           |
| 5 | eye trauma  | eye injuries      | C0015408 | risk | penetrating eye injury                 |
| 5 | eye trauma  | eye injuries      | C0015408 | risk | ocular penetration                     |
| 5 | eye trauma  | eye injuries      | C0015408 | risk | eye penetration                        |
| 5 | eye trauma  | eye injuries      | C0015408 | risk | traumatic cataract                     |
| 5 | eye trauma  | eye injuries      | C0015408 | risk | optic nerve injury                     |
| 5 | eye trauma  | eye injuries      | C0015408 | risk | traumatic optic neuropathy             |
| 5 | eye trauma  | eye injuries      | C0015408 | risk | optic nerve trauma                     |
| 5 | eye trauma  | eye injuries      | C0015408 | risk | injury, optic nerve                    |
| 5 | eye trauma  | eye injuries      | C0015408 | risk | optic nerve injuries                   |
| 5 | eye trauma  | eye injuries      | C0015408 | risk | traumatic optic nerve injury           |
| 5 | eye trauma  | eye injuries      | C0015408 | risk | traumatic blindness                    |
| 5 | eye trauma  | eye injuries      | C0015408 | risk | traumatic enophthalmos                 |
| 5 | eye trauma  | eye injuries      | C0015408 | risk | conjunctival injury                    |
| 5 | eye trauma  | eye injuries      | C0015408 | risk | corneal injury                         |
| 5 | eye trauma  | eye injuries      | C0015408 | risk | corneal injuries                       |
| 5 | eye trauma  | eye injuries      | C0015408 | risk | injury of cornea                       |
| 5 | eye trauma  | eye injuries      | C0015408 | risk | retinal injury                         |
| 5 | eye trauma  | eye injuries      | C0015408 | risk | chemical eye injury                    |

|   |                            |                                      |          |             |                                   |
|---|----------------------------|--------------------------------------|----------|-------------|-----------------------------------|
| 5 | eye trauma                 | eye injuries                         | C0015408 | risk        | iris injury                       |
| 5 | eye trauma                 | eye injuries                         | C0015408 | risk        | keratorhexis                      |
| 5 | eye trauma                 | eye injuries                         | C0015408 | risk        | ocular toxicity                   |
| 5 | eye trauma                 | eye injuries                         | C0015408 | risk        | prolapse of uvea                  |
| 5 | eye trauma                 | eye injuries                         | C0015408 | risk        | capsular block syndrome           |
| 5 | eye trauma                 | eye injuries                         | C0015408 | risk        | superficial injury of cornea      |
| 5 | eye trauma                 | eye injuries                         | C0015408 | risk        | total traumatic cataract          |
| 5 | eye trauma                 | eye injuries                         | C0015408 | risk        | comotio retinae                   |
| 5 | eye trauma                 | eye injuries                         | C0015408 | risk        | berlin's edema                    |
| 5 | eye trauma                 | eye injuries                         | C0015408 | risk        | optic nerve avulsion              |
| 5 | eye trauma                 | eye injuries                         | C0015408 | risk        | full thickness eyelid laceration  |
| 5 | eye trauma                 | eye injuries                         | C0015408 | risk        | corneoscleral perforation         |
| 5 | eye trauma                 | eye injuries                         | C0015408 | risk        | partial thickness corneal wound   |
| 5 | eye trauma                 | eye injuries                         | C0015408 | risk        | traumatic retinopathy             |
| 5 | eye trauma                 | eye injuries                         | C0015408 | risk        | purtscher's retinopathy           |
| 5 | eye trauma                 | eye injuries                         | C0015408 | risk        | corneal laceration                |
| 5 | eye trauma                 | eye injuries                         | C0015408 | risk        | traumatic corneal abrasion        |
| 5 | eye trauma                 | eye injuries                         | C0015408 | risk        | corneoscleral laceration          |
| 5 | eye trauma                 | eye injuries                         | C0015408 | risk        | laceration of skin of eyelid      |
| 6 | lens<br>sublux/dislocation | lens dislocation                     | C0023309 | risk/postop | lens dislocation                  |
| 6 | lens<br>sublux/dislocation | lens dislocation                     | C0023309 | risk/postop | dislocated lenses                 |
| 6 | lens<br>sublux/dislocation | lens dislocation                     | C0023309 | risk/postop | lens dislocations                 |
| 6 | lens<br>sublux/dislocation | lens dislocation                     | C0023309 | risk/postop | dislocated lens                   |
| 6 | lens<br>sublux/dislocation | lens dislocation                     | C0023309 | risk/postop | dislocation of lens               |
| 6 | lens<br>sublux/dislocation | lens dislocation                     | C0023309 | risk/postop | dislocations, lens                |
| 6 | lens<br>sublux/dislocation | lens dislocation                     | C0023309 | risk/postop | dislocation, lens                 |
| 6 | lens<br>sublux/dislocation | lens subluxation                     | C0023316 | risk/postop | lens subluxation                  |
| 6 | lens<br>sublux/dislocation | lens subluxation                     | C0023316 | risk/postop | lens subluxations                 |
| 6 | lens<br>sublux/dislocation | lens subluxation                     | C0023316 | risk/postop | subluxation of lens               |
| 7 | pex                        | pseudoexfoliation of lens<br>capsule | C0311341 | risk        | pseudoexfol lens capsule          |
| 7 | pex                        | pseudoexfoliation of lens<br>capsule | C0311341 | risk        | pseudoexfoliation of lens capsule |
| 7 | pex                        | exfoliation syndrome                 | C0206368 | risk        | pseudoexfoliation syndrome        |
| 7 | pex                        | exfoliation syndrome                 | C0206368 | risk        | pseudoexfoliation glaucoma        |
| 7 | pex                        | exfoliation syndrome                 | C0206368 | risk        | pseudoexfoliation of the lens     |

|    |                  |                      |          |             |                                            |
|----|------------------|----------------------|----------|-------------|--------------------------------------------|
| 7  | pex              | exfoliation syndrome | C0206368 | risk        | pseudo-exfoliation syndrome                |
| 8  | corneal arcus    | arcus senilis        | C0003742 | risk        | arcus senilis                              |
| 8  | corneal arcus    | arcus senilis        | C0003742 | risk        | corneal arcus                              |
| 8  | corneal arcus    | arcus senilis        | C0003742 | risk        | arcus corneae                              |
| 8  | corneal arcus    | arcus senilis        | C0003742 | risk        | arcus of cornea                            |
| 9  | corneal scarring | corneal scar         | C0349702 | risk        | corneal scar                               |
| 9  | corneal scarring | corneal scar         | C0349702 | risk        | corneal scarring                           |
| 9  | corneal scarring | corneal scar         | C0349702 | risk        | scar, corneal                              |
| 9  | corneal scarring | corneal scar         | C0349702 | risk        | corneal scars and opacities                |
| 10 | glaucoma-all     | glaucoma             | C0017601 | risk/postop | glaucoma                                   |
| 10 | glaucoma-all     | glaucoma             | C0017601 | risk/postop | unspecified glaucoma                       |
| 10 | glaucoma-all     | glaucoma             | C0017601 | risk/postop | glaucomas                                  |
| 10 | glaucoma-all     | glaucoma             | C0017601 | risk/postop | glaucoma, unspecified                      |
| 10 | glaucoma-all     | glaucoma             | C0017601 | risk/postop | narrow angle glaucoma                      |
| 10 | glaucoma-all     | glaucoma             | C0017601 | risk/postop | angle closure glaucoma                     |
| 10 | glaucoma-all     | glaucoma             | C0017601 | risk/postop | narrow-angle glaucoma                      |
| 10 | glaucoma-all     | glaucoma             | C0017601 | risk/postop | angle-closure glaucoma                     |
| 10 | glaucoma-all     | glaucoma             | C0017601 | risk/postop | closed angle glaucoma                      |
| 10 | glaucoma-all     | glaucoma             | C0017601 | risk/postop | closed-angle glaucoma                      |
| 10 | glaucoma-all     | glaucoma             | C0017601 | risk/postop | narrow-angle glaucomas                     |
| 10 | glaucoma-all     | glaucoma             | C0017601 | risk/postop | glaucoma, narrow angle                     |
| 10 | glaucoma-all     | glaucoma             | C0017601 | risk/postop | glaucoma, narrow-angle                     |
| 10 | glaucoma-all     | glaucoma             | C0017601 | risk/postop | glaucoma, closed angle                     |
| 10 | glaucoma-all     | glaucoma             | C0017601 | risk/postop | unspecified primary angle-closure glaucoma |
| 10 | glaucoma-all     | glaucoma             | C0017601 | risk/postop | primary angle-closure glaucoma             |
| 10 | glaucoma-all     | glaucoma             | C0017601 | risk/postop | neovascular glaucoma                       |
| 10 | glaucoma-all     | glaucoma             | C0017601 | risk/postop | glaucoma, neovascular                      |
| 10 | glaucoma-all     | glaucoma             | C0017601 | risk/postop | open-angle glaucoma                        |
| 10 | glaucoma-all     | glaucoma             | C0017601 | risk/postop | open angle glaucoma                        |
| 10 | glaucoma-all     | glaucoma             | C0017601 | risk/postop | pigmentary glaucoma                        |
| 10 | glaucoma-all     | glaucoma             | C0017601 | risk/postop | wide-angle glaucoma                        |
| 10 | glaucoma-all     | glaucoma             | C0017601 | risk/postop | glaucoma, open angle                       |
| 10 | glaucoma-all     | glaucoma             | C0017601 | risk/postop | glaucomas, open-angle                      |
| 10 | glaucoma-all     | glaucoma             | C0017601 | risk/postop | glaucoma simplex                           |
| 10 | glaucoma-all     | glaucoma             | C0017601 | risk/postop | glaucoma, open-angle                       |
| 10 | glaucoma-all     | glaucoma             | C0017601 | risk/postop | unspecified open-angle glaucoma            |
| 10 | glaucoma-all     | glaucoma             | C0017601 | risk/postop | congenital glaucoma                        |
| 10 | glaucoma-all     | glaucoma             | C0017601 | risk/postop | buphthalmos                                |
| 10 | glaucoma-all     | glaucoma             | C0017601 | risk/postop | infantile glaucoma                         |
| 10 | glaucoma-all     | glaucoma             | C0017601 | risk/postop | buphthalmus                                |
| 10 | glaucoma-all     | glaucoma             | C0017601 | risk/postop | glaucoma, congenital                       |



|    |              |          |          |             |                                              |
|----|--------------|----------|----------|-------------|----------------------------------------------|
| 10 | glaucoma-all | glaucoma | C0017601 | risk/postop | developmental glaucoma                       |
| 10 | glaucoma-all | glaucoma | C0017601 | risk/postop | hydrophthalmos                               |
| 10 | glaucoma-all | glaucoma | C0017601 | risk/postop | glaucoma of childhood                        |
| 10 | glaucoma-all | glaucoma | C0017601 | risk/postop | buphthalmia                                  |
| 10 | glaucoma-all | glaucoma | C0017601 | risk/postop | ocular hypertension                          |
| 10 | glaucoma-all | glaucoma | C0017601 | risk/postop | hypertension, ocular                         |
| 10 | glaucoma-all | glaucoma | C0017601 | risk/postop | normal tension glaucoma                      |
| 10 | glaucoma-all | glaucoma | C0017601 | risk/postop | low tension glaucoma                         |
| 10 | glaucoma-all | glaucoma | C0017601 | risk/postop | normal pressure glaucoma                     |
| 10 | glaucoma-all | glaucoma | C0017601 | risk/postop | glaucoma, normal tension                     |
| 10 | glaucoma-all | glaucoma | C0017601 | risk/postop | low-tension glaucoma                         |
| 10 | glaucoma-all | glaucoma | C0017601 | risk/postop | phacolytic glaucoma                          |
| 10 | glaucoma-all | glaucoma | C0017601 | risk/postop | anatomical narrow angle                      |
| 10 | glaucoma-all | glaucoma | C0017601 | risk/postop | acute angle closure glaucoma                 |
| 10 | glaucoma-all | glaucoma | C0017601 | risk/postop | acute angle-closure glaucoma                 |
| 10 | glaucoma-all | glaucoma | C0017601 | risk/postop | acute closed-angle glaucoma                  |
| 10 | glaucoma-all | glaucoma | C0017601 | risk/postop | chronic angle-closure glaucoma               |
| 10 | glaucoma-all | glaucoma | C0017601 | risk/postop | anatomical narrow angle glaucoma             |
| 10 | glaucoma-all | glaucoma | C0017601 | risk/postop | pseudoexfoliation syndrome                   |
| 10 | glaucoma-all | glaucoma | C0017601 | risk/postop | exfoliation syndrome                         |
| 10 | glaucoma-all | glaucoma | C0017601 | risk/postop | pseudoexfoliation glaucoma                   |
| 10 | glaucoma-all | glaucoma | C0017601 | risk/postop | pseudoexfoliation of the lens                |
| 10 | glaucoma-all | glaucoma | C0017601 | risk/postop | exfoliation glaucoma                         |
| 10 | glaucoma-all | glaucoma | C0017601 | risk/postop | pseudo-exfoliation syndrome                  |
| 10 | glaucoma-all | glaucoma | C0017601 | risk/postop | glaucomatous optic atrophy                   |
| 10 | glaucoma-all | glaucoma | C0017601 | risk/postop | glaucomatous atrophy (cupping) of optic disc |
| 10 | glaucoma-all | glaucoma | C0017601 | risk/postop | glaucomatous atrophy of optic disc           |
| 10 | glaucoma-all | glaucoma | C0017601 | risk/postop | steroid responders                           |
| 10 | glaucoma-all | glaucoma | C0017601 | risk/postop | primary open-angle glaucoma                  |
| 10 | glaucoma-all | glaucoma | C0017601 | risk/postop | primary open angle glaucoma                  |
| 10 | glaucoma-all | glaucoma | C0017601 | risk/postop | poag                                         |
| 10 | glaucoma-all | glaucoma | C0017601 | risk/postop | glaucoma, primary open angle                 |
| 10 | glaucoma-all | glaucoma | C0017601 | risk/postop | steroid-induced glaucoma                     |
| 10 | glaucoma-all | glaucoma | C0017601 | risk/postop | traumatic glaucoma                           |
| 10 | glaucoma-all | glaucoma | C0017601 | risk/postop | preglaucoma                                  |
| 10 | glaucoma-all | glaucoma | C0017601 | risk/postop | preglaucoma nos                              |
| 10 | glaucoma-all | glaucoma | C0017601 | risk/postop | aqueous misdirection                         |
| 10 | glaucoma-all | glaucoma | C0017601 | risk/postop | secondary glaucoma                           |
| 10 | glaucoma-all | glaucoma | C0017601 | risk/postop | glaucoma secondary                           |
| 10 | glaucoma-all | glaucoma | C0017601 | risk/postop | absolute glaucoma                            |
| 10 | glaucoma-all | glaucoma | C0017601 | risk/postop | glaucoma associated with lens                |

|    |               |                      |          |             |                                               |
|----|---------------|----------------------|----------|-------------|-----------------------------------------------|
|    |               |                      |          |             | disorder                                      |
| 10 | glaucoma-all  | glaucoma             | C0017601 | risk/postop | phacogenic glaucoma                           |
| 10 | glaucoma-all  | glaucoma             | C0017601 | risk/postop | secondary open-angle glaucoma                 |
| 10 | glaucoma-all  | glaucoma             | C0017601 | risk/postop | secondary angle-closure glaucoma              |
| 10 | glaucoma-all  | glaucoma             | C0017601 | risk/postop | malignant glaucoma                            |
| 10 | glaucoma-all  | glaucoma             | C0017601 | risk/postop | aphakic glaucoma                              |
| 10 | glaucoma-all  | glaucoma             | C0017601 | risk/postop | advanced open-angle glaucoma                  |
| 10 | glaucoma-all  | glaucoma             | C0017601 | risk/postop | angle recession glaucoma                      |
| 10 | glaucoma-all  | glaucoma             | C0017601 | risk/postop | plateau iris                                  |
| 10 | glaucoma-all  | glaucoma             | C0017601 | risk/postop | combined mechanism glaucoma                   |
| 10 | glaucoma-all  | glaucoma             | C0017601 | risk/postop | mixed mechanism glaucoma                      |
| 10 | glaucoma-all  | glaucoma             | C0017601 | risk/postop | phacomorphic glaucoma                         |
| 10 | glaucoma-all  | glaucoma             | C0017601 | risk/postop | ghost cell glaucoma                           |
| 10 | glaucoma-all  | glaucoma             | C0017601 | risk/postop | glaucoma associated with ocular inflammation  |
| 10 | glaucoma-all  | glaucoma             | C0017601 | risk/postop | glaucoma associated with ocular inflammations |
| 10 | glaucoma-all  | glaucoma             | C0017601 | risk/postop | glaucoma following surgery                    |
| 10 | glaucoma-all  | glaucoma             | C0017601 | risk/postop | chronic angle closure glaucoma                |
| 10 | glaucoma-all  | glaucoma             | C0017601 | risk/postop | uveitic glaucoma                              |
| 10 | glaucoma-all  | glaucoma             | C0017601 | risk/postop | glaucoma due to silicon oil                   |
| 10 | glaucoma-all  | glaucoma             | C0017601 | risk/postop | lens particle glaucoma                        |
| 10 | glaucoma-all  | glaucoma             | C0017601 | risk/postop | primary congenital glaucoma                   |
| 10 | glaucoma-all  | glaucoma             | C0017601 | risk/postop | infantile glaucoma                            |
| 10 | glaucoma-all  | glaucoma             | C0017601 | risk/postop | juvenile glaucoma                             |
| 10 | glaucoma-all  | glaucoma             | C0017601 | risk/postop | developmental glaucoma                        |
| 10 | glaucoma-all  | glaucoma             | C0017601 | risk/postop | glaucoma of childhood                         |
| 11 | glaucoma-open | glaucoma, open-angle | C0017612 | risk/postop | open-angle glaucoma                           |
| 11 | glaucoma-open | glaucoma, open-angle | C0017612 | risk/postop | open angle glaucoma                           |
| 11 | glaucoma-open | glaucoma, open-angle | C0017612 | risk/postop | wide-angle glaucoma                           |
| 11 | glaucoma-open | glaucoma, open-angle | C0017612 | risk/postop | glaucoma, open angle                          |
| 11 | glaucoma-open | glaucoma, open-angle | C0017612 | risk/postop | glaucomas, open-angle                         |
| 11 | glaucoma-open | glaucoma, open-angle | C0017612 | risk/postop | glaucoma simplex                              |
| 11 | glaucoma-open | glaucoma, open-angle | C0017612 | risk/postop | glaucoma, open-angle                          |
| 11 | glaucoma-open | glaucoma, open-angle | C0017612 | risk/postop | unspecified open-angle glaucoma               |
| 11 | glaucoma-open | glaucoma, open-angle | C0017612 | risk/postop | normal tension glaucoma                       |
| 11 | glaucoma-open | glaucoma, open-angle | C0017612 | risk/postop | low tension glaucoma                          |
| 11 | glaucoma-open | glaucoma, open-angle | C0017612 | risk/postop | normal pressure glaucoma                      |
| 11 | glaucoma-open | glaucoma, open-angle | C0017612 | risk/postop | glaucoma, normal tension                      |
| 11 | glaucoma-open | glaucoma, open-angle | C0017612 | risk/postop | low-tension glaucoma                          |
| 11 | glaucoma-open | glaucoma, open-angle | C0017612 | risk/postop | primary open-angle glaucoma                   |
| 11 | glaucoma-open | glaucoma, open-angle | C0017612 | risk/postop | primary open angle glaucoma                   |

|    |                      |                        |          |             |                                            |
|----|----------------------|------------------------|----------|-------------|--------------------------------------------|
| 11 | glaucoma-open        | glaucoma, open-angle   | C0017612 | risk/postop | poag                                       |
| 11 | glaucoma-open        | glaucoma, open-angle   | C0017612 | risk/postop | glaucoma, primary open angle               |
| 11 | glaucoma-open        | glaucoma, open-angle   | C0017612 | risk/postop | secondary open-angle glaucoma              |
| 11 | glaucoma-open        | glaucoma, open-angle   | C0017612 | risk/postop | advanced open-angle glaucoma               |
| 11 | glaucoma-open        | glaucoma, open-angle   | C0017612 | risk/postop | lens particle glaucoma                     |
| 12 | glaucoma-closed      | angle closure glaucoma | C0017605 | risk/postop | narrow angle glaucoma                      |
| 12 | glaucoma-closed      | angle closure glaucoma | C0017605 | risk/postop | angle closure glaucoma                     |
| 12 | glaucoma-closed      | angle closure glaucoma | C0017605 | risk/postop | narrow-angle glaucoma                      |
| 12 | glaucoma-closed      | angle closure glaucoma | C0017605 | risk/postop | angle-closure glaucoma                     |
| 12 | glaucoma-closed      | angle closure glaucoma | C0017605 | risk/postop | closed angle glaucoma                      |
| 12 | glaucoma-closed      | angle closure glaucoma | C0017605 | risk/postop | closed-angle glaucoma                      |
| 12 | glaucoma-closed      | angle closure glaucoma | C0017605 | risk/postop | narrow-angle glaucomas                     |
| 12 | glaucoma-closed      | angle closure glaucoma | C0017605 | risk/postop | glaucoma, narrow angle                     |
| 12 | glaucoma-closed      | angle closure glaucoma | C0017605 | risk/postop | glaucoma, narrow-angle                     |
| 12 | glaucoma-closed      | angle closure glaucoma | C0017605 | risk/postop | glaucoma, closed angle                     |
| 12 | glaucoma-closed      | angle closure glaucoma | C0017605 | risk/postop | unspecified primary angle-closure glaucoma |
| 12 | glaucoma-closed      | angle closure glaucoma | C0017605 | risk/postop | primary angle-closure glaucoma             |
| 12 | glaucoma-closed      | angle closure glaucoma | C0017605 | risk/postop | acute angle closure glaucoma               |
| 12 | glaucoma-closed      | angle closure glaucoma | C0017605 | risk/postop | acute angle-closure glaucoma               |
| 12 | glaucoma-closed      | angle closure glaucoma | C0017605 | risk/postop | acute closed-angle glaucoma                |
| 12 | glaucoma-closed      | angle closure glaucoma | C0017605 | risk/postop | chronic angle-closure glaucoma             |
| 12 | glaucoma-closed      | angle closure glaucoma | C0017605 | risk/postop | anatomical narrow angle glaucoma           |
| 12 | glaucoma-closed      | angle closure glaucoma | C0017605 | risk/postop | secondary angle-closure glaucoma           |
| 12 | glaucoma-closed      | angle closure glaucoma | C0017605 | risk/postop | phacomorphic glaucoma                      |
| 12 | glaucoma-closed      | angle closure glaucoma | C0017605 | risk/postop | chronic angle closure glaucoma             |
| 13 | macular degeneration | macular degeneration   | C0024437 | risk        | macular degeneration                       |
| 13 | macular degeneration | macular degeneration   | C0024437 | risk        | degeneration macular                       |
| 13 | macular degeneration | macular degeneration   | C0024437 | risk        | retinal drusen                             |
| 13 | macular degeneration | macular degeneration   | C0024437 | risk        | drusen, retinal                            |
| 13 | macular degeneration | macular degeneration   | C0024437 | risk        | drusen (degenerative)                      |
| 13 | macular degeneration | macular degeneration   | C0024437 | risk        | drusen (degenerative) of retina            |
| 13 | macular degeneration | macular degeneration   | C0024437 | risk        | cystoid macular degeneration of retina     |
| 13 | macular degeneration | macular degeneration   | C0024437 | risk        | macular degeneration                       |
| 13 | macular degeneration | macular degeneration   | C0024437 | risk        | age-related macular degeneration           |
| 13 | macular degeneration | macular degeneration   | C0024437 | risk        | age related macular degeneration           |

|    |                      |                      |          |      |                                                      |
|----|----------------------|----------------------|----------|------|------------------------------------------------------|
| 13 | macular degeneration | macular degeneration | C0024437 | risk | senile macular degeneration                          |
| 13 | macular degeneration | macular degeneration | C0024437 | risk | arnd                                                 |
| 13 | macular degeneration | macular degeneration | C0024437 | risk | degeneration, macular                                |
| 13 | macular degeneration | macular degeneration | C0024437 | risk | macular degenerations                                |
| 13 | macular degeneration | macular degeneration | C0024437 | risk | age related maculopathy                              |
| 13 | macular degeneration | macular degeneration | C0024437 | risk | age-related maculopathy                              |
| 13 | macular degeneration | macular degeneration | C0024437 | risk | macular degeneration, senile                         |
| 13 | macular degeneration | macular degeneration | C0024437 | risk | macular degeneration (senile) of retina, unspecified |
| 13 | macular degeneration | macular degeneration | C0024437 | risk | exudative age-related macular degeneration           |
| 13 | macular degeneration | macular degeneration | C0024437 | risk | exudative senile macular degeneration of retina      |
| 13 | macular degeneration | macular degeneration | C0024437 | risk | neovascular age-related macular degeneration         |
| 13 | macular degeneration | macular degeneration | C0024437 | risk | disciform macular degeneration                       |
| 13 | macular degeneration | macular degeneration | C0024437 | risk | atrophic age-related macular degeneration            |
| 13 | macular degeneration | macular degeneration | C0024437 | risk | nonexudative senile macular degeneration             |
| 13 | macular degeneration | macular degeneration | C0024437 | risk | nonexudative senile macular degeneration of retina   |
| 13 | macular degeneration | macular degeneration | C0024437 | risk | nonexudative age-related macular degeneration        |
| 13 | macular degeneration | macular degeneration | C0024437 | risk | dry senile macular degeneration                      |
| 13 | macular degeneration | macular degeneration | C0024437 | risk | geographic atrophy of the macula                     |
| 13 | macular degeneration | macular degeneration | C0024437 | risk | macular drusen                                       |
| 13 | macular degeneration | macular degeneration | C0024437 | risk | cuticular drusen                                     |
| 13 | macular degeneration | macular degeneration | C0024437 | risk | basal laminar drusen                                 |
| 13 | macular degeneration | macular degeneration | C0024437 | risk | drusen, cuticular                                    |
| 13 | macular degeneration | macular degeneration | C0024437 | risk | hard drusen                                          |
| 13 | macular degeneration | macular degeneration | C0024437 | risk | confluent drusen                                     |
| 13 | macular degeneration | macular degeneration | C0024437 | risk | soft drusen                                          |
| 13 | macular              | macular degeneration | C0024437 | risk | soft macular drusen                                  |

|    |                      |                                  |          |      |                                                      |
|----|----------------------|----------------------------------|----------|------|------------------------------------------------------|
|    | degeneration         |                                  |          |      |                                                      |
| 13 | macular degeneration | macular degeneration             | C0024437 | risk | dry macular degeneration                             |
| 13 | macular degeneration | macular degeneration             | C0024437 | risk | geographic atrophy                                   |
| 13 | macular degeneration | macular degeneration             | C0024437 | risk | degeneration, dry macular                            |
| 13 | macular degeneration | macular degeneration             | C0024437 | risk | macular degeneration, dry                            |
| 13 | macular degeneration | macular degeneration             | C0024437 | risk | atrophy, geographic                                  |
| 13 | macular degeneration | macular degeneration             | C0024437 | risk | wet macular degeneration                             |
| 13 | macular degeneration | macular degeneration             | C0024437 | risk | macular degeneration, wet                            |
| 13 | macular degeneration | macular degeneration             | C0024437 | risk | degeneration, wet macular                            |
| 13 | armd                 | age related macular degeneration | C0242383 | risk | macular degeneration                                 |
| 13 | armd                 | age related macular degeneration | C0242383 | risk | age-related macular degeneration                     |
| 13 | armd                 | age related macular degeneration | C0242383 | risk | age related macular degeneration                     |
| 13 | armd                 | age related macular degeneration | C0242383 | risk | senile macular degeneration                          |
| 13 | armd                 | age related macular degeneration | C0242383 | risk | armd                                                 |
| 13 | armd                 | age related macular degeneration | C0242383 | risk | degeneration, macular                                |
| 13 | armd                 | age related macular degeneration | C0242383 | risk | macular degenerations                                |
| 13 | armd                 | age related macular degeneration | C0242383 | risk | age related maculopathy                              |
| 13 | armd                 | age related macular degeneration | C0242383 | risk | age-related maculopathy                              |
| 13 | armd                 | age related macular degeneration | C0242383 | risk | macular degeneration, senile                         |
| 13 | armd                 | age related macular degeneration | C0242383 | risk | macular degeneration (senile) of retina, unspecified |
| 13 | armd                 | age related macular degeneration | C0242383 | risk | dry macular degeneration                             |
| 13 | armd                 | age related macular degeneration | C0242383 | risk | geographic atrophy                                   |
| 13 | armd                 | age related macular degeneration | C0242383 | risk | degeneration, dry macular                            |
| 13 | armd                 | age related macular degeneration | C0242383 | risk | macular degeneration, dry                            |
| 13 | armd                 | age related macular degeneration | C0242383 | risk | atrophy, geographic                                  |
| 13 | armd                 | age related macular degeneration | C0242383 | risk | wet macular degeneration                             |

|    |                   |                                  |          |      |                                                    |
|----|-------------------|----------------------------------|----------|------|----------------------------------------------------|
| 13 | armd              | age related macular degeneration | C0242383 | risk | macular degeneration, wet                          |
| 13 | armd              | age related macular degeneration | C0242383 | risk | degeneration, wet macular                          |
| 13 | armd              | age related macular degeneration | C0242383 | risk | atrophic age-related macular degeneration          |
| 13 | armd              | age related macular degeneration | C0242383 | risk | nonexudative senile macular degeneration           |
| 13 | armd              | age related macular degeneration | C0242383 | risk | nonexudative senile macular degeneration of retina |
| 13 | armd              | age related macular degeneration | C0242383 | risk | nonexudative age-related macular degeneration      |
| 13 | armd              | age related macular degeneration | C0242383 | risk | dry senile macular degeneration                    |
| 13 | armd              | age related macular degeneration | C0242383 | risk | geographic atrophy of the macula                   |
| 14 | diabetes mellitus | diabetes mellitus                | C0011849 | risk | diabetes                                           |
| 14 | diabetes mellitus | diabetes mellitus                | C0011849 | risk | diabetes mellitus                                  |
| 14 | diabetes mellitus | diabetes mellitus                | C0011849 | risk | diabetes nos                                       |
| 14 | diabetes mellitus | diabetes mellitus                | C0011849 | risk | type 1 diabetes                                    |
| 14 | diabetes mellitus | diabetes mellitus                | C0011849 | risk | iddm                                               |
| 14 | diabetes mellitus | diabetes mellitus                | C0011849 | risk | insulin dependent diabetes                         |
| 14 | diabetes mellitus | diabetes mellitus                | C0011849 | risk | type i diabetes                                    |
| 14 | diabetes mellitus | diabetes mellitus                | C0011849 | risk | insulin-dependent diabetes mellitus                |
| 14 | diabetes mellitus | diabetes mellitus                | C0011849 | risk | type 1 diabetes mellitus                           |
| 14 | diabetes mellitus | diabetes mellitus                | C0011849 | risk | insulin-dependent diabetes                         |
| 14 | diabetes mellitus | diabetes mellitus                | C0011849 | risk | insulin dependent diabetes mellitus                |
| 14 | diabetes mellitus | diabetes mellitus                | C0011849 | risk | diabetes mellitus type 1                           |
| 14 | diabetes mellitus | diabetes mellitus                | C0011849 | risk | type i diabetes mellitus                           |
| 14 | diabetes mellitus | diabetes mellitus                | C0011849 | risk | juvenile diabetes                                  |
| 14 | diabetes mellitus | diabetes mellitus                | C0011849 | risk | diabetes type 1                                    |
| 14 | diabetes mellitus | diabetes mellitus                | C0011849 | risk | diabetes mellitus type i                           |
| 14 | diabetes mellitus | diabetes mellitus                | C0011849 | risk | diabetes mellitus, insulin dependent               |
| 14 | diabetes mellitus | diabetes mellitus                | C0011849 | risk | insulin dependent diabetic                         |
| 14 | diabetes mellitus | diabetes mellitus                | C0011849 | risk | diabetes mellitus, type 1                          |
| 14 | diabetes mellitus | diabetes mellitus                | C0011849 | risk | juvenile-onset diabetes                            |
| 14 | diabetes mellitus | diabetes mellitus                | C0011849 | risk | brittle diabetes mellitus                          |
| 14 | diabetes mellitus | diabetes mellitus                | C0011849 | risk | diabetes mellitus, type i                          |
| 14 | diabetes mellitus | diabetes mellitus                | C0011849 | risk | diabetes mellitus, insulin-dependent               |
| 14 | diabetes mellitus | diabetes mellitus                | C0011849 | risk | juvenile onset diabetes mellitus                   |
| 14 | diabetes mellitus | diabetes mellitus                | C0011849 | risk | juvenile-onset diabetes mellitus                   |
| 14 | diabetes mellitus | diabetes mellitus                | C0011849 | risk | diabetes mellitus insulin-dependent                |
| 14 | diabetes mellitus | diabetes mellitus                | C0011849 | risk | diabetes mellitus, juvenile onset                  |

|    |                   |                   |          |      |                                                 |
|----|-------------------|-------------------|----------|------|-------------------------------------------------|
| 14 | diabetes mellitus | diabetes mellitus | C0011849 | risk | diabetes mellitus, brittle                      |
| 14 | diabetes mellitus | diabetes mellitus | C0011849 | risk | diabetes mellitus, ketosis prone                |
| 14 | diabetes mellitus | diabetes mellitus | C0011849 | risk | insulin-dependent diabetes mellitus 1           |
| 14 | diabetes mellitus | diabetes mellitus | C0011849 | risk | type 2 diabetes                                 |
| 14 | diabetes mellitus | diabetes mellitus | C0011849 | risk | type ii diabetes                                |
| 14 | diabetes mellitus | diabetes mellitus | C0011849 | risk | diabetes mellitus type 2                        |
| 14 | diabetes mellitus | diabetes mellitus | C0011849 | risk | type 2 diabetes mellitus                        |
| 14 | diabetes mellitus | diabetes mellitus | C0011849 | risk | diabetes mellitus type ii                       |
| 14 | diabetes mellitus | diabetes mellitus | C0011849 | risk | adult-onset diabetes                            |
| 14 | diabetes mellitus | diabetes mellitus | C0011849 | risk | diabetes mellitus, type 2                       |
| 14 | diabetes mellitus | diabetes mellitus | C0011849 | risk | non-insulin dependent diabetes                  |
| 14 | diabetes mellitus | diabetes mellitus | C0011849 | risk | niddm                                           |
| 14 | diabetes mellitus | diabetes mellitus | C0011849 | risk | type ii diabetes mellitus                       |
| 14 | diabetes mellitus | diabetes mellitus | C0011849 | risk | non-insulin-dependent diabetes mellitus         |
| 14 | diabetes mellitus | diabetes mellitus | C0011849 | risk | non-insulin dependent diabetes mellitus         |
| 14 | diabetes mellitus | diabetes mellitus | C0011849 | risk | adult-onset diabetes mellitus                   |
| 14 | diabetes mellitus | diabetes mellitus | C0011849 | risk | diabetes, type 2                                |
| 14 | diabetes mellitus | diabetes mellitus | C0011849 | risk | noninsulin-dependent diabetes mellitus          |
| 14 | diabetes mellitus | diabetes mellitus | C0011849 | risk | diabetes mellitus, type ii                      |
| 14 | diabetes mellitus | diabetes mellitus | C0011849 | risk | maturity onset diabetes                         |
| 14 | diabetes mellitus | diabetes mellitus | C0011849 | risk | maturity-onset diabetes                         |
| 14 | diabetes mellitus | diabetes mellitus | C0011849 | risk | diabetes mellitus, adult onset                  |
| 14 | diabetes mellitus | diabetes mellitus | C0011849 | risk | diabetes mellitus, non-insulin-dependent        |
| 14 | diabetes mellitus | diabetes mellitus | C0011849 | risk | diabetes mellitus, stable                       |
| 14 | diabetes mellitus | diabetes mellitus | C0011849 | risk | diabetes mellitus, noninsulin dependent         |
| 14 | diabetes mellitus | diabetes mellitus | C0011849 | risk | maturity onset diabetes mellitus                |
| 14 | diabetes mellitus | diabetes mellitus | C0011849 | risk | diabetes mellitus, non insulin dependent        |
| 14 | diabetes mellitus | diabetes mellitus | C0011849 | risk | diabetes mellitus, adult-onset                  |
| 14 | diabetes mellitus | diabetes mellitus | C0011849 | risk | diabetes mellitus, noninsulin-dependent         |
| 14 | diabetes mellitus | diabetes mellitus | C0011849 | risk | maturity-onset diabetes mellitus                |
| 14 | diabetes mellitus | diabetes mellitus | C0011849 | risk | diabetes mellitus non insulin-dep               |
| 14 | diabetes mellitus | diabetes mellitus | C0011849 | risk | niddm - non-insulin dependent diabetes mellitus |
| 14 | diabetes mellitus | diabetes mellitus | C0011849 | risk | diabetes mellitus non-insulin-dependent         |
| 14 | diabetes mellitus | diabetes mellitus | C0011849 | risk | diabetes mellitus, maturity onset               |
| 14 | diabetes mellitus | diabetes mellitus | C0011849 | risk | diabetic peripheral vascular disease            |

|    |                   |                   |          |      |                                                        |
|----|-------------------|-------------------|----------|------|--------------------------------------------------------|
| 14 | diabetes mellitus | diabetes mellitus | C0011849 | risk | diabetes mellitus with peripheral circulatory disorder |
| 14 | diabetes mellitus | diabetes mellitus | C0011849 | risk | diabetic ketoacidosis                                  |
| 14 | diabetes mellitus | diabetes mellitus | C0011849 | risk | diabetic ketoacidoses                                  |
| 14 | diabetes mellitus | diabetes mellitus | C0011849 | risk | diabetic acidosis                                      |
| 14 | diabetes mellitus | diabetes mellitus | C0011849 | risk | diabetes mellitus with ketoacidosis                    |
| 14 | diabetes mellitus | diabetes mellitus | C0011849 | risk | diabetic ketosis                                       |
| 14 | diabetes mellitus | diabetes mellitus | C0011849 | risk | ketoacidosis, diabetic                                 |
| 14 | diabetes mellitus | diabetes mellitus | C0011849 | risk | acidosis, diabetic                                     |
| 14 | diabetes mellitus | diabetes mellitus | C0011849 | risk | gestational diabetes                                   |
| 14 | diabetes mellitus | diabetes mellitus | C0011849 | risk | gestational diabetes mellitus                          |
| 14 | diabetes mellitus | diabetes mellitus | C0011849 | risk | diabetes in pregnancy                                  |
| 14 | diabetes mellitus | diabetes mellitus | C0011849 | risk | diabetes, gestational                                  |
| 14 | diabetes mellitus | diabetes mellitus | C0011849 | risk | maternal gestational diabetes mellitus                 |
| 14 | diabetes mellitus | diabetes mellitus | C0011849 | risk | pregnancy-induced diabetes                             |
| 14 | diabetes mellitus | diabetes mellitus | C0011849 | risk | diabetes, pregnancy-induced                            |
| 14 | diabetes mellitus | diabetes mellitus | C0011849 | risk | diabetes, pregnancy induced                            |
| 14 | diabetes mellitus | diabetes mellitus | C0011849 | risk | diabetes mellitus, gestational                         |
| 14 | diabetes mellitus | diabetes mellitus | C0011849 | risk | diabetes mellitus gestational                          |
| 14 | diabetes mellitus | diabetes mellitus | C0011849 | risk | neonatal diabetes mellitus                             |
| 14 | diabetes mellitus | diabetes mellitus | C0011849 | risk | neonatal diabetes                                      |
| 14 | diabetes mellitus | diabetes mellitus | C0011849 | risk | prediabetes                                            |
| 14 | diabetes mellitus | diabetes mellitus | C0011849 | risk | pre-diabetes                                           |
| 14 | diabetes mellitus | diabetes mellitus | C0011849 | risk | prediabetic state                                      |
| 14 | diabetes mellitus | diabetes mellitus | C0011849 | risk | vascular disease, diabetic                             |
| 14 | diabetes mellitus | diabetes mellitus | C0011849 | risk | diabetic angiopathy                                    |
| 14 | diabetes mellitus | diabetes mellitus | C0011849 | risk | diabetic vascular disease                              |
| 14 | diabetes mellitus | diabetes mellitus | C0011849 | risk | diabetic vascular complications                        |
| 14 | diabetes mellitus | diabetes mellitus | C0011849 | risk | diabetic nephropathy                                   |
| 14 | diabetes mellitus | diabetes mellitus | C0011849 | risk | diabetic kidney disease                                |
| 14 | diabetes mellitus | diabetes mellitus | C0011849 | risk | diabetic renal disease                                 |
| 14 | diabetes mellitus | diabetes mellitus | C0011849 | risk | nephropathy, diabetic                                  |
| 14 | diabetes mellitus | diabetes mellitus | C0011849 | risk | kidney disease, diabetic                               |
| 14 | diabetes mellitus | diabetes mellitus | C0011849 | risk | diabetes with renal manifestations                     |
| 14 | diabetes mellitus | diabetes mellitus | C0011849 | risk | diabetic neuropathy                                    |
| 14 | diabetes mellitus | diabetes mellitus | C0011849 | risk | diabetes mellitus with neuropathy                      |
| 14 | diabetes mellitus | diabetes mellitus | C0011849 | risk | neuropathy, diabetic                                   |
| 14 | diabetes mellitus | diabetes mellitus | C0011849 | risk | diabetic neuropathies                                  |
| 14 | diabetes mellitus | diabetes mellitus | C0011849 | risk | diabetes mellitus with neurological manifestation      |
| 14 | diabetes mellitus | diabetes mellitus | C0011849 | risk | diabetic retinopathy                                   |



|    |                   |                   |          |      |                                                   |
|----|-------------------|-------------------|----------|------|---------------------------------------------------|
| 14 | diabetes mellitus | diabetes mellitus | C0011849 | risk | retinopathy, diabetic                             |
| 14 | diabetes mellitus | diabetes mellitus | C0011849 | risk | diabetic retinopathies                            |
| 14 | diabetes mellitus | diabetes mellitus | C0011849 | risk | diabetic retinopathy nos                          |
| 14 | diabetes mellitus | diabetes mellitus | C0011849 | risk | hyperosmolar coma                                 |
| 14 | diabetes mellitus | diabetes mellitus | C0011849 | risk | hhnk                                              |
| 14 | diabetes mellitus | diabetes mellitus | C0011849 | risk | diabetic hyperosmolar coma                        |
| 14 | diabetes mellitus | diabetes mellitus | C0011849 | risk | hyperglycemic hyperosmolar nonketotic coma        |
| 14 | diabetes mellitus | diabetes mellitus | C0011849 | risk | hyperosmolar hyperglycemic nonketotic coma        |
| 14 | diabetes mellitus | diabetes mellitus | C0011849 | risk | nonketotic hyperglycemic-hyperosmolar coma        |
| 14 | diabetes mellitus | diabetes mellitus | C0011849 | risk | hyperosmolar nonketotic coma in diabetes          |
| 14 | diabetes mellitus | diabetes mellitus | C0011849 | risk | diabetes mellitus with hyperosmolar coma          |
| 14 | diabetes mellitus | diabetes mellitus | C0011849 | risk | diabetic foot                                     |
| 14 | diabetes mellitus | diabetes mellitus | C0011849 | risk | diabetic feet                                     |
| 14 | diabetes mellitus | diabetes mellitus | C0011849 | risk | foot, diabetic                                    |
| 14 | diabetes mellitus | diabetes mellitus | C0011849 | risk | feet, diabetic                                    |
| 14 | diabetes mellitus | diabetes mellitus | C0011849 | risk | diabetic complications                            |
| 14 | diabetes mellitus | diabetes mellitus | C0011849 | risk | diabetes complications                            |
| 14 | diabetes mellitus | diabetes mellitus | C0011849 | risk | complications of diabetes mellitus                |
| 14 | diabetes mellitus | diabetes mellitus | C0011849 | risk | diabetes-related complications                    |
| 14 | diabetes mellitus | diabetes mellitus | C0011849 | risk | diabetes related complications                    |
| 14 | diabetes mellitus | diabetes mellitus | C0011849 | risk | diabetic complication                             |
| 14 | diabetes mellitus | diabetes mellitus | C0011849 | risk | diabetes complication                             |
| 14 | diabetes mellitus | diabetes mellitus | C0011849 | risk | diabetes mellitus complications                   |
| 14 | diabetes mellitus | diabetes mellitus | C0011849 | risk | diabetes-related complication                     |
| 14 | diabetes mellitus | diabetes mellitus | C0011849 | risk | diabetes mellitus complication                    |
| 14 | diabetes mellitus | diabetes mellitus | C0011849 | risk | diabetes with diabetic complications              |
| 14 | diabetes mellitus | diabetes mellitus | C0011849 | risk | diabetes mellitus with complication               |
| 14 | diabetes mellitus | diabetes mellitus | C0011849 | risk | diabetic coma                                     |
| 14 | diabetes mellitus | diabetes mellitus | C0011849 | risk | diabetic comas                                    |
| 14 | diabetes mellitus | diabetes mellitus | C0011849 | risk | diabetes mellitus without complication            |
| 14 | diabetes mellitus | diabetes mellitus | C0011849 | risk | diabetes mellitus without mention of complication |
| 14 | diabetes mellitus | diabetes mellitus | C0011849 | risk | insulin dependent diabetes mellitus type ia       |
| 14 | diabetes mellitus | diabetes mellitus | C0011849 | risk | diabetes mellitus type 2 in obese                 |
| 14 | diabetes mellitus | diabetes mellitus | C0011849 | risk | niddm in obese                                    |
| 14 | diabetes mellitus | diabetes mellitus | C0011849 | risk | secondary diabetes mellitus                       |
| 14 | diabetes mellitus | diabetes mellitus | C0011849 | risk | drug-induced diabetes mellitus                    |

|    |                   |                   |          |      |                                                      |
|----|-------------------|-------------------|----------|------|------------------------------------------------------|
| 14 | diabetes mellitus | diabetes mellitus | C0011849 | risk | gestational diabetes mellitus, class a2              |
| 14 | diabetes mellitus | diabetes mellitus | C0011849 | risk | diabetes mellitus due to abnormal insulin            |
| 14 | diabetes mellitus | diabetes mellitus | C0011849 | risk | diabetes mellitus, postpartum                        |
| 14 | diabetes mellitus | diabetes mellitus | C0011849 | risk | steroid-induced diabetes                             |
| 14 | diabetes mellitus | diabetes mellitus | C0011849 | risk | diabetes steroid-induced                             |
| 14 | diabetes mellitus | diabetes mellitus | C0011849 | risk | diabetes mellitus associated with pancreatic disease |
| 14 | diabetes mellitus | diabetes mellitus | C0011849 | risk | mody                                                 |
| 14 | diabetes mellitus | diabetes mellitus | C0011849 | risk | maturity-onset diabetes of the young                 |
| 14 | diabetes mellitus | diabetes mellitus | C0011849 | risk | maturity onset diabetes in youth                     |
| 14 | diabetes mellitus | diabetes mellitus | C0011849 | risk | type 2 diabetes mellitus without complications       |
| 14 | diabetes mellitus | diabetes mellitus | C0011849 | risk | diabetes mellitus type 2 in nonobese                 |
| 14 | diabetes mellitus | diabetes mellitus | C0011849 | risk | maternal diabetes mellitus                           |
| 14 | diabetes mellitus | diabetes mellitus | C0011849 | risk | diabetes mellitus associated with cystic fibrosis    |
| 14 | diabetes mellitus | diabetes mellitus | C0011849 | risk | posttransplant diabetes mellitus                     |
| 14 | diabetes mellitus | diabetes mellitus | C0011849 | risk | diabetic coma with ketoacidosis                      |
| 14 | diabetes mellitus | diabetes mellitus | C0011849 | risk | diabetic glomerulopathy                              |
| 14 | diabetes mellitus | diabetes mellitus | C0011849 | risk | diabetic glomerulosclerosis                          |
| 14 | diabetes mellitus | diabetes mellitus | C0011849 | risk | nodular glomerulosclerosis                           |
| 14 | diabetes mellitus | diabetes mellitus | C0011849 | risk | kimmelstiel-wilson disease                           |
| 14 | diabetes mellitus | diabetes mellitus | C0011849 | risk | diabetic radiculopathy                               |
| 14 | diabetes mellitus | diabetes mellitus | C0011849 | risk | diabetic mononeuropathy multiplex                    |
| 14 | diabetes mellitus | diabetes mellitus | C0011849 | risk | anemia of diabetes                                   |
| 14 | diabetes mellitus | diabetes mellitus | C0011849 | risk | diabetic maculopathy                                 |
| 14 | diabetes mellitus | diabetes mellitus | C0011849 | risk | proliferative diabetic retinopathy                   |
| 14 | diabetes mellitus | diabetes mellitus | C0011849 | risk | preproliferative retinopathy                         |
| 14 | diabetes mellitus | diabetes mellitus | C0011849 | risk | diabetic traction retinal detachment                 |
| 14 | diabetes mellitus | diabetes mellitus | C0011849 | risk | chronic painful diabetic neuropathy                  |
| 14 | diabetes mellitus | diabetes mellitus | C0011849 | risk | incipient diabetic nephropathy                       |
| 14 | diabetes mellitus | diabetes mellitus | C0011849 | risk | cellulitis in diabetic foot                          |
| 14 | diabetes mellitus | diabetes mellitus | C0011849 | risk | diabetic mononeuritis multiplex                      |
| 14 | diabetes mellitus | diabetes mellitus | C0011849 | risk | armanni-ebstein change                               |
| 14 | diabetes mellitus | diabetes mellitus | C0011849 | risk | mild non-proliferative diabetic retinopathy          |
| 14 | diabetes mellitus | diabetes mellitus | C0011849 | risk | mild nonproliferative retinopathy                    |
| 14 | diabetes mellitus | diabetes mellitus | C0011849 | risk | mild non proliferative retinopathy                   |
| 14 | diabetes mellitus | diabetes mellitus | C0011849 | risk | moderate nonproliferative diabetic retinopathy       |

|    |                   |                   |          |      |                                                               |
|----|-------------------|-------------------|----------|------|---------------------------------------------------------------|
| 14 | diabetes mellitus | diabetes mellitus | C0011849 | risk | early proliferative diabetic retinopathy                      |
| 14 | diabetes mellitus | diabetes mellitus | C0011849 | risk | high risk proliferative diabetic retinopathy                  |
| 14 | diabetes mellitus | diabetes mellitus | C0011849 | risk | inactive proliferative diabetic retinopathy                   |
| 14 | diabetes mellitus | diabetes mellitus | C0011849 | risk | proliferative diabetic retinopathy - quiescent                |
| 14 | diabetes mellitus | diabetes mellitus | C0011849 | risk | diabetic vitreous hemorrhage                                  |
| 14 | diabetes mellitus | diabetes mellitus | C0011849 | risk | diabetic peripheral neuropathy                                |
| 14 | diabetes mellitus | diabetes mellitus | C0011849 | risk | diabetic sensory polyneuropathy                               |
| 14 | diabetes mellitus | diabetes mellitus | C0011849 | risk | diabetes mellitus with neurological manifestation             |
| 14 | diabetes mellitus | diabetes mellitus | C0011849 | risk | very severe proliferative diabetic retinopathy                |
| 14 | diabetes mellitus | diabetes mellitus | C0011849 | risk | intraretinal microvascular abnormality                        |
| 14 | diabetes mellitus | diabetes mellitus | C0011849 | risk | diabetic foot ulcer                                           |
| 14 | diabetes mellitus | diabetes mellitus | C0011849 | risk | diabetic foot ulcers                                          |
| 14 | diabetes mellitus | diabetes mellitus | C0011849 | risk | erectile dysfunction associated with type 2 diabetes mellitus |
| 14 | diabetes mellitus | diabetes mellitus | C0011849 | risk | overt diabetic nephropathy                                    |
| 14 | diabetes mellitus | diabetes mellitus | C0011849 | risk | diabetic polyneuropathy                                       |
| 14 | diabetes mellitus | diabetes mellitus | C0011849 | risk | neuropathy in diabetes                                        |
| 14 | diabetes mellitus | diabetes mellitus | C0011849 | risk | polyneuropathy in diabetes                                    |
| 14 | diabetes mellitus | diabetes mellitus | C0011849 | risk | polyneuropathy, diabetic                                      |
| 14 | diabetes mellitus | diabetes mellitus | C0011849 | risk | diabetes mellitus with polyneuropathy                         |
| 14 | diabetes mellitus | diabetes mellitus | C0011849 | risk | diabetic autonomic neuropathy                                 |
| 14 | diabetes mellitus | diabetes mellitus | C0011849 | risk | autonomic neuropathy due to diabetes                          |
| 14 | diabetes mellitus | diabetes mellitus | C0011849 | risk | autonomic neuropathy, diabetic                                |
| 14 | diabetes mellitus | diabetes mellitus | C0011849 | risk | nonproliferative diabetic retinopathy                         |
| 14 | diabetes mellitus | diabetes mellitus | C0011849 | risk | background diabetic retinopathy                               |
| 14 | diabetes mellitus | diabetes mellitus | C0011849 | risk | non-proliferative diabetic retinopathy                        |
| 14 | diabetes mellitus | diabetes mellitus | C0011849 | risk | non proliferative diabetic retinopathy                        |
| 14 | diabetes mellitus | diabetes mellitus | C0011849 | risk | nonproliferative diabetic retinopathy nos                     |
| 14 | diabetes mellitus | diabetes mellitus | C0011849 | risk | diabetic retinopathy nos                                      |
| 14 | diabetes mellitus | diabetes mellitus | C0011849 | risk | proliferative diabetic retinopathy                            |
| 14 | diabetes mellitus | diabetes mellitus | C0011849 | risk | severe nonproliferative diabetic retinopathy                  |
| 14 | diabetes mellitus | diabetes mellitus | C0011849 | risk | diabetic macular edema                                        |
| 14 | diabetes mellitus | diabetes mellitus | C0011849 | risk | diabetic cataract                                             |

|    |                   |                   |          |      |                                         |
|----|-------------------|-------------------|----------|------|-----------------------------------------|
| 14 | diabetes mellitus | diabetes mellitus | C0011849 | risk | papillary necrosis                      |
| 14 | diabetes mellitus | diabetes mellitus | C0011849 | risk | medullary necrosis                      |
| 14 | diabetes mellitus | diabetes mellitus | C0011849 | risk | renal papillary necrosis                |
| 14 | diabetes mellitus | diabetes mellitus | C0011849 | risk | diabetic microangiopathy                |
| 14 | diabetes mellitus | diabetes mellitus | C0011849 | risk | retinal neovascularization              |
| 14 | diabetes mellitus | diabetes mellitus | C0011849 | risk | neovascularization, retinal             |
| 14 | diabetes mellitus | diabetes mellitus | C0011849 | risk | mauriac syndrome                        |
| 14 | diabetes mellitus | diabetes mellitus | C0011849 | risk | diabetic gastroparesis                  |
| 14 | diabetes mellitus | diabetes mellitus | C0011849 | risk | diabetic mononeuropathy                 |
| 14 | diabetes mellitus | diabetes mellitus | C0011849 | risk | diabetic mononeuropathies               |
| 14 | diabetes mellitus | diabetes mellitus | C0011849 | risk | diabetic amyotrophy                     |
| 14 | diabetes mellitus | diabetes mellitus | C0011849 | risk | amyotrophy, diabetic                    |
| 14 | diabetes mellitus | diabetes mellitus | C0011849 | risk | intercapillary glomerulosclerosis       |
| 14 | diabetes mellitus | diabetes mellitus | C0011849 | risk | proliferative retinopathy               |
| 14 | diabetes mellitus | diabetes mellitus | C0011849 | risk | diabetic eye disease                    |
| 14 | diabetes mellitus | diabetes mellitus | C0011849 | risk | diabetic eye problems                   |
| 14 | diabetes mellitus | diabetes mellitus | C0011849 | risk | diabetes with ophthalmic manifestations |
| 14 | diabetes mellitus | diabetes mellitus | C0011849 | risk | necrobiosis lipoidica diabetorum        |
| 14 | diabetes mellitus | diabetes mellitus | C0011849 | risk | necrobiosis diabetorum                  |
| 14 | diabetes mellitus | diabetes mellitus | C0011849 | risk | diabetic enteropathy                    |
| 14 | diabetes mellitus | diabetes mellitus | C0011849 | risk | diabetic diarrhea                       |
| 14 | diabetes mellitus | diabetes mellitus | C0011849 | risk | emphysematous pyelonephritis            |
| 14 | diabetes mellitus | diabetes mellitus | C0011849 | risk | diabetic dermopathy                     |
| 14 | diabetes mellitus | diabetes mellitus | C0011849 | risk | bullosis diabetorum                     |
| 14 | diabetes mellitus | diabetes mellitus | C0011849 | risk | diabetic bulla                          |
| 14 | diabetes mellitus | diabetes mellitus | C0011849 | risk | diabetic cheiropathy                    |
| 14 | diabetes mellitus | diabetes mellitus | C0011849 | risk | diabetic hand syndrome                  |
| 14 | diabetes mellitus | diabetes mellitus | C0011849 | risk | diabetic cheiroarthropathy              |
| 14 | diabetes mellitus | diabetes mellitus | C0011849 | risk | diabetic gangrene                       |
| 14 | diabetes mellitus | diabetes mellitus | C0011849 | risk | diabetes with gangrene                  |
| 14 | diabetes mellitus | diabetes mellitus | C0011849 | risk | microalbuminuria                        |
| 14 | diabetes mellitus | diabetes mellitus | C0011849 | risk | diabetic ulcer                          |
| 14 | diabetes mellitus | diabetes mellitus | C0011849 | risk | diabetic foot infection                 |
| 14 | diabetes mellitus | diabetes mellitus | C0011849 | risk | diabetic neuropathic ulcer              |
| 14 | diabetes mellitus | diabetes mellitus | C0011849 | risk | diabetic cardiomyopathy                 |
| 14 | diabetes mellitus | diabetes mellitus | C0011849 | risk | diabetic blindness                      |
| 14 | diabetes mellitus | diabetes mellitus | C0011849 | risk | diabetic retinal edema                  |
| 14 | diabetes mellitus | diabetes mellitus | C0011849 | risk | diabetic end stage renal disease        |
| 14 | diabetes mellitus | diabetes mellitus | C0011849 | risk | diabetic glaucoma                       |
| 14 | diabetes mellitus | diabetes mellitus | C0011849 | risk | diabetic gastropathy                    |
| 14 | diabetes mellitus | diabetes mellitus | C0011849 | risk | somogyi effect                          |

|    |                   |                   |          |      |                                                |
|----|-------------------|-------------------|----------|------|------------------------------------------------|
| 14 | diabetes mellitus | diabetes mellitus | C0011849 | risk | somogyi phenomenon                             |
| 14 | diabetes mellitus | diabetes mellitus | C0011849 | risk | diabetic gastroenteropathy                     |
| 14 | diabetes mellitus | diabetes mellitus | C0011849 | risk | diabetic fetopathy                             |
| 14 | diabetes mellitus | diabetes mellitus | C0011849 | risk | diabetic mastopathy                            |
| 14 | diabetes mellitus | diabetes mellitus | C0011849 | risk | diabetic cystopathy                            |
| 14 | diabetes mellitus | diabetes mellitus | C0011849 | risk | hyperglycemic hyperosmolar nonketotic syndrome |
| 14 | diabetes mellitus | diabetes mellitus | C0011849 | risk | diabetic keratopathy                           |
| 14 | diabetes mellitus | diabetes mellitus | C0011849 | risk | diabetic encephalopathy                        |
| 14 | diabetes mellitus | diabetes mellitus | C0011849 | risk | diabetic dyslipidemia                          |
| 14 | diabetes mellitus | diabetes mellitus | C0011849 | risk | acute papillary necrosis                       |
| 14 | diabetes mellitus | diabetes mellitus | C0011849 | risk | calcific papillary necrosis                    |
| 14 | diabetes mellitus | diabetes mellitus | C0011849 | risk | peripheral retinal neovascularization          |
| 14 | diabetes mellitus | diabetes mellitus | C0011849 | risk | extramacular choroidal neovascular membrane    |
| 14 | diabetes mellitus | diabetes mellitus | C0011849 | risk | peripapillary choroidal neovascular membrane   |
| 14 | diabetes mellitus | diabetes mellitus | C0011849 | risk | idiopathic choroidal neovascular membrane      |
| 14 | diabetes mellitus | diabetes mellitus | C0011849 | risk | choroidal neovascular membrane                 |
| 15 | nystagmus         | nystagmus         | C0028738 | risk | nystagmus                                      |
| 15 | nystagmus         | nystagmus         | C0028738 | risk | pathologic nystagmus                           |
| 15 | nystagmus         | nystagmus         | C0028738 | risk | dissociated nystagmus                          |
| 15 | nystagmus         | nystagmus         | C0028738 | risk | roving eye movements                           |
| 15 | nystagmus         | nystagmus         | C0028738 | risk | ocular nystagmus                               |
| 15 | nystagmus         | nystagmus         | C0028738 | risk | searching eye movements                        |
| 15 | nystagmus         | nystagmus         | C0028738 | risk | nystagmus                                      |
| 15 | nystagmus         | nystagmus         | C0028738 | risk | congenital nystagmus                           |
| 15 | nystagmus         | nystagmus         | C0028738 | risk | nystagmus, congenital                          |
| 15 | nystagmus         | nystagmus         | C0028738 | risk | fixation nystagmus                             |
| 15 | nystagmus         | nystagmus         | C0028738 | risk | latent nystagmus                               |
| 15 | nystagmus         | nystagmus         | C0028738 | risk | rotatory nystagmus                             |
| 15 | nystagmus         | nystagmus         | C0028738 | risk | rotary nystagmus                               |
| 15 | nystagmus         | nystagmus         | C0028738 | risk | nystagmus, rotary                              |
| 15 | nystagmus         | nystagmus         | C0028738 | risk | periodic alternating nystagmus                 |
| 15 | nystagmus         | nystagmus         | C0028738 | risk | horizontal nystagmus                           |
| 15 | nystagmus         | nystagmus         | C0028738 | risk | nystagmus, horizontal                          |
| 15 | nystagmus         | nystagmus         | C0028738 | risk | vertical nystagmus                             |
| 15 | nystagmus         | nystagmus         | C0028738 | risk | nystagmus, vertical                            |
| 15 | nystagmus         | nystagmus         | C0028738 | risk | rebound nystagmus                              |
| 15 | nystagmus         | nystagmus         | C0028738 | risk | pendular nystagmus                             |
| 15 | nystagmus         | nystagmus         | C0028738 | risk | nystagmus, pendular                            |

|    |                        |                                   |          |            |                                   |
|----|------------------------|-----------------------------------|----------|------------|-----------------------------------|
| 15 | nystagmus              | nystagmus                         | C0028738 | risk       | jerk nystagmus                    |
| 15 | nystagmus              | nystagmus                         | C0028738 | risk       | acquired jerk nystagmus           |
| 15 | nystagmus              | nystagmus                         | C0028738 | risk       | gaze-evoked nystagmus             |
| 15 | nystagmus              | nystagmus                         | C0028738 | risk       | gaze evoked nystagmus             |
| 15 | nystagmus              | nystagmus                         | C0028738 | risk       | end-position nystagmus            |
| 15 | nystagmus              | nystagmus                         | C0028738 | risk       | voluntary nystagmus               |
| 15 | nystagmus              | nystagmus                         | C0028738 | risk       | monocular nystagmus               |
| 15 | nystagmus              | nystagmus                         | C0028738 | risk       | seesaw nystagmus                  |
| 15 | nystagmus              | nystagmus                         | C0028738 | risk       | see-saw nystagmus                 |
| 15 | nystagmus              | nystagmus                         | C0028738 | risk       | gaze paretic nystagmus            |
| 15 | nystagmus              | nystagmus                         | C0028738 | risk       | pressure-induced nystagmus        |
| 15 | nystagmus              | nystagmus                         | C0028738 | risk       | tullio phenomenon                 |
| 15 | nystagmus              | nystagmus                         | C0028738 | risk       | retraction nystagmus              |
| 15 | nystagmus              | nystagmus                         | C0028738 | risk       | nystagmus retractorius            |
| 15 | nystagmus              | nystagmus                         | C0028738 | risk       | multidirectional nystagmus        |
| 15 | nystagmus              | nystagmus                         | C0028738 | risk       | conjugate nystagmus               |
| 15 | nystagmus              | nystagmus                         | C0028738 | risk       | nystagmus, conjugate              |
| 15 | nystagmus              | nystagmus                         | C0028738 | risk       | rotational nystagmus              |
| 15 | nystagmus              | nystagmus                         | C0028738 | risk       | convergence nystagmus             |
| 15 | nystagmus              | nystagmus                         | C0028738 | risk       | positional nystagmus              |
| 15 | nystagmus              | nystagmus                         | C0028738 | risk       | congenital motor nystagmus        |
| 15 | nystagmus              | nystagmus                         | C0028738 | risk       | peripheral vestibular nystagmus   |
| 15 | nystagmus              | nystagmus                         | C0028738 | risk       | central vestibular nystagmus      |
| 15 | nystagmus              | nystagmus                         | C0028738 | risk       | downbeat nystagmus                |
| 15 | nystagmus              | nystagmus                         | C0028738 | risk       | upbeat nystagmus                  |
| 15 | nystagmus              | nystagmus                         | C0028738 | risk       | abducting nystagmus               |
| 15 | nystagmus              | nystagmus                         | C0028738 | risk       | acquired nystagmus                |
| 15 | nystagmus              | nystagmus                         | C0028738 | risk       | acquired pendular nystagmus       |
| 15 | nystagmus              | nystagmus                         | C0028738 | risk       | spasmus nutans                    |
| 15 | nystagmus              | nystagmus                         | C0028738 | risk       | convergence retraction nystagmus  |
| 16 | vitrectomy             | vitrectomy                        | C0042903 | intra/risk | vitrectomy                        |
| 16 | vitrectomy             | vitrectomy                        | C0042903 | intra/risk | vitrectomies                      |
| 16 | vitrectomy             | vitrectomy                        | C0042903 | intra/risk | anterior vitrectomy               |
| 16 | vitrectomy             | vitrectomy                        | C0042903 | intra/risk | mechanical vitrectomy             |
| 16 | vitrectomy             | vitrectomy                        | C0042903 | intra/risk | scleral buckling with vitrectomy  |
| 16 | vitrectomy             | vitrectomy                        | C0042903 | intra/risk | pars plana vitrectomy             |
| 17 | intravitreal injection | intravitreal antibiotic injection | C1444686 | risk       | intravitreal antibiotic injection |
| 17 | inject vitr            | injection of drug into vitreous   | C0395548 | risk       | intravitreal antibiotic injection |
| 17 | ranibizumab            | ranibizumab                       | C1566537 | risk       | ranibizumab                       |
| 17 | ranibizumab            | ranibizumab                       | C1566537 | risk       | lucentis                          |

|    |                        |                                                                      |          |        |                                              |
|----|------------------------|----------------------------------------------------------------------|----------|--------|----------------------------------------------|
| 17 | intravitreal injection | intravitreal injection of a pharmacologic agent (separate procedure) | C0373030 | "risk" | intravitreal njx pharmacologic agt spx       |
| 17 | intravitreal injection | intravitreal injection of a pharmacologic agent (separate procedure) | C0373030 | "risk" | injection eye drug                           |
| 17 | inject vitr            | intravitreal injections                                              | C1554888 | "risk" | intravitreal injection                       |
| 17 | inject vitr            | intravitreal injections                                              | C1554888 | "risk" | intravitreal injections                      |
| 18 | refractive surg        | surgical ocular refractive procedure                                 | C1274010 | risk   | epikeratoplasty                              |
| 18 | refractive surg        | surgical ocular refractive procedure                                 | C1274010 | risk   | epikeratophakia                              |
| 18 | refractive surg        | surgical ocular refractive procedure                                 | C1274010 | risk   | radial keratotomy                            |
| 18 | refractive surg        | surgical ocular refractive procedure                                 | C1274010 | risk   | radial keratotomies                          |
| 18 | refractive surg        | surgical ocular refractive procedure                                 | C1274010 | risk   | keratorefractive surgery                     |
| 18 | refractive surg        | surgical ocular refractive procedure                                 | C1274010 | risk   | prk                                          |
| 18 | refractive surg        | surgical ocular refractive procedure                                 | C1274010 | risk   | photorefractive keratectomy                  |
| 18 | refractive surg        | surgical ocular refractive procedure                                 | C1274010 | risk   | photorefractive keratoplasty                 |
| 18 | refractive surg        | surgical ocular refractive procedure                                 | C1274010 | risk   | photorefractive keratectomy (prk)            |
| 18 | refractive surg        | surgical ocular refractive procedure                                 | C1274010 | risk   | corneal relaxing incision                    |
| 18 | refractive surg        | surgical ocular refractive procedure                                 | C1274010 | risk   | astigmatic keratotomy                        |
| 18 | refractive surg        | surgical ocular refractive procedure                                 | C1274010 | risk   | lasik                                        |
| 18 | refractive surg        | surgical ocular refractive procedure                                 | C1274010 | risk   | laser in situ keratomileusis                 |
| 18 | refractive surg        | surgical ocular refractive procedure                                 | C1274010 | risk   | laser in situ keratomileusis (lasik)         |
| 18 | refractive surg        | surgical ocular refractive procedure                                 | C1274010 | risk   | laser assisted in situ keratomileusis        |
| 18 | refractive surg        | surgical ocular refractive procedure                                 | C1274010 | risk   | limbal relaxing incision                     |
| 18 | refractive surg        | surgical ocular refractive procedure                                 | C1274010 | risk   | conductive keratoplasty                      |
| 18 | refractive surg        | surgical ocular refractive procedure                                 | C1274010 | risk   | lasek                                        |
| 18 | refractive surg        | surgical ocular refractive procedure                                 | C1274010 | risk   | arcuate keratotomy                           |
| 18 | refractive surg        | surgical ocular refractive procedure                                 | C1274010 | risk   | photorefractive keratectomy enhancement      |
| 18 | refractive surg        | surgical ocular refractive procedure                                 | C1274010 | risk   | wavefront-guided photorefractive keratectomy |

|    |                 |                                      |          |           |                                              |
|----|-----------------|--------------------------------------|----------|-----------|----------------------------------------------|
| 18 | refractive surg | surgical ocular refractive procedure | C1274010 | risk      | epi-lasik                                    |
| 18 | refractive surg | surgical ocular refractive procedure | C1274010 | risk      | refractive surgery                           |
| 18 | refractive surg | surgical ocular refractive procedure | C1274010 | risk      | refractive surgical procedure                |
| 18 | refractive surg | surgical ocular refractive procedure | C1274010 | risk      | surgery, refractive                          |
| 18 | refractive surg | surgical ocular refractive procedure | C1274010 | risk      | surgeries, refractive                        |
| 18 | refractive surg | photorefractive keratectomy          | C0395416 | risk      | prk                                          |
| 18 | refractive surg | photorefractive keratectomy          | C0395416 | risk      | photorefractive keratectomy                  |
| 18 | refractive surg | photorefractive keratectomy          | C0395416 | risk      | photorefractive keratoplasty                 |
| 18 | refractive surg | photorefractive keratectomy          | C0395416 | risk      | photorefractive keratectomy (prk)            |
| 18 | refractive surg | photorefractive keratectomy          | C0395416 | risk      | photorefractive keratectomy enhancement      |
| 18 | refractive surg | photorefractive keratectomy          | C0395416 | risk      | wavefront-guided photorefractive keratectomy |
| 18 | refractive surg | photorefractive keratectomy          | C0395416 | risk      | lasik                                        |
| 18 | refractive surg | photorefractive keratectomy          | C0395416 | risk      | laser in situ keratomileusis                 |
| 18 | refractive surg | photorefractive keratectomy          | C0395416 | risk      | laser in situ keratomileusis (lasik)         |
| 18 | refractive surg | photorefractive keratectomy          | C0395416 | risk      | laser assisted in situ keratomileusis        |
| 18 | refractive surg | photorefractive keratectomy          | C0395416 | risk      | lasek                                        |
| 18 | refractive surg | photorefractive keratectomy          | C0395416 | risk      | epi-lasik                                    |
| 18 | refractive surg | surgical ocular refractive procedure | C1274010 | risk/post | correction of astigmatism                    |
| 18 | refractive surg | surgical ocular refractive procedure | C1274010 | risk/post | refractive surgery                           |
| 19 | hyperopia       | hyperopia                            | C0020490 | risk      | anomalous retinal correspondence             |
| 19 | hyperopia       | hyperopia                            | C0020490 | risk      | hyperopia                                    |
| 19 | hyperopia       | hyperopia                            | C0020490 | risk      | farsighted                                   |
| 19 | hyperopia       | hyperopia                            | C0020490 | risk      | farsightedness                               |
| 19 | hyperopia       | hyperopia                            | C0020490 | risk      | hypermetropia                                |
| 19 | hyperopia       | hyperopia                            | C0020490 | risk      | hypermetropia (farsightedness)               |
| 19 | hyperopia       | hyperopia                            | C0020490 | risk      | hypertropia                                  |
| 20 | myopia          | myopia                               | C0027092 | risk      | myopia                                       |
| 20 | myopia          | myopia                               | C0027092 | risk      | nearsightedness                              |
| 20 | myopia          | myopia                               | C0027092 | risk      | nearsighted                                  |
| 20 | myopia          | myopia                               | C0027092 | risk      | near sighted                                 |
| 20 | myopia          | myopia                               | C0027092 | risk      | short-sighted                                |
| 20 | myopia          | myopia                               | C0027092 | risk      | myopias                                      |
| 20 | myopia          | myopia                               | C0027092 | risk      | short sightedness                            |
| 20 | myopia          | myopia                               | C0027092 | risk      | degenerative myopia                          |
| 20 | myopia          | myopia                               | C0027092 | risk      | pathological myopia                          |
| 20 | myopia          | myopia                               | C0027092 | risk      | progressive high myopia                      |



|    |                               |                                                   |          |             |                                        |
|----|-------------------------------|---------------------------------------------------|----------|-------------|----------------------------------------|
| 20 | myopia                        | myopia                                            | C0027092 | risk        | myopia, pathological                   |
| 20 | myopia                        | myopia                                            | C0027092 | risk        | progressive high (degenerative) myopia |
| 20 | myopia                        | myopia                                            | C0027092 | risk        | malignant myopia                       |
| 20 | myopia                        | myopia                                            | C0027092 | risk        | high myopia                            |
| 20 | myopia                        | myopia                                            | C0027092 | risk        | severe myopia                          |
| 20 | myopia                        | myopia                                            | C0027092 | risk        | simple myopia                          |
| 20 | myopia                        | myopia                                            | C0027092 | risk        | myopic macular degeneration            |
| 20 | myopia                        | myopia                                            | C0027092 | risk        | axial myopia                           |
| 21 | anterior vitrectomy           | excision of vitreous opacity by anterior approach | C0197786 | intraop     | anterior vitrectomy                    |
| 22 | extracapsular extraction      | extracapsular extraction of lens                  | C0197726 | na          | aspiration of lens                     |
| 22 | extracapsular extraction      | extracapsular extraction of lens                  | C0197726 | na          | extracapsular cataract extraction      |
| 23 | pars plana lensectomy         | pars plana lensectomy                             | C0395529 | post        | pars plana lensectomy                  |
| 23 | pars plana lensectomy         | pars plana lensectomy                             | C0395529 | post        | pars plana lensectomy                  |
| 24 | iris transillumination defect | iris transillumination defect                     | C1096099 | intraop     | iris transillumination defect          |
| 25 | posterior capsular rupture    | posterior capsule rupture                         | C1535895 | intraop     | posterior capsule rupture              |
| 25 | posterior capsular rupture    | posterior capsular rupture                        | C1626910 | "intraop"   | posterior capsular tear                |
| 25 | posterior capsular rupture    | posterior capsular rupture                        | C1626910 | "intraop"   | posterior capsular rupture             |
| 25 | posterior capsular tear       | posterior capsule tear                            | C1536084 | "intraop"   | posterior capsule tear                 |
| 26 | pco                           | posterior capsule opacification                   | C1444680 | postop      | posterior capsular opacification       |
| 26 | pco                           | posterior capsule opacification                   | C1444680 | postop      | posterior capsule opacification        |
| 26 | pco                           | posterior capsule opacification                   | C1444680 | postop      | posterior capsular fibrosis            |
| 26 | pco                           | posterior capsule opacification                   | C1444680 | postop      | posterior capsule fibrosis             |
| 26 | yag                           | yag laser capsulotomy of lens                     | C0579255 | postop      | yag laser posterior capsulotomy        |
| 26 | yag                           | yag laser posterior capsulotomy                   | C0587069 | postop      | yag laser posterior capsulotomy        |
| 27 | cme                           | macular edema, cystoid                            | C0024440 | risk/postop | macular edema                          |
| 27 | cme                           | macular edema, cystoid                            | C0024440 | risk/postop | cystoid macular edema                  |
| 27 | cme                           | macular edema, cystoid                            | C0024440 | risk/postop | macular edema, cystoid                 |
| 27 | cme                           | macular edema, cystoid                            | C0024440 | risk/postop | edema, cystoid macular                 |
| 27 | cme                           | macular edema, cystoid                            | C0024440 | postop      | irvine-gass syndrome                   |
| 27 | cme                           | macular edema, cystoid                            | C0024440 | postop      | postoperative cystoid macular edema    |

|    |                 |                    |          |        |                                                     |
|----|-----------------|--------------------|----------|--------|-----------------------------------------------------|
| 28 | endophthalmitis | endophthalmitis    | C0014236 | postop | endophthalmitis                                     |
| 28 | endophthalmitis | endophthalmitis    | C0014236 | postop | panophthalmitis                                     |
| 28 | endophthalmitis | endophthalmitis    | C0014236 | postop | vitreous abscess                                    |
| 28 | endophthalmitis | endophthalmitis    | C0014236 | postop | acute endophthalmitis                               |
| 28 | endophthalmitis | endophthalmitis    | C0014236 | postop | chronic endophthalmitis                             |
| 28 | endophthalmitis | endophthalmitis    | C0014236 | postop | purulent endophthalmitis                            |
| 28 | endophthalmitis | endophthalmitis    | C0014236 | postop | unspecified purulent endophthalmitis                |
| 28 | endophthalmitis | endophthalmitis    | C0014236 | postop | postoperative endophthalmitis                       |
| 28 | endophthalmitis | endophthalmitis    | C0014236 | postop | acute postoperative endophthalmitis                 |
| 28 | endophthalmitis | endophthalmitis    | C0014236 | postop | chronic postoperative endophthalmitis               |
| 28 | endophthalmitis | endophthalmitis    | C0014236 | postop | post-traumatic endophthalmitis                      |
| 28 | endophthalmitis | endophthalmitis    | C0014236 | postop | bacterial endophthalmitis                           |
| 28 | endophthalmitis | endophthalmitis    | C0014236 | postop | infectious endophthalmitis                          |
| 29 | retinal detach  | retinal detachment | C0035305 | postop | retinal detachment                                  |
| 29 | retinal detach  | retinal detachment | C0035305 | postop | detached retina                                     |
| 29 | retinal detach  | retinal detachment | C0035305 | postop | retinal detachments                                 |
| 29 | retinal detach  | retinal detachment | C0035305 | postop | detachment, retinal                                 |
| 29 | retinal detach  | retinal detachment | C0035305 | postop | detachments, retinal                                |
| 29 | retinal detach  | retinal detachment | C0035305 | postop | unspecified retinal detachment                      |
| 29 | retinal detach  | retinal detachment | C0035305 | postop | sensory retinal detachment                          |
| 29 | retinal detach  | retinal detachment | C0035305 | postop | retinal breaks                                      |
| 29 | retinal detach  | retinal detachment | C0035305 | postop | breaks, retinal                                     |
| 29 | retinal detach  | retinal detachment | C0035305 | postop | retinal tear                                        |
| 29 | retinal detach  | retinal detachment | C0035305 | postop | retinal break                                       |
| 29 | retinal detach  | retinal detachment | C0035305 | postop | retinal tears                                       |
| 29 | retinal detach  | retinal detachment | C0035305 | postop | retinal hole                                        |
| 29 | retinal detach  | retinal detachment | C0035305 | postop | retinal holes                                       |
| 29 | retinal detach  | retinal detachment | C0035305 | postop | break, retinal                                      |
| 29 | retinal detach  | retinal detachment | C0035305 | postop | retinal dialysis                                    |
| 29 | retinal detach  | retinal detachment | C0035305 | postop | hole, retinal                                       |
| 29 | retinal detach  | retinal detachment | C0035305 | postop | tears, retinal                                      |
| 29 | retinal detach  | retinal detachment | C0035305 | postop | tear, retinal                                       |
| 29 | retinal detach  | retinal detachment | C0035305 | postop | holes, retinal                                      |
| 29 | retinal detach  | retinal detachment | C0035305 | postop | retinal perforation                                 |
| 29 | retinal detach  | retinal detachment | C0035305 | postop | retinal dialyses                                    |
| 29 | retinal detach  | retinal detachment | C0035305 | postop | hole in retina                                      |
| 29 | retinal detach  | retinal detachment | C0035305 | postop | retinal detachment with retinal defect              |
| 29 | retinal detach  | retinal detachment | C0035305 | postop | retinal detachment with retinal defect, unspecified |

|    |                |                      |          |        |                                             |
|----|----------------|----------------------|----------|--------|---------------------------------------------|
| 29 | retinal detach | retinal detachment   | C0035305 | postop | exudative retinal detachment                |
| 29 | retinal detach | retinal detachment   | C0035305 | postop | serous retinal detachment                   |
| 29 | retinal detach | retinal detachment   | C0035305 | postop | horseshoe tear of retina                    |
| 29 | retinal detach | retinal detachment   | C0035305 | postop | horseshoe tear of retina without detachment |
| 29 | retinal detach | retinal detachment   | C0035305 | postop | traction retinal detachment                 |
| 29 | retinal detach | retinal detachment   | C0035305 | postop | rhegmatogenous retinal detachment           |
| 29 | retinal detach | retinal detachment   | C0035305 | postop | retinal detachment with retinal break       |
| 29 | retinal detach | retinal detachment   | C0035305 | postop | retinal detachment with break               |
| 29 | retinal detach | retinal detachment   | C0035305 | postop | giant retinal tear                          |
| 29 | retinal detach | retinal detachment   | C0035305 | postop | macular traction retinal detachment         |
| 29 | retinal detach | retinal detachment   | C0035305 | postop | macular retinoschisis                       |
| 29 | retinal detach | retinal detachment   | C0035305 | postop | diabetic traction retinal detachment        |
| 29 | retinal detach | retinal detachment   | C0035305 | postop | pigment epithelial detachment               |
| 29 | retinal detach | retinal detachment   | C0035305 | postop | retinal pigment epithelial detachment       |
| 29 | retinal detach | retinal detachment   | C0035305 | postop | retinal operculated tear                    |
| 29 | retinal detach | retinal detachment   | C0035305 | postop | pseudophakic retinal detachment             |
| 29 | retinal detach | retinal detachment   | C0035305 | postop | serous macular detachment                   |
| 29 | retinal tear   | retinal perforations | C0035321 | postop | retinal breaks                              |
| 29 | retinal tear   | retinal perforations | C0035321 | postop | breaks, retinal                             |
| 29 | retinal tear   | retinal perforations | C0035321 | postop | retinal tear                                |
| 29 | retinal tear   | retinal perforations | C0035321 | postop | retinal break                               |
| 29 | retinal tear   | retinal perforations | C0035321 | postop | retinal tears                               |
| 29 | retinal tear   | retinal perforations | C0035321 | postop | retinal hole                                |
| 29 | retinal tear   | retinal perforations | C0035321 | postop | retinal holes                               |
| 29 | retinal tear   | retinal perforations | C0035321 | postop | break, retinal                              |
| 29 | retinal tear   | retinal perforations | C0035321 | postop | retinal dialysis                            |
| 29 | retinal tear   | retinal perforations | C0035321 | postop | hole, retinal                               |
| 29 | retinal tear   | retinal perforations | C0035321 | postop | tears, retinal                              |
| 29 | retinal tear   | retinal perforations | C0035321 | postop | tear, retinal                               |
| 29 | retinal tear   | retinal perforations | C0035321 | postop | holes, retinal                              |
| 29 | retinal tear   | retinal perforations | C0035321 | postop | retinal perforation                         |
| 29 | retinal tear   | retinal perforations | C0035321 | postop | retinal dialyses                            |
| 29 | retinal tear   | retinal perforations | C0035321 | postop | hole in retina                              |
| 29 | retinal tear   | retinal perforations | C0035321 | postop | horseshoe tear of retina                    |
| 29 | retinal tear   | retinal perforations | C0035321 | postop | horseshoe tear of retina without detachment |
| 29 | retinal tear   | retinal perforations | C0035321 | postop | giant retinal tear                          |
| 29 | retinal tear   | retinal perforations | C0035321 | postop | retinal operculated tear                    |

|    |            |                |          |      |                                    |
|----|------------|----------------|----------|------|------------------------------------|
| 30 | cortisol   | hydrocortisone | C0020268 | risk | hydrocortisone ophthalmic ointment |
| 30 | cortisol   | hydrocortisone | C0020268 | risk | proctocare-hc                      |
| 30 | cortisol   | hydrocortisone | C0020268 | risk | rederm                             |
| 30 | cortisol   | hydrocortisone | C0020268 | risk | cortisporin ophthalmic             |
| 30 | cortisol   | hydrocortisone | C0020268 | risk | solu-cortef                        |
| 30 | cortisol   | hydrocortisone | C0020268 | risk | proctocort                         |
| 30 | cortisol   | hydrocortisone | C0020268 | risk | hydrocortone                       |
| 30 | cortisol   | hydrocortisone | C0020268 | risk | cortef                             |
| 30 | cortisol   | hydrocortisone | C0020268 | risk | cortenema                          |
| 30 | cortisol   | hydrocortisone | C0020268 | risk | anusol hc                          |
| 30 | cortisol   | hydrocortisone | C0020268 | risk | proctocream-hc                     |
| 30 | cortisol   | hydrocortisone | C0020268 | risk | cortisporin otic                   |
| 30 | prednisone | prednisone     | C0032952 | risk | prednisone                         |
| 30 | prednisone | prednisone     | C0032952 | risk | pred                               |
| 30 | prednisone | prednisone     | C0032952 | risk | prednisone preparation             |
| 30 | prednisone | prednisone     | C0032952 | risk | prednisone 5 mg                    |
| 30 | prednisone | prednisone     | C0032952 | risk | prednisone 5mg                     |
| 30 | prednisone | prednisone     | C0032952 | risk | prednisone 5 mg oral tablet        |
| 30 | prednisone | prednisone     | C0032952 | risk | prednisone tablets 5 mg            |
| 30 | prednisone | prednisone     | C0032952 | risk | prednisone 5mg tablet              |
| 30 | prednisone | prednisone     | C0032952 | risk | prednisone 8 mg                    |
| 30 | prednisone | prednisone     | C0032952 | risk | prednisone 40 mg                   |
| 30 | prednisone | prednisone     | C0032952 | risk | prednisone 30 mg                   |
| 30 | prednisone | prednisone     | C0032952 | risk | prednisone 100 mg                  |
| 30 | prednisone | prednisone     | C0032952 | risk | prednisone oral solution           |
| 30 | prednisone | prednisone     | C0032952 | risk | prednisone 2 mg                    |
| 30 | prednisone | prednisone     | C0032952 | risk | prednisone 10 mg                   |
| 30 | prednisone | prednisone     | C0032952 | risk | prednisone 10 mg oral tablet       |
| 30 | prednisone | prednisone     | C0032952 | risk | prednisone 10mg tab                |
| 30 | prednisone | prednisone     | C0032952 | risk | prednisone 10mg tablet             |
| 30 | prednisone | prednisone     | C0032952 | risk | prednisone 1 mg                    |
| 30 | prednisone | prednisone     | C0032952 | risk | prednisone 1 mg oral tablet        |
| 30 | prednisone | prednisone     | C0032952 | risk | prednisone 50 mg                   |
| 30 | prednisone | prednisone     | C0032952 | risk | prednisone 50 mg oral tablet       |
| 30 | prednisone | prednisone     | C0032952 | risk | prednisone 5 mg/ml                 |
| 30 | prednisone | prednisone     | C0032952 | risk | prednisone 5 mg/ml oral solution   |
| 30 | prednisone | prednisone     | C0032952 | risk | prednisone 25 mg                   |
| 30 | prednisone | prednisone     | C0032952 | risk | prednisone 20 mg                   |
| 30 | prednisone | prednisone     | C0032952 | risk | prednisone 20 mg oral tablet       |
| 30 | prednisone | prednisone     | C0032952 | risk | prednisone 20mg tablet             |
| 30 | prednisone | prednisone     | C0032952 | risk | prednisone 20mg tab                |

|    |              |              |          |      |                                             |
|----|--------------|--------------|----------|------|---------------------------------------------|
| 30 | prednisone   | prednisone   | C0032952 | risk | prednisone 2.5 mg                           |
| 30 | prednisone   | prednisone   | C0032952 | risk | prednisone 2.5 mg oral tablet               |
| 30 | prednisone   | prednisone   | C0032952 | risk | prednisone 1 mg/ml                          |
| 30 | prednisone   | prednisone   | C0032952 | risk | prednisone 5 mg/5 ml oral solution          |
| 30 | prednisone   | prednisone   | C0032952 | risk | prednisone intensol                         |
| 30 | prednisone   | prednisone   | C0032952 | risk | orasone                                     |
| 30 | prednisone   | prednisone   | C0032952 | risk | meticorten                                  |
| 30 | prednisone   | prednisone   | C0032952 | risk | sterapred ds                                |
| 30 | prednisone   | prednisone   | C0032952 | risk | sterapred                                   |
| 30 | prednisolone | prednisolone | C0032950 | risk | prednisolone                                |
| 30 | prednisolone | prednisolone | C0032950 | risk | delta-f                                     |
| 30 | prednisolone | prednisolone | C0032950 | risk | prednisolone preparation                    |
| 30 | prednisolone | prednisolone | C0032950 | risk | prednisolone sodium phosphate               |
| 30 | prednisolone | prednisolone | C0032950 | risk | prednisolone phosphate                      |
| 30 | prednisolone | prednisolone | C0032950 | risk | prednisolone acetate                        |
| 30 | prednisolone | prednisolone | C0032950 | risk | prednisolone oral suspension                |
| 30 | prednisolone | prednisolone | C0032950 | risk | prednisolone 30 mg                          |
| 30 | prednisolone | prednisolone | C0032950 | risk | prednisolone 15 mg                          |
| 30 | prednisolone | prednisolone | C0032950 | risk | prednisolone 10 mg                          |
| 30 | prednisolone | prednisolone | C0032950 | risk | prednisolone 2 mg                           |
| 30 | prednisolone | prednisolone | C0032950 | risk | prednisolone ophthalmic solution            |
| 30 | prednisolone | prednisolone | C0032950 | risk | prednisolone oral solution                  |
| 30 | prednisolone | prednisolone | C0032950 | risk | prednisolone ophthalmic suspension          |
| 30 | prednisolone | prednisolone | C0032950 | risk | prednisolone ophthalmic ointment            |
| 30 | prednisolone | prednisolone | C0032950 | risk | prednisolone 50 mg                          |
| 30 | prednisolone | prednisolone | C0032950 | risk | prednisolone 20 mg                          |
| 30 | prednisolone | prednisolone | C0032950 | risk | prednisolone 100 mg                         |
| 30 | prednisolone | prednisolone | C0032950 | risk | prednisolone 2.5 mg                         |
| 30 | prednisolone | prednisolone | C0032950 | risk | prednisolone 25 mg                          |
| 30 | prednisolone | prednisolone | C0032950 | risk | prednisolone 1 mg                           |
| 30 | prednisolone | prednisolone | C0032950 | risk | prednisolone 5 mg/ml                        |
| 30 | prednisolone | prednisolone | C0032950 | risk | prednisolone 1 mg/ml                        |
| 30 | prednisolone | prednisolone | C0032950 | risk | prednisolone acetate 1% oph susp            |
| 30 | prednisolone | prednisolone | C0032950 | risk | prednisolone acetate 1% eye drops           |
| 30 | prednisolone | prednisolone | C0032950 | risk | prednisolone 3 mg/ml                        |
| 30 | prednisolone | prednisolone | C0032950 | risk | prednisolone 15 mg per 5 ml oral suspension |
| 30 | prednisolone | prednisolone | C0032950 | risk | prednisolone 15 mg per 5 ml oral solution   |
| 30 | prednisolone | prednisolone | C0032950 | risk | prednisolone syrup 15 mg/5ml                |
| 30 | prednisolone | prednisolone | C0032950 | risk | prednisolone 15 mg/5 ml oral syrup          |

|    |                    |                    |          |      |                                      |
|----|--------------------|--------------------|----------|------|--------------------------------------|
| 30 | prednisolone       | prednisolone       | C0032950 | risk | prednisolone 5 mg                    |
| 30 | prednisolone       | prednisolone       | C0032950 | risk | prednisolone 5 mg oral tablet        |
| 30 | prednisolone       | prednisolone       | C0032950 | risk | omnipred                             |
| 30 | prednisolone       | prednisolone       | C0032950 | risk | bubbli-pred                          |
| 30 | prednisolone       | prednisolone       | C0032950 | risk | orapred                              |
| 30 | prednisolone       | prednisolone       | C0032950 | risk | orapred 15 mg per 5 ml oral solution |
| 30 | prednisolone       | prednisolone       | C0032950 | risk | prelone                              |
| 30 | prednisolone       | prednisolone       | C0032950 | risk | prednisol                            |
| 30 | prednisolone       | prednisolone       | C0032950 | risk | predalone 50                         |
| 30 | prednisolone       | prednisolone       | C0032950 | risk | pred-g                               |
| 30 | prednisolone       | prednisolone       | C0032950 | risk | pediapred                            |
| 30 | prednisolone       | prednisolone       | C0032950 | risk | medicort                             |
| 30 | prednisolone       | prednisolone       | C0032950 | risk | inflamase forte                      |
| 30 | prednisolone       | prednisolone       | C0032950 | risk | econopred plus                       |
| 30 | prednisolone       | prednisolone       | C0032950 | risk | econopred                            |
| 30 | prednisolone       | prednisolone       | C0032950 | risk | cetapred                             |
| 30 | prednisolone       | prednisolone       | C0032950 | risk | blephamide                           |
| 30 | prednisolone       | prednisolone       | C0032950 | risk | pred mild                            |
| 30 | prednisolone       | prednisolone       | C0032950 | risk | pred forte                           |
| 30 | prednisolone       | prednisolone       | C0032950 | risk | ak-pred                              |
| 30 | prednisolone       | prednisolone       | C0032950 | risk | vasocidin                            |
| 30 | methylprednisolone | methylprednisolone | C0025815 | risk | methylprednisolone                   |
| 30 | methylprednisolone | methylprednisolone | C0025815 | risk | methylprednisolone acetate           |
| 30 | methylprednisolone | methylprednisolone | C0025815 | risk | methylprednisolone tablets           |
| 30 | methylprednisolone | methylprednisolone | C0025815 | risk | methylprednisolone 1.5 mg            |
| 30 | methylprednisolone | methylprednisolone | C0025815 | risk | methylprednisolone 100 mg            |
| 30 | methylprednisolone | methylprednisolone | C0025815 | risk | methylprednisolone 40 mg             |
| 30 | methylprednisolone | methylprednisolone | C0025815 | risk | methylprednisolone 40 mg/ml          |
| 30 | methylprednisolone | methylprednisolone | C0025815 | risk | methylprednisolone 4 mg              |
| 30 | methylprednisolone | methylprednisolone | C0025815 | risk | methylprednisolone 16 mg             |
| 30 | methylprednisolone | methylprednisolone | C0025815 | risk | methylprednisolone 8 mg              |
| 30 | methylprednisolone | methylprednisolone | C0025815 | risk | methylprednisolone 32 mg             |
| 30 | methylprednisolone | methylprednisolone | C0025815 | risk | methylprednisolone 24 mg             |
| 30 | methylprednisolone | methylprednisolone | C0025815 | risk | methylprednisolone 2 mg              |
| 30 | methylprednisolone | methylprednisolone | C0025815 | risk | methylpred                           |
| 30 | methylprednisolone | methylprednisolone | C0025815 | risk | solu-medrol                          |
| 30 | methylprednisolone | methylprednisolone | C0025815 | risk | solumedrol                           |
| 30 | methylprednisolone | methylprednisolone | C0025815 | risk | medrol                               |
| 30 | methylprednisolone | methylprednisolone | C0025815 | risk | medrol 24 mg oral tablet             |
| 30 | methylprednisolone | methylprednisolone | C0025815 | risk | depo-medrol                          |
| 30 | dexamethasone      | dexamethasone      | C0011777 | risk | dexamethasone                        |

|    |               |               |          |      |                                             |
|----|---------------|---------------|----------|------|---------------------------------------------|
| 30 | dexamethasone | dexamethasone | C0011777 | risk | desamethasone                               |
| 30 | dexamethasone | dexamethasone | C0011777 | risk | dexamethasone phosphate                     |
| 30 | dexamethasone | dexamethasone | C0011777 | risk | dexamethasone sodium phosphate              |
| 30 | dexamethasone | dexamethasone | C0011777 | risk | dexamethasone acetate                       |
| 30 | dexamethasone | dexamethasone | C0011777 | risk | dexamethasone 0.7 mg                        |
| 30 | dexamethasone | dexamethasone | C0011777 | risk | dexamethasone 2 mg/ml                       |
| 30 | dexamethasone | dexamethasone | C0011777 | risk | dexamethasone 0.5 mg/ml                     |
| 30 | dexamethasone | dexamethasone | C0011777 | risk | dexamethasone 8 mg                          |
| 30 | dexamethasone | dexamethasone | C0011777 | risk | dexamethasone 2.2 mg                        |
| 30 | dexamethasone | dexamethasone | C0011777 | risk | dexamethasone topical solution              |
| 30 | dexamethasone | dexamethasone | C0011777 | risk | dexamethasone ophthalmic solution           |
| 30 | dexamethasone | dexamethasone | C0011777 | risk | dexamethasone tablets                       |
| 30 | dexamethasone | dexamethasone | C0011777 | risk | dexamethasone oral solution                 |
| 30 | dexamethasone | dexamethasone | C0011777 | risk | dexamethasone ophthalmic suspension         |
| 30 | dexamethasone | dexamethasone | C0011777 | risk | dexamethasone 10 mg                         |
| 30 | dexamethasone | dexamethasone | C0011777 | risk | dexamethasone 4 mg/ml                       |
| 30 | dexamethasone | dexamethasone | C0011777 | risk | dexamethasone 0.75 mg                       |
| 30 | dexamethasone | dexamethasone | C0011777 | risk | dexamethasone 0.15 mg                       |
| 30 | dexamethasone | dexamethasone | C0011777 | risk | dexamethasone 0.4 mg                        |
| 30 | dexamethasone | dexamethasone | C0011777 | risk | dexamethasone 10 mg/ml                      |
| 30 | dexamethasone | dexamethasone | C0011777 | risk | dexamethasone 1 mg/ml                       |
| 30 | dexamethasone | dexamethasone | C0011777 | risk | dexamethasone 0.1%                          |
| 30 | dexamethasone | dexamethasone | C0011777 | risk | dexamethasone 0.1% solution                 |
| 30 | dexamethasone | dexamethasone | C0011777 | risk | dexamethasone 1 mg/ml oral concentrate      |
| 30 | dexamethasone | dexamethasone | C0011777 | risk | dexamethasone 0.1% eye drops                |
| 30 | dexamethasone | dexamethasone | C0011777 | risk | dexamethasone 2 mg                          |
| 30 | dexamethasone | dexamethasone | C0011777 | risk | dexamethasone 6 mg                          |
| 30 | dexamethasone | dexamethasone | C0011777 | risk | dexamethasone 4 mg                          |
| 30 | dexamethasone | dexamethasone | C0011777 | risk | dexamethasone 4 mg oral tablet              |
| 30 | dexamethasone | dexamethasone | C0011777 | risk | dexamethasone 1.5 mg                        |
| 30 | dexamethasone | dexamethasone | C0011777 | risk | dexamethasone 1 mg                          |
| 30 | dexamethasone | dexamethasone | C0011777 | risk | dexamethasone 1 mg oral tablet              |
| 30 | dexamethasone | dexamethasone | C0011777 | risk | dexamethasone 0.5 mg                        |
| 30 | dexamethasone | dexamethasone | C0011777 | risk | dexamethasone 0.25 mg                       |
| 30 | dexamethasone | dexamethasone | C0011777 | risk | dexamethasone 0.1 mg/ml                     |
| 30 | dexamethasone | dexamethasone | C0011777 | risk | dexamethasone 0.5 mg per 5 ml oral solution |
| 30 | dexamethasone | dexamethasone | C0011777 | risk | dexamethasone ophthalmic ointment           |
| 30 | dexamethasone | dexamethasone | C0011777 | risk | dexium                                      |

|    |               |               |          |      |                                      |
|----|---------------|---------------|----------|------|--------------------------------------|
| 30 | dexamethasone | dexamethasone | C0011777 | risk | ozurdex                              |
| 30 | dexamethasone | dexamethasone | C0011777 | risk | ocu-trol                             |
| 30 | dexamethasone | dexamethasone | C0011777 | risk | decadron                             |
| 30 | dexamethasone | dexamethasone | C0011777 | risk | tobradex                             |
| 30 | dexamethasone | dexamethasone | C0011777 | risk | poly-dex                             |
| 30 | dexamethasone | dexamethasone | C0011777 | risk | neo-dex                              |
| 30 | dexamethasone | dexamethasone | C0011777 | risk | methadex                             |
| 30 | dexamethasone | dexamethasone | C0011777 | risk | dexasporin                           |
| 30 | dexamethasone | dexamethasone | C0011777 | risk | dexamethasone intensol               |
| 30 | dexamethasone | dexamethasone | C0011777 | risk | dexacine                             |
| 30 | dexamethasone | dexamethasone | C0011777 | risk | dexacidin                            |
| 30 | dexamethasone | dexamethasone | C0011777 | risk | decadron la                          |
| 30 | dexamethasone | dexamethasone | C0011777 | risk | decadron-la                          |
| 30 | dexamethasone | dexamethasone | C0011777 | risk | ak-trol                              |
| 30 | dexamethasone | dexamethasone | C0011777 | risk | dexone                               |
| 30 | dexamethasone | dexamethasone | C0011777 | risk | maxidex                              |
| 30 | dexamethasone | dexamethasone | C0011777 | risk | dexasone                             |
| 30 | dexamethasone | dexamethasone | C0011777 | risk | hexadrol                             |
| 30 | dexamethasone | dexamethasone | C0011777 | risk | maxitrol                             |
| 30 | dexamethasone | dexamethasone | C0011777 | risk | maxitrol ophthalmic ointment         |
| 30 | dexamethasone | dexamethasone | C0011777 | risk | decadron phosphate                   |
| 30 | betamethasone | betamethasone | C0005308 | risk | betamethasone                        |
| 30 | betamethasone | betamethasone | C0005308 | risk | flubenisolone                        |
| 30 | betamethasone | betamethasone | C0005308 | risk | betamethasone valerate               |
| 30 | betamethasone | betamethasone | C0005308 | risk | augmented betamethasone dipropionate |
| 30 | betamethasone | betamethasone | C0005308 | risk | betamethasone sodium phosphate       |
| 30 | betamethasone | betamethasone | C0005308 | risk | betamethasone dipropionate           |
| 30 | betamethasone | betamethasone | C0005308 | risk | betamethasone acetate                |
| 30 | betamethasone | betamethasone | C0005308 | risk | betamethasone 6 mg                   |
| 30 | betamethasone | betamethasone | C0005308 | risk | betamethasone 0.3 mg                 |
| 30 | betamethasone | betamethasone | C0005308 | risk | betamethasone 2 mg                   |
| 30 | betamethasone | betamethasone | C0005308 | risk | betamethasone oral solution          |
| 30 | betamethasone | betamethasone | C0005308 | risk | betamethasone 6 mg/ml                |
| 30 | betamethasone | betamethasone | C0005308 | risk | betamethasone 0.25 mg                |
| 30 | betamethasone | betamethasone | C0005308 | risk | betamethasone 0.5 mg                 |
| 30 | betamethasone | betamethasone | C0005308 | risk | betamethasone 1 mg                   |
| 30 | betamethasone | betamethasone | C0005308 | risk | celestone phosphate                  |
| 30 | betamethasone | betamethasone | C0005308 | risk | celestone                            |
| 30 | betamethasone | betamethasone | C0005308 | risk | celestone soluspan                   |
| 30 | triamcinolone | triamcinolone | C0040864 | risk | triamcinolone preparation            |
| 30 | triamcinolone | triamcinolone | C0040864 | risk | triamcinolone hexacetonide           |



|     |                  |                               |          |      |                                     |
|-----|------------------|-------------------------------|----------|------|-------------------------------------|
| 30  | triamcinolone    | triamcinolone                 | C0040864 | risk | triamcinolone acetonide             |
| 30  | triamcinolone    | triamcinolone                 | C0040864 | risk | triamcinolone hexacetonide 20 mg/ml |
| 30  | triamcinolone    | triamcinolone                 | C0040864 | risk | triamcinolone acetonide 40 mg/ml    |
| 30  | triamcinolone    | triamcinolone                 | C0040864 | risk | triamcinolone nasal inhaler         |
| 30  | triamcinolone    | triamcinolone                 | C0040864 | risk | triamcinolone metered dose inhaler  |
| 30  | triamcinolone    | triamcinolone                 | C0040864 | risk | triamcinolone 0.5 mg                |
| 30  | triamcinolone    | triamcinolone                 | C0040864 | risk | triamcinolone 0.025 mg              |
| 30  | triamcinolone    | triamcinolone                 | C0040864 | risk | triamcinolone nasal spray           |
| 30  | triamcinolone    | triamcinolone                 | C0040864 | risk | triamcinolone 4 mg                  |
| 30  | triamcinolone    | triamcinolone                 | C0040864 | risk | triamcinolone 4 mg/ml               |
| 30  | triamcinolone    | triamcinolone                 | C0040864 | risk | triamcinolone 2 mg                  |
| 30  | triamcinolone    | triamcinolone                 | C0040864 | risk | triamcinolone acetonide injection   |
| 30  | triamcinolone    | triamcinolone                 | C0040864 | risk | cenocort                            |
| 30  | triamcinolone    | triamcinolone                 | C0040864 | risk | tramacort                           |
| 30  | triamcinolone    | triamcinolone                 | C0040864 | risk | triesence                           |
| 30  | triamcinolone    | triamcinolone                 | C0040864 | risk | tri-nasal                           |
| 30  | triamcinolone    | triamcinolone                 | C0040864 | risk | trilog                              |
| 30  | triamcinolone    | triamcinolone                 | C0040864 | risk | tri-med                             |
| 30  | triamcinolone    | triamcinolone                 | C0040864 | risk | tri-kort                            |
| 30  | triamcinolone    | triamcinolone                 | C0040864 | risk | amcort                              |
| 30  | triamcinolone    | triamcinolone                 | C0040864 | risk | aristospan                          |
| 30  | triamcinolone    | triamcinolone                 | C0040864 | risk | azmacort                            |
| 30  | triamcinolone    | triamcinolone                 | C0040864 | risk | kenalog                             |
| 30  | triamcinolone    | triamcinolone                 | C0040864 | risk | nasacort                            |
| 30  | beclometasone    | beclomethasone                | C0004905 | risk | beclomethasone dipropionate         |
| 30  | beclometasone    | beclomethasone                | C0004905 | risk | beclomethasone nasal inhaler        |
| 30  | beclometasone    | beclomethasone                | C0004905 | risk | beclomethasone metered dose inhaler |
| 30  | beclometasone    | beclomethasone                | C0004905 | risk | beclomethasone nasal spray          |
| 30  | beclometasone    | beclomethasone                | C0004905 | risk | qvar                                |
| 30  | beclometasone    | beclomethasone                | C0004905 | risk | ventolair                           |
| 30  | beclometasone    | beclomethasone                | C0004905 | risk | qvar inhaler 80 mcg                 |
| 30  | beclometasone    | beclomethasone                | C0004905 | risk | vanceryl                            |
| 30  | beclometasone    | beclomethasone                | C0004905 | risk | vancenase                           |
| 30  | beclometasone    | beclomethasone                | C0004905 | risk | beclovent                           |
| 30  | beclometasone    | beclomethasone                | C0004905 | risk | beconase                            |
| 30  | beclometasone    | beclomethasone                | C0004905 | risk | becloforte                          |
| 30  | beclometasone    | beclomethasone                | C0004905 | risk | becotide                            |
| 30  | beclometasone    | beclomethasone                | C0004905 | risk | becodisk                            |
| 101 | fuchs hcic       | fuchs' heterochromic cyclitis | C0016782 | risk | fuchs uveitis syndrome              |
| 102 | intraocular surg | intraocular refractive        | C1533034 | risk | bioptics                            |

|     |                           |                                                   |          |              |                                             |
|-----|---------------------------|---------------------------------------------------|----------|--------------|---------------------------------------------|
|     |                           | surgery                                           |          |              |                                             |
| 102 | intraocular surg          | intraocular refractive surgery                    | C1533034 | risk         | clear lens extraction                       |
| 103 | anterior vitrectomy       | excision of vitreous opacity by anterior approach | C0197786 | intra        | anterior vitrectomy                         |
| 104 | ifis                      | intraoperative floppy iris syndrome               | C1688637 | "risk/intra" | intraoperative floppy iris syndrome         |
| 104 | ifis                      | floppy iris syndrome                              | C1735601 | risk/intra   | floppy iris syndrome                        |
| 105 | retrobulbar hemorrhage    | retrobulbar hemorrhage                            | C0302497 | intra        | retrobulbar hematoma                        |
| 106 | suprachoroidal hemorrhage | suprachoroidal hemorrhage                         | C1644185 | "intra"      | suprachoroidal hemorrhage                   |
| 107 | pars plana vitrectomy     | mechanical vitrectomy by pars plana approach      | C0563537 | post         | pars plana vitrectomy                       |
| 108 | pars plana lensectomy     | pars plana lensectomy                             | C0395529 | post         | pars plana lensectomy                       |
| 108 | pars plana lensectomy     | pars plana lensectomy                             | C0395529 | post         | pars plana lensectomy                       |
| 109 | lens dislocation          | lens dislocation                                  | C0023309 | post         | lens dislocation                            |
| 109 | lens exchange             | exchange of intraocular lens                      | C0339027 | post         | lens exchange                               |
| 109 | secondary IOL             | secondary lens implant                            | C0455248 | post         | secondary lens implantation                 |
| 110 | lamellar keratoplasty     | lamellar keratoplasty                             | C0022591 | risk/post    | corneal transplant                          |
| 110 | lamellar keratoplasty     | lamellar keratoplasty                             | C0022591 | risk/post    | deep lamellar keratoplasty                  |
| 110 | lamellar keratoplasty     | lamellar keratoplasty                             | C0022591 | risk/post    | descemet stripping endothelial keratoplasty |
| 110 | keratectomy               | cornea excision                                   | C0197409 | risk/post    | keratectomy                                 |
| 110 | keratectomy               | cornea excision                                   | C0197409 | risk/post    | corneal lesion removal                      |
| 110 | keratectomy               | cornea excision                                   | C0197409 | risk/post    | superficial keratectomy                     |
| 110 | keratorefractive surgery  | refractive keratoplasty                           | C0197447 | risk/post    | radial keratotomy                           |
| 110 | keratorefractive surgery  | refractive keratoplasty                           | C0197447 | risk/post    | epikeratoplasty                             |
| 110 | keratorefractive surgery  | refractive keratoplasty                           | C0197447 | risk/post    | keratorefractive surgery                    |
| 110 | keratorefractive surgery  | refractive keratoplasty                           | C0197447 | risk/post    | keratomileusis                              |
| 110 | keratorefractive surgery  | refractive keratoplasty                           | C0197447 | risk/post    | corneal relaxing incision                   |
| 110 | keratorefractive surgery  | refractive keratoplasty                           | C0197447 | risk/post    | lasik                                       |
| 110 | keratorefractive surgery  | refractive keratoplasty                           | C0197447 | risk/post    | limbal relaxing incision                    |
| 110 | keratorefractive surgery  | refractive keratoplasty                           | C0197447 | risk/post    | conductive keratoplasty                     |
| 110 | keratorefractive surgery  | refractive keratoplasty                           | C0197447 | risk/post    | lasek                                       |
| 110 | keratorefractive surgery  | refractive keratoplasty                           | C0197447 | risk/post    | arcuate keratotomy                          |

|     |                          |                         |          |           |                                              |
|-----|--------------------------|-------------------------|----------|-----------|----------------------------------------------|
| 110 | keratorefractive surgery | refractive keratoplasty | C0197447 | risk/post | photorefractive keratectomy enhancement      |
| 110 | keratorefractive surgery | refractive keratoplasty | C0197447 | risk/post | wavefront-guided photorefractive keratectomy |
| 110 | keratorefractive surgery | refractive keratoplasty | C0197447 | risk/post | epi-lasik                                    |
| 112 | wound leak               | wound discharge finding | C0406834 | post      | wound leak                                   |
| 112 | wound leak               | wound discharge finding | C0406834 | post      | purulent discharge from wound                |
