# Supplementary material
Source: PubMed Central journal article supplement (PMC4930873)
Supplement: NIHMS796796-supplement-Table_S4.pdf [file NIHMS796796-supplement-Table_S4.pdf]

**Table S4 - Characteristics and outcomes of the multivariate regression models for intraoperative and postoperative complications using all risk factors in the model**

| Intraoperative Complications | Number of Recorded Complications | Cohort Size (excluding those with a prior mention of this complication) |
|------------------------------|----------------------------------|-------------------------------------------------------------------------|
| ant_vit                      | 128                              | 8382                                                                    |
| any_intra                    | 214                              | 8382                                                                    |
| catar_comp                   | 768                              | 8382                                                                    |
| drop_retain_lens             | 76                               | 8382                                                                    |
| ifis_iris_defect             | 45                               | 8348                                                                    |
| pc_tear                      | 35                               | 8382                                                                    |
|                              |                                  |                                                                         |
| Postoperative Complications  | Number of Recorded Complications | Cohort Size (excluding those with a prior mention of this complication) |
| anterior_comps               | 233                              | 8382                                                                    |
| any_lens                     | 896                              | 8382                                                                    |
| any_post                     | 692                              | 8382                                                                    |
| cme                          | 160                              | 8382                                                                    |
| corneal_edema                | 81                               | 8302                                                                    |
| glauc_any                    | 175                              | 6379                                                                    |
| iol                          | 116                              | 8382                                                                    |
| lens_sublux                  | 13                               | 8297                                                                    |
| pars_plana                   | 107                              | 8382                                                                    |
| pco_yag                      | 406                              | 8382                                                                    |
| posterior_comps              | 237                              | 8382                                                                    |
| refract_surg                 | 277                              | 7993                                                                    |
| ret_repair                   | 107                              | 7224                                                                    |
| vittr_tap_endop              | 82                               | 8382                                                                    |
| wound_leak                   | 39                               | 8382                                                                    |

**Intraoperative Complications**

**ORs**

|             | ant_vit.1 | any_intra.1 | catar_comp.1 | drop_retain_lens.1 | pc_tear.1 |
|-------------|-----------|-------------|--------------|--------------------|-----------|
| 40-45 years | 0         | 0.77        | 1.55         | 1.47               | 0         |
| 46-50 years | 1.07      | 0.81        | 0.81         | 1.18               | 1.59      |

|                                |      |      |      |      |      |
|--------------------------------|------|------|------|------|------|
| 51-55 years                    | 1.95 | 2.26 | 0.92 | 3.11 | 4.39 |
| 56-60 years                    | 0.91 | 0.9  | 1.04 | 1.02 | 0    |
| 61-65 years                    | 1    | 1.01 | 0.96 | 1.03 | 0.24 |
| 71-75 years                    | 0.69 | 0.68 | 0.75 | 0.41 | 0.34 |
| 76-80 years                    | 0.77 | 0.77 | 0.69 | 0.89 | 1.11 |
| 81-85 years                    | 1.15 | 0.96 | 0.79 | 0.76 | 0.62 |
| 86+ years                      | 1.1  | 1.08 | 0.74 | 1.02 | 0.98 |
| Alpha Blockers                 | 1.5  | 2.36 | 2.05 | 0.42 | 0.62 |
| ARMD                           | 1.3  | 1.23 | 1.67 | 0.98 | 0.65 |
| Charlson Score                 | 1    | 1.03 | 1    | 1.03 | 1.04 |
| Corneal Arcus/Scarring         | 1.34 | 1.05 | 1.21 | 1.18 | 0    |
| Corneal Edema                  | 1.16 | 0.5  | 1.73 | 0.89 | 6.32 |
| Diabetes                       | 1.28 | 1.22 | 2    | 1.39 | 2.78 |
| Eye Trauma                     | 2.2  | 1.52 | 1.69 | 0.71 | 1.37 |
| Fuch's Dystrophy               | 0.73 | 1.47 | 1.41 | 0    | 0    |
| Male                           | 1.05 | 1.29 | 1.2  | 1.08 | 0.54 |
| Glaucoma                       | 1.27 | 1.36 | 1.26 | 1.06 | 0.9  |
| Hyperopia                      | 0.49 | 0.71 | 1.95 | 0.24 | 0.56 |
| Prior IFIS/Iris Damage         | 0    | 0    | 2.3  | 0    | 0    |
| Intraocular Surgery            | 1.06 | 0.91 | 0.59 | 0.68 | 1.32 |
| Intravitreal Injection         | 1.23 | 1.04 | 1.26 | 0.91 | 0.41 |
| Lens Subluxation               | 2.13 | 2.41 | 2.32 | 1.51 | 1.58 |
| Myopia                         | 0.79 | 0.88 | 1.43 | 0.74 | 0.18 |
| Nystagmus                      | 0.74 | 1.18 | 1.19 | 1.99 | 3.27 |
| Pseudoexfoliation              | 1.81 | 1.34 | 1.28 | 1.49 | 2.22 |
| Race/Ethnicity - Asian         | 1.26 | 1.06 | 1.15 | 0.96 | 0.89 |
| Race/Ethnicity - Black         | 1.53 | 1.15 | 1.31 | 1.67 | 2.16 |
| Race/Ethnicity - Hispanic      | 0.61 | 0.9  | 1.49 | 1.72 | 1.83 |
| Race/Ethnicity - Other/Unknown | 1.24 | 1.27 | 0.65 | 1.19 | 2.68 |
| Refractive Surgery             | 0.89 | 0.96 | 1.18 | 0.9  | 1.1  |
| Retinal Detachment/Repair      | 0.68 | 1    | 1.65 | 1.21 | 0.95 |

|                        |      |      |      |      |      |
|------------------------|------|------|------|------|------|
| Ophthalmic Steroid Use | 0.26 | 1.47 | 2.04 | 1.15 | 0.47 |
| Prior Cataract Surgery | 0.56 | 0.54 | 0.86 | 0.61 | 1.16 |
| Uveitis                | 0.64 | 1.1  | 1.78 | 1.09 | 0.79 |
| Prior Vitrectomy       | 0.91 | 1.46 | 1.43 | 4.32 | 2.25 |

Intraoperative Complications

P-values

|                        | ant_vit  | any_intra | catar_comp | drop_retain_lens | pc_tear  |
|------------------------|----------|-----------|------------|------------------|----------|
| 40-45 years            | 0.975058 | 0.732982  | 0.192676   | 0.647407         | 0.995341 |
| 46-50 years            | 0.928263 | 0.733851  | 0.517796   | 0.832002         | 0.676362 |
| 51-55 years            | 0.173273 | 0.021979  | 0.74173    | 0.021114         | 0.030342 |
| 56-60 years            | 0.84512  | 0.764476  | 0.851426   | 0.964635         | 0.990097 |
| 61-65 years            | 0.995843 | 0.971218  | 0.826039   | 0.947217         | 0.195727 |
| 66-70 years            | 0.2827   | 0.15488   | 0.045777   | 0.079139         | 0.129483 |
| 71-75 years            | 0.429439 | 0.31585   | 0.008672   | 0.779029         | 0.848656 |
| 76-80 years            | 0.686479 | 0.887606  | 0.139116   | 0.573007         | 0.512257 |
| 81-85 years            | 0.759729 | 0.765467  | 0.053349   | 0.968625         | 0.967027 |
| 86+ years              | 0.267182 | 0.000227  | 3.69E-07   | 0.240817         | 0.65835  |
| Alpha Blockers         | 0.355305 | 0.332059  | 7.71E-06   | 0.968306         | 0.514565 |
| ARMD                   | 0.903246 | 0.290744  | 0.957024   | 0.505102         | 0.624983 |
| Charlson Score         | 0.448705 | 0.882276  | 0.225339   | 0.763705         | 0.990235 |
| Corneal Arcus/Scarring | 0.852215 | 0.3601    | 0.061751   | 0.913844         | 0.045658 |
| Corneal Edema          | 0.232182 | 0.217276  | 8.33E-15   | 0.218197         | 0.0065   |
| Diabetes               | 0.077911 | 0.252891  | 0.011381   | 0.656059         | 0.778902 |
| Eye Trauma             | 0.761906 | 0.532295  | 0.263298   | 0.983074         | 0.994703 |
| Fuch's Dystrophy       | 0.803485 | 0.087563  | 0.035839   | 0.736835         | 0.121307 |
| Male                   |          |           |            |                  |          |

|                                |           |           |            |                  |                     |          |
|--------------------------------|-----------|-----------|------------|------------------|---------------------|----------|
|                                |           | 0.247337  | 0.051228   | 0.011538         | 0.841748            | 0.800868 |
| Glaucoma                       |           | 0.234969  | 0.344917   | 3.64E-06         | 0.158114            | 0.57723  |
| Hyperopia                      |           | 0.982778  | 0.971252   | 0.026215         | 0.989288            | 0.996937 |
| Prior IFIS/Iris Damage         |           | 0.927687  | 0.814574   | 0.029794         | 0.465913            | 0.768996 |
| Intraocular Surgery            |           | 0.687559  | 0.919515   | 0.206332         | 0.85664             | 0.464437 |
| Intravitreal Injection         |           | 0.281269  | 0.03745    | 0.002463         | 0.506963            | 0.699899 |
| Lens Subluxation               |           | 0.501236  | 0.592162   | 0.001119         | 0.465054            | 0.10275  |
| Myopia                         |           | 0.677985  | 0.682176   | 0.420502         | 0.212409            | 0.120694 |
| Nystagmus                      |           | 0.012415  | 0.138416   | 0.027053         | 0.22698             | 0.069249 |
| Pseudoexfoliation              |           | 0.405796  | 0.776951   | 0.230906         | 0.911068            | 0.857806 |
| Race/Ethnicity - Asian         |           | 0.334508  | 0.710324   | 0.200555         | 0.351478            | 0.323148 |
| Race/Ethnicity - Black         |           | 0.411217  | 0.764332   | 0.024213         | 0.227097            | 0.376387 |
| Race/Ethnicity - Hispanic      |           | 0.390471  | 0.218661   | 0.001421         | 0.607768            | 0.017493 |
| Race/Ethnicity - Other/Unknown |           | 0.808151  | 0.905322   | 0.31145          | 0.851051            | 0.910652 |
| Refractive Surgery             |           | 0.305042  | 0.993232   | 1.61E-05         | 0.623834            | 0.936898 |
| Retinal Detachment/Repair      |           | 0.065012  | 0.14028    | 7.36E-09         | 0.76605             | 0.493128 |
| Ophthalmic Steroid Use         |           | 0.001549  | 1.43E-05   | 0.074857         | 0.036551            | 0.68348  |
| Prior Cataract Surgery         |           | 0.460987  | 0.797849   | 0.001673         | 0.874386            | 0.830001 |
| Uveitis                        |           | 0.860018  | 0.295098   | 0.084607         | 0.000664            | 0.274404 |
| Prior Vitrectomy               |           |           |            |                  |                     |          |
| Intraoperative Complications   | 95% CI    |           |            |                  |                     |          |
|                                | ant_vit   | any_intra | catar_comp | drop_retain_lens | pc_tear             |          |
|                                |           |           |            |                  | 0-                  |          |
| 40-45 years                    | 0-1.15    | 0.12-2.73 | 0.78-2.91  | 0.2-6.32         | 7.5277579462208e+48 |          |
| 46-50 years                    | 0.17-3.87 | 0.19-2.37 | 0.42-1.48  | 0.18-4.6         | 0.08-9.91           |          |

|                        |           |           |           |                  |                        |
|------------------------|-----------|-----------|-----------|------------------|------------------------|
| 51-55 years            | 0.68-4.87 | 1.09-4.45 | 0.56-1.48 | 1.14-8.1         | 1.05-16.57             |
| 56-60 years            | 0.32-2.23 | 0.42-1.78 | 0.71-1.5  | 0.32-2.88        | 0-8522435353908058112  |
| 61-65 years            | 0.42-2.22 | 0.54-1.84 | 0.68-1.35 | 0.37-2.68        | 0.01-1.49              |
| 71-75 years            | 0.35-1.37 | 0.4-1.16  | 0.57-1    | 0.14-1.08        | 0.07-1.31              |
| 76-80 years            | 0.41-1.49 | 0.47-1.29 | 0.52-0.91 | 0.4-2.04         | 0.4-3.37               |
| 81-85 years            | 0.59-2.26 | 0.56-1.66 | 0.58-1.08 | 0.27-1.97        | 0.13-2.45              |
| 86+ years              | 0.6-2.09  | 0.66-1.78 | 0.55-1    | 0.45-2.36        | 0.31-3.16              |
| Alpha Blockers         | 0.69-2.91 | 1.46-3.65 | 1.55-2.7  | 0.07-1.43        | 0.03-3.4               |
| ARMD                   | 0.72-2.23 | 0.8-1.86  | 1.33-2.09 | 0.43-2.01        | 0.14-2.03              |
| Charlson Score         | 0.92-1.07 | 0.98-1.09 | 0.97-1.03 | 0.94-1.13        | 0.88-1.17              |
| Corneal Arcus/Scarring | 0.58-2.69 | 0.55-1.84 | 0.88-1.63 | 0.34-3.04        | 0-1.37629470433772e+21 |
| Corneal Edema          | 0.17-4.74 | 0.08-1.8  | 0.96-3.06 | 0.05-4.95        | 0.77-32.61             |
| Diabetes               | 0.85-1.9  | 0.88-1.66 | 1.68-2.39 | 0.82-2.32        | 1.33-5.86              |
| Eye Trauma             | 0.82-4.89 | 0.69-2.98 | 1.11-2.5  | 0.11-2.56        | 0.07-7.73              |
| Fuch's Dystrophy       | 0.04-3.64 | 0.35-4.14 | 0.75-2.54 | 0-38691.44       | 0-5.82551738795354e+44 |
| Male                   | 0.72-1.51 | 0.96-1.73 | 1.01-1.42 | 0.67-1.73        | 0.24-1.14              |
| Glaucoma               | 0.84-1.9  | 0.99-1.86 | 1.05-1.5  | 0.6-1.78         | 0.37-1.99              |
| Hyperopia              | 0.12-1.35 | 0.33-1.36 | 1.47-2.58 | 0.01-1.12        | 0.03-2.87              |
| Prior IFIS/Iris Damage | 0-550.76  | 0-49.49   | 1.09-4.75 | 0-45053258075.96 | 0-1.08844687101689e+76 |
| Intraocular Surgery    | 0.29-3.49 | 0.4-2.03  | 0.36-0.95 | 0.25-1.92        | 0.2-8.62               |
| Intravitreal Injection | 0.4-3.15  | 0.5-1.99  | 0.88-1.79 | 0.3-2.38         | 0.02-3.15              |
| Lens Subluxation       | 0.45-7.54 | 1.01-5.37 | 1.34-3.98 | 0.39-4.68        | 0.07-12.17             |
| Myopia                 | 0.38-1.5  | 0.55-1.37 | 1.15-1.78 | 0.31-1.58        | 0.01-0.94              |

|                                |           |           |           |           |            |
|--------------------------------|-----------|-----------|-----------|-----------|------------|
| Nystagmus                      | 0.12-2.4  | 0.48-2.42 | 0.77-1.8  | 0.57-5.24 | 0.51-11.81 |
| Pseudoexfoliation              | 1.12-2.85 | 0.89-1.96 | 1.03-1.6  | 0.74-2.76 | 0.88-5.02  |
| Race/Ethnicity - Asian         | 0.71-2.12 | 0.68-1.62 | 0.91-1.44 | 0.41-1.98 | 0.2-2.78   |
| Race/Ethnicity - Black         | 0.58-3.38 | 0.5-2.31  | 0.85-1.95 | 0.48-4.4  | 0.33-8.09  |
| Race/Ethnicity - Hispanic      | 0.15-1.69 | 0.4-1.74  | 1.04-2.09 | 0.66-3.93 | 0.39-6.18  |
| Race/Ethnicity - Other/Unknown | 0.74-1.98 | 0.86-1.83 | 0.49-0.84 | 0.59-2.22 | 1.15-5.94  |
| Refractive Surgery             | 0.31-2.04 | 0.46-1.78 | 0.84-1.63 | 0.26-2.36 | 0.15-4.34  |
| Retinal Detachment/Repair      | 0.32-1.36 | 0.62-1.58 | 1.31-2.07 | 0.54-2.57 | 0.21-3.25  |
| Ophthalmic Steroid Use         | 0.04-0.86 | 0.86-2.41 | 1.6-2.6   | 0.43-2.67 | 0.02-2.73  |
| Prior Cataract Surgery         | 0.39-0.8  | 0.41-0.71 | 0.72-1.02 | 0.38-0.97 | 0.57-2.51  |
| Uveitis                        | 0.15-1.81 | 0.51-2.12 | 1.23-2.53 | 0.34-2.82 | 0.04-4.47  |
| Prior Vitrectomy               | 0.28-2.45 | 0.69-2.87 | 0.94-2.13 | 1.75-9.56 | 0.43-8.18  |

Postoperative Complications

ORs

|                                    | anterior_comps.1 | any_lens.1 | any_post.1 | cme.1 | corneal_edema.1 | glauc_any.1 | iol.1 | lens_sublux.1 | pars_plana.1 | pco_yag.1 | posterior_comps.1 | refract_surg.1 | ret_repair.1 | vittr_tap_endop.1 | wound_leak.1 |
|------------------------------------|------------------|------------|------------|-------|-----------------|-------------|-------|---------------|--------------|-----------|-------------------|----------------|--------------|-------------------|--------------|
| 40-45 years                        | 0.72             | 3.69       | 2.53       | 0.79  | 1.34            | 1.1         | 1.94  | 0             | 4.12         | 5.2       | 2.25              | 1.16           | 3.44         | 0.52              | 0            |
| 46-50 years                        | 1.04             | 1.76       | 1.22       | 0.83  | 0               | 1.09        | 1.76  | 0             | 3.21         | 2.32      | 1.04              | 0.65           | 0            | 1.63              | 2.25         |
| 51-55 years                        | 0.42             | 1.2        | 1.05       | 0.87  | 1.18            | 0.42        | 1.05  | 11.09         | 1.39         | 1.95      | 1.02              | 0.86           | 2.26         | 0.62              | 0.64         |
| 56-60 years                        | 0.64             | 1.13       | 0.58       | 0.7   | 1.02            | 0.46        | 2.88  | 12.51         | 1.19         | 1.4       | 0.29              | 0.64           | 0.7          | 0.41              | 1.13         |
| 61-65 years                        | 0.68             | 1.56       | 1.04       | 1.13  | 0.79            | 0.57        | 1.54  | 0             | 1.44         | 2.01      | 0.94              | 0.71           | 1.16         | 1.56              | 1.08         |
| 71-75 years                        | 0.81             | 0.83       | 0.81       | 0.98  | 0.91            | 0.71        | 1.72  | 3.1           | 1.14         | 0.71      | 0.94              | 0.7            | 1.01         | 0.63              | 0.96         |
| 76-80 years                        | 1.06             | 0.83       | 0.76       | 0.83  | 0.62            | 1.02        | 1.59  | 5.48          | 0.83         | 0.71      | 0.86              | 0.9            | 0.71         | 0.79              | 0.81         |
| 81-85 years                        | 1.1              | 0.98       | 1.08       | 0.89  | 1.7             | 0.95        | 2.39  | 5.48          | 1.25         | 0.72      | 0.87              | 1.03           | 0.91         | 0.53              | 0.62         |
| 86+ years                          | 0.97             | 0.72       | 0.86       | 1.25  | 0.83            | 0.96        | 2.11  | 0.05          | 1.29         | 0.49      | 1.14              | 0.66           | 0.94         | 0.53              | 0.46         |
| Alpha Blockers                     | 1.91             | 1.3        | 1.2        | 0.98  | 1.2             | 2.14        | 1.03  | 9.89          | 0.99         | 1.38      | 1.39              | 1.29           | 1.78         | 1.23              | 0.49         |
| Anterior Vitrectomy during Surgery | 4.03             | 2.26       | 0.5        | 1.04  | 5.94            | 1.62        | 11.86 | 26771.87      | 3.22         | 3.41      | 0.47              | 0.59           | 0.26         | 0.84              | 83.72        |
| Any Intraoperative Complication    | 1.42             | 1.3        | 5.83       | 4.29  | 1.84            | 5.18        | 1.4   | 0             | 5.72         | 0.25      | 25.42             | 2.82           | 29.79        | 9.78              | 0.05         |

|                                               |      |      |      |      |      |      |      |        |       |      |      |      |      |      |      |
|-----------------------------------------------|------|------|------|------|------|------|------|--------|-------|------|------|------|------|------|------|
| ARMD                                          | 1.1  | 1.51 | 1.78 | 1.65 | 0.84 | 1.14 | 0.89 | 5.66   | 2.03  | 1.71 | 1.96 | 1.3  | 1.74 | 2.48 | 1.88 |
| Complicated Cataract Surgery                  | 2.05 | 1.28 | 1.51 | 1.78 | 3.22 | 1.54 | 1.21 | 0.25   | 1.39  | 1.49 | 1.41 | 1.34 | 1.91 | 2.16 | 3.21 |
| Charlson Score                                | 0.95 | 0.99 | 1.02 | 1.02 | 0.98 | 0.97 | 1.06 | 1.39   | 1.03  | 0.99 | 1.01 | 0.97 | 1.01 | 0.98 | 0.9  |
| Corneal Arcus/Scarring                        | 1.74 | 1.33 | 1.45 | 1.74 | 2.19 | 1.23 | 0.98 | 0      | 0.87  | 1    | 2.43 | 1.96 | 2.04 | 2.17 | 0.96 |
| Corneal Edema                                 | 0.98 | 0.7  | 0.27 | 0.94 | 1    | 1.17 | 0.45 | 0      | 0.36  | 0.38 | 1.34 | 3.92 | 1.44 | 2.27 | 0.55 |
| Diabetes                                      | 1.22 | 1.27 | 1.36 | 1.8  | 1.66 | 1.13 | 0.76 | 0.22   | 0.89  | 1.36 | 1.71 | 1.35 | 2.06 | 1.91 | 2.01 |
| Dropped Lens/Retained Fragment                | 1.64 | 0.97 | 2.18 | 0.67 | 2.25 | 0.44 | 1.41 | 179.23 | 12.17 | 4.1  | 1.77 | 0.41 | 0.18 | 0.57 | 8.47 |
| Eye Trauma                                    | 0.92 | 1.23 | 0.77 | 0.79 | 0.11 | 0.83 | 0.94 | 0      | 0     | 1.39 | 0.33 | 1.18 | 0    | 0.43 | 2.05 |
| Fuch's Dystrophy                              | 1.93 | 1.35 | 1.39 | 1.77 | 4.3  | 2.28 | 0.68 | 0      | 0     | 0.19 | 1.24 | 3.51 | 3.22 | 6.63 | 0    |
| Male                                          | 0.91 | 1.04 | 1.09 | 1.23 | 0.77 | 0.94 | 1.35 | 0.38   | 1.22  | 0.9  | 1.17 | 1.09 | 1.42 | 1.22 | 0.59 |
| Glaucoma                                      | 0    | 1.14 | 0    | 0.83 | 2.12 | 1    | 1.06 | 0.75   | 0.75  | 1.39 | 1.01 | 1    | 1.29 | 0.78 | 0.91 |
| Hyperopia                                     | 1.27 | 1.05 | 1.78 | 1.62 | 0.98 | 0.94 | 0.77 | 0      | 0.73  | 1.58 | 1.78 | 0.18 | 1.45 | 1.32 | 0.4  |
| IFIS/Iris Damage during Surgery               | 0.44 | 0.81 | 0.24 | 0    | 2.64 | 0.09 | 0.21 | 0      | 0.37  | 3.92 | 0.04 | 0    | 0.02 | 0    | 0    |
| Prior IFIS/Iris Damage                        | 0.47 | 0.83 | 0.79 | 0    | 3.19 | 0    | 7.43 | 0      | 0     | 0.46 | 1.01 | 1    | 1    | 2.5  | 0    |
| Intraocular Surgery                           | 0.86 | 1.23 | 0.29 | 0.76 | 0.4  | 1.06 | 1.5  | 2.32   | 0.27  | 1.45 | 0.58 | 0.73 | 4.6  | 4.96 | 1.26 |
| Intravitreal Injection                        | 1.12 | 0.95 | 0.05 | 1.46 | 0.5  | 1.36 | 0.65 | 5.5    | 2.01  | 1.26 | 0.07 | 1.53 | 1.72 | 0.4  | 1    |
| Lens Subluxation                              | 0.69 | 1.39 | 0    | 0.35 | 3.29 | 1.01 | 3.83 | 1      | 1.88  | 0.85 | 1.73 | 1.32 | 0    | 1.29 | 5.72 |
| Myopia                                        | 1.06 | 1.18 | 1.14 | 1.49 | 0.51 | 1.19 | 0.95 | 1.31   | 0.74  | 1.3  | 1.31 | 0.72 | 1.69 | 0.47 | 0.83 |
| Nystagmus                                     | 0.83 | 1.02 | 0.9  | 0.77 | 0.71 | 1.01 | 1.52 | 7.43   | 0.27  | 0.99 | 0.44 | 1.08 | 0.84 | 0.74 | 0    |
| Posterior Capsule Tear/Rupture during Surgery | 0.7  | 1.6  | 0.45 | 1.05 | 0.48 | 0.92 | 0.63 | 0      | 0.1   | 0.34 | 0.27 | 5.97 | 3.19 | 0.56 | 0    |
| Pseudoexfoliation                             | 1.35 | 1.62 | 1.85 | 1.78 | 1.72 | 1.56 | 1.59 | 0.47   | 1.18  | 3.4  | 1.53 | 0.14 | 1.11 | 2.44 | 0.68 |
| Race/Ethnicity - Asian                        | 0.97 | 0.76 | 0.84 | 0.76 | 0.83 | 0.82 | 1.07 | 0.25   | 1.11  | 1.1  | 1.12 | 0.33 | 1.4  | 1.29 | 0.83 |
| Race/Ethnicity - Black                        | 2.77 | 0.97 | 1.72 | 0.82 | 0.99 | 3.23 | 2.19 | 0      | 3.08  | 1.33 | 1.49 | 0.22 | 1.57 | 2.02 | 1.96 |
| Race/Ethnicity - Hispanic                     | 1.26 | 0.98 | 0.87 | 0.76 | 1.45 | 1.24 | 0.94 | 3.81   | 1.87  | 0.89 | 0.99 | 1.04 | 0.93 | 0.93 | 0.35 |
| Race/Ethnicity - Other/Unknown                | 0.79 | 0.89 | 0.68 | 0.91 | 0.67 | 0.75 | 1.02 | 0.27   | 1.75  | 1.07 | 0.94 | 0.77 | 1.61 | 0.91 | 0.78 |
| Refractive Surgery                            | 1.08 | 7.65 | 4.53 | 2.01 | 1.19 | 0.77 | 1.84 | 12.46  | 2.17  | 1.58 | 2.04 | 1    | 1.12 | 0.96 | 2.16 |
| Retinal Detachment/Repair                     | 1.19 | 1.05 | 0    | 0.85 | 1.65 | 1.02 | 1.35 | 1.1    | 2.37  | 1.1  | 0    | 0.9  | 1    | 1.04 | 1.17 |
| Ophthalmic Steroid Use                        | 1.41 | 0.82 | 1.87 | 1.22 | 1.34 | 1.89 | 0.74 | 0      | 1.05  | 0.71 | 3.44 | 0.31 | 3.15 | 1.06 | 0.62 |
| Prior Cataract Surgery                        | 0.8  | 1.08 | 1    | 0.49 | 0.64 | 0.7  | 0.98 | 0.08   | 0.45  | 1.12 | 0.64 | 1.12 | 0.59 | 0.51 | 0.93 |
| Uveitis                                       | 2.42 | 1.06 | 0.85 | 2.19 | 2.24 | 1.36 | 1.84 | 0      | 1.86  | 1.11 | 1.45 | 0.71 | 0.42 | 2.08 | 6.2  |
| Prior Vitrectomy                              | 2.24 | 1.31 | 1.43 | 2.88 | 2    | 2.38 | 2.46 | 3.19   | 9.01  | 1.19 | 2.97 | 1.05 | 1.4  | 0.72 | 0.2  |





|                                               |          |          |          |          |          |          |          |          |          |          |          |          |          |          |          |
|-----------------------------------------------|----------|----------|----------|----------|----------|----------|----------|----------|----------|----------|----------|----------|----------|----------|----------|
|                                               | 0.962419 | 0.130181 | 0.958745 | 0.33761  | 0.002698 | 1        | 0.792577 | 0.714644 | 0.273058 | 0.005045 | 0.965878 | 0.990054 | 0.262123 | 0.359241 | 0.811495 |
| Glaucoma                                      | 0.462137 | 0.751918 | 0.018331 | 0.111779 | 0.966974 | 0.878438 | 0.619557 | 0.996596 | 0.579422 | 0.017037 | 0.043393 | 0.019027 | 0.36326  | 0.516341 | 0.375163 |
| Hyperopia                                     | 0.45747  | 0.743414 | 0.167831 | 0.97644  | 0.319253 | 0.125497 | 0.228819 | 0.99911  | 0.3491   | 0.091667 | 0.003798 | 0.965368 | 0.011954 | 0.975514 | 0.994217 |
| IFIS/Iris Damage during Surgery               | 0.487224 | 0.722242 | 0.778793 | 0.980977 | 0.168121 | 0.965455 | 0.003091 | 0.999018 | 0.992732 | 0.33053  | 0.99276  | 0.998349 | 0.997242 | 0.40165  | 0.995375 |
| Prior IFIS/Iris Damage                        | 0.716734 | 0.359862 | 0.031935 | 0.494493 | 0.149453 | 0.9026   | 0.398513 | 0.562503 | 0.001671 | 0.20453  | 0.334309 | 0.50535  | 0.006573 | 0.003746 | 0.83384  |
| Intraocular Surgery                           | 0.752905 | 0.811055 | 0.012863 | 0.247098 | 0.216521 | 0.438934 | 0.360468 | 0.115399 | 0.054404 | 0.324286 | 0.027056 | 0.253339 | 0.336916 | 0.111813 | 0.997644 |
| Intravitreal Injection                        | 0.648615 | 0.253389 | 0.990592 | 0.164732 | 0.050451 | 0.98749  | 0.003726 | 1        | 0.215898 | 0.676135 | 0.523819 | 0.643582 | 0.991197 | 0.677567 | 0.059528 |
| Lens Subluxation                              | 0.810492 | 0.143426 | 0.479645 | 0.094649 | 0.086562 | 0.522185 | 0.857696 | 0.785969 | 0.402685 | 0.070414 | 0.253983 | 0.238155 | 0.076685 | 0.053616 | 0.724343 |
| Myopia                                        | 0.682375 | 0.922186 | 0.735808 | 0.621537 | 0.620581 | 0.980623 | 0.443188 | 0.101677 | 0.176166 | 0.965054 | 0.189564 | 0.857857 | 0.789985 | 0.693229 | 0.98996  |
| Nystagmus                                     | 0.711602 | 0.460134 | 0.272437 | 0.963172 | 0.522402 | 0.947509 | 0.652993 | 0.99878  | 0.011156 | 0.297663 | 0.08697  | 0.087549 | 0.315625 | 0.66596  | 0.994239 |
| Posterior Capsule Tear/Rupture during Surgery | 0.170046 | 3.88E-06 | 6.37E-06 | 0.007645 | 0.062275 | 0.067611 | 0.078269 | 0.539565 | 0.607575 | 4.12E-23 | 0.028514 | 4.19E-06 | 0.705357 | 0.001389 | 0.491904 |
| Pseudoexfoliation                             | 0.900674 | 0.028349 | 0.241006 | 0.296103 | 0.601438 | 0.475215 | 0.819503 | 0.29655  | 0.778409 | 0.546867 | 0.584202 | 0.000463 | 0.24339  | 0.425987 | 0.728551 |
| Race/Ethnicity - Asian                        | 0.000765 | 0.891313 | 0.019193 | 0.674987 | 0.981171 | 0.000321 | 0.074906 | 0.996916 | 0.018695 | 0.286093 | 0.256642 | 0.035557 | 0.370457 | 0.168374 | 0.311931 |
| Race/Ethnicity - Black                        | 0.498727 | 0.934215 | 0.598452 | 0.518427 | 0.439483 | 0.592258 | 0.90378  | 0.29287  | 0.179952 | 0.667744 | 0.970406 | 0.895216 | 0.890037 | 0.891007 | 0.342985 |
| Race/Ethnicity - Hispanic                     | 0.290956 | 0.30179  | 0.004558 | 0.710151 | 0.297997 | 0.254898 | 0.941117 | 0.293494 | 0.06185  | 0.674033 | 0.778585 | 0.169593 | 0.081877 | 0.797667 | 0.65611  |
| Race/Ethnicity - Other/Unknown                | 0.799006 | 3.82E-69 | 6.57E-22 | 0.014567 | 0.730537 | 0.520755 | 0.091224 | 0.014638 | 0.056766 | 0.030956 | 0.007709 | 1        | 0.812333 | 0.933792 | 0.175871 |
| Refractive Surgery                            | 0.453892 | 0.697676 | 0.966316 | 0.542002 | 0.139283 | 0.935975 | 0.358366 | 0.921165 | 0.008096 | 0.54312  | 0.950244 | 0.69421  | 1        | 0.919057 | 0.773617 |
| Retinal Detachment/Repair                     | 0.194732 | 0.191201 | 0.013755 | 0.487687 | 0.438691 | 0.037242 | 0.474005 | 0.995844 | 0.896164 | 0.094842 | 5.08E-06 | 0.009168 | 0.001153 | 0.887972 | 0.489086 |
| Ophthalmic Steroid Use                        | 0.126673 | 0.367693 | 0.98054  | 2.62E-05 | 0.06802  | 0.028184 | 0.905914 | 0.002121 | 0.000369 | 0.340291 | 0.002033 | 0.413662 | 0.013452 | 0.004663 | 0.844895 |
| Prior Cataract Surgery                        | 0.014104 | 0.759377 | 0.650343 | 0.017822 | 0.075174 | 0.521    | 0.151517 | 0.99718  | 0.132638 | 0.68362  | 0.294939 | 0.441548 | 0.268952 | 0.108216 | 0.000181 |
| Uveitis                                       | 0.017263 | 0.184952 | 0.244197 | 0.001457 | 0.169185 | 0.023523 | 0.040359 | 0.426102 | 3.26E-10 | 0.510495 | 0.002181 | 0.893484 | 0.548156 | 0.564831 | 0.155114 |
| Prior Vitrectomy                              |          |          |          |          |          |          |          |          |          |          |          |          |          |          |          |

Postoperative Complications

ORs

|                                    | anterior_comps.1 | any_lens.1 | any_post.1 | cme.1 | corneal_edema.1 | glauc_any.1 | iol.1 | lens_sublux.1 | pars_plana.1 | pco_yag.1 | posterior_comps.1 | refract_surg.1 | ret_repair.1 | vittr_tap_endop.1 | wound_leak.1 |
|------------------------------------|------------------|------------|------------|-------|-----------------|-------------|-------|---------------|--------------|-----------|-------------------|----------------|--------------|-------------------|--------------|
| 40-45 years                        | 0.72             | 3.69       | 2.53       | 0.79  | 1.34            | 1.1         | 1.94  | 0             | 4.12         | 5.2       | 2.25              | 1.16           | 3.44         | 0.52              | 0            |
| 46-50 years                        | 1.04             | 1.76       | 1.22       | 0.83  | 0               | 1.09        | 1.76  | 0             | 3.21         | 2.32      | 1.04              | 0.65           | 0            | 1.63              | 2.25         |
| 51-55 years                        | 0.42             | 1.2        | 1.05       | 0.87  | 1.18            | 0.42        | 1.05  | 11.09         | 1.39         | 1.95      | 1.02              | 0.86           | 2.26         | 0.62              | 0.64         |
| 56-60 years                        | 0.64             | 1.13       | 0.58       | 0.7   | 1.02            | 0.46        | 2.88  | 12.51         | 1.19         | 1.4       | 0.29              | 0.64           | 0.7          | 0.41              | 1.13         |
| 61-65 years                        | 0.68             | 1.56       | 1.04       | 1.13  | 0.79            | 0.57        | 1.54  | 0             | 1.44         | 2.01      | 0.94              | 0.71           | 1.16         | 1.56              | 1.08         |
| 71-75 years                        | 0.81             | 0.83       | 0.81       | 0.98  | 0.91            | 0.71        | 1.72  | 3.1           | 1.14         | 0.71      | 0.94              | 0.7            | 1.01         | 0.63              | 0.96         |
| 76-80 years                        | 1.06             | 0.83       | 0.76       | 0.83  | 0.62            | 1.02        | 1.59  | 5.48          | 0.83         | 0.71      | 0.86              | 0.9            | 0.71         | 0.79              | 0.81         |
| 81-85 years                        | 1.1              | 0.98       | 1.08       | 0.89  | 1.7             | 0.95        | 2.39  | 5.48          | 1.25         | 0.72      | 0.87              | 1.03           | 0.91         | 0.53              | 0.62         |
| 86+ years                          | 0.97             | 0.72       | 0.86       | 1.25  | 0.83            | 0.96        | 2.11  | 0.05          | 1.29         | 0.49      | 1.14              | 0.66           | 0.94         | 0.53              | 0.46         |
| Alpha Blockers                     | 1.91             | 1.3        | 1.2        | 0.98  | 1.2             | 2.14        | 1.03  | 9.89          | 0.99         | 1.38      | 1.39              | 1.29           | 1.78         | 1.23              | 0.49         |
| Anterior Vitrectomy during Surgery | 4.03             | 2.26       | 0.5        | 1.04  | 5.94            | 1.62        | 11.86 | 26771.87      | 3.22         | 3.41      | 0.47              | 0.59           | 0.26         | 0.84              | 83.72        |
| Any Intraoperative Complication    | 1.42             | 1.3        | 5.83       | 4.29  | 1.84            | 5.18        | 1.4   | 0             | 5.72         | 0.25      | 25.42             | 2.82           | 29.79        | 9.78              | 0.05         |
| ARMD                               | 1.1              | 1.51       | 1.78       | 1.65  | 0.84            | 1.14        | 0.89  | 5.66          | 2.03         | 1.71      | 1.96              | 1.3            | 1.74         | 2.48              | 1.88         |
| Complicated Cataract Surgery       | 2.05             | 1.28       | 1.51       | 1.78  | 3.22            | 1.54        | 1.21  | 0.25          | 1.39         | 1.49      | 1.41              | 1.34           | 1.91         | 2.16              | 3.21         |
| Charlson Score                     | 0.95             | 0.99       | 1.02       | 1.02  | 0.98            | 0.97        | 1.06  | 1.39          | 1.03         | 0.99      | 1.01              | 0.97           | 1.01         | 0.98              | 0.9          |
| Corneal Arcus/Scarring             | 1.74             | 1.33       | 1.45       | 1.74  | 2.19            | 1.23        | 0.98  | 0             | 0.87         | 1         | 2.43              | 1.96           | 2.04         | 2.17              | 0.96         |
| Corneal Edema                      | 0.98             | 0.7        | 0.27       | 0.94  | 1               | 1.17        | 0.45  | 0             | 0.36         | 0.38      | 1.34              | 3.92           | 1.44         | 2.27              | 0.55         |
| Diabetes                           | 1.22             | 1.27       | 1.36       | 1.8   | 1.66            | 1.13        | 0.76  | 0.22          | 0.89         | 1.36      | 1.71              | 1.35           | 2.06         | 1.91              | 2.01         |
| Dropped Lens/Retained Fragment     | 1.64             | 0.97       | 2.18       | 0.67  | 2.25            | 0.44        | 1.41  | 179.23        | 12.17        | 4.1       | 1.77              | 0.41           | 0.18         | 0.57              | 8.47         |
| Eye Trauma                         | 0.92             | 1.23       | 0.77       | 0.79  | 0.11            | 0.83        | 0.94  | 0             | 0            | 1.39      | 0.33              | 1.18           | 0            | 0.43              | 2.05         |
| Fuch's Dystrophy                   | 1.93             | 1.35       | 1.39       | 1.77  | 4.3             | 2.28        | 0.68  | 0             | 0            | 0.19      | 1.24              | 3.51           | 3.22         | 6.63              | 0            |
| Male                               | 0.91             | 1.04       | 1.09       | 1.23  | 0.77            | 0.94        | 1.35  | 0.38          | 1.22         | 0.9       | 1.17              | 1.09           | 1.42         | 1.22              | 0.59         |
| Glaucoma                           | 0                | 1.14       | 0          | 0.83  | 2.12            | 1           | 1.06  | 0.75          | 0.75         | 1.39      | 1.01              | 1              | 1.29         | 0.78              | 0.91         |

|                                               | 1    | 2    | 3    | 4    | 5    | 6    | 7    | 8     | 9    | 10   | 11   | 12   | 13   | 14   | 15   |
|-----------------------------------------------|------|------|------|------|------|------|------|-------|------|------|------|------|------|------|------|
| Hyperopia                                     | 1.27 | 1.05 | 1.78 | 1.62 | 0.98 | 0.94 | 0.77 | 0     | 0.73 | 1.58 | 1.78 | 0.18 | 1.45 | 1.32 | 0.4  |
| IFIS/Iris Damage during Surgery               | 0.44 | 0.81 | 0.24 | 0    | 2.64 | 0.09 | 0.21 | 0     | 0.37 | 3.92 | 0.04 | 0    | 0.02 | 0    | 0    |
| Prior IFIS/Iris Damage                        | 0.47 | 0.83 | 0.79 | 0    | 3.19 | 0    | 7.43 | 0     | 0    | 0.46 | 1.01 | 1    | 1    | 2.5  | 0    |
| Intraocular Surgery                           | 0.86 | 1.23 | 0.29 | 0.76 | 0.4  | 1.06 | 1.5  | 2.32  | 0.27 | 1.45 | 0.58 | 0.73 | 4.6  | 4.96 | 1.26 |
| Intravitreal Injection                        | 1.12 | 0.95 | 0.05 | 1.46 | 0.5  | 1.36 | 0.65 | 5.5   | 2.01 | 1.26 | 0.07 | 1.53 | 1.72 | 0.4  | 1    |
| Lens Subluxation                              | 0.69 | 1.39 | 0    | 0.35 | 3.29 | 1.01 | 3.83 | 1     | 1.88 | 0.85 | 1.73 | 1.32 | 0    | 1.29 | 5.72 |
| Myopia                                        | 1.06 | 1.18 | 1.14 | 1.49 | 0.51 | 1.19 | 0.95 | 1.31  | 0.74 | 1.3  | 1.31 | 0.72 | 1.69 | 0.47 | 0.83 |
| Nystagmus                                     | 0.83 | 1.02 | 0.9  | 0.77 | 0.71 | 1.01 | 1.52 | 7.43  | 0.27 | 0.99 | 0.44 | 1.08 | 0.84 | 0.74 | 0    |
| Posterior Capsule Tear/Rupture during Surgery | 0.7  | 1.6  | 0.45 | 1.05 | 0.48 | 0.92 | 0.63 | 0     | 0.1  | 0.34 | 0.27 | 5.97 | 3.19 | 0.56 | 0    |
| Pseudoexfoliation                             | 1.35 | 1.62 | 1.85 | 1.78 | 1.72 | 1.56 | 1.59 | 0.47  | 1.18 | 3.4  | 1.53 | 0.14 | 1.11 | 2.44 | 0.68 |
| Race/Ethnicity - Asian                        | 0.97 | 0.76 | 0.84 | 0.76 | 0.83 | 0.82 | 1.07 | 0.25  | 1.11 | 1.1  | 1.12 | 0.33 | 1.4  | 1.29 | 0.83 |
| Race/Ethnicity - Black                        | 2.77 | 0.97 | 1.72 | 0.82 | 0.99 | 3.23 | 2.19 | 0     | 3.08 | 1.33 | 1.49 | 0.22 | 1.57 | 2.02 | 1.96 |
| Race/Ethnicity - Hispanic                     | 1.26 | 0.98 | 0.87 | 0.76 | 1.45 | 1.24 | 0.94 | 3.81  | 1.87 | 0.89 | 0.99 | 1.04 | 0.93 | 0.93 | 0.35 |
| Race/Ethnicity - Other/Unknown                | 0.79 | 0.89 | 0.68 | 0.91 | 0.67 | 0.75 | 1.02 | 0.27  | 1.75 | 1.07 | 0.94 | 0.77 | 1.61 | 0.91 | 0.78 |
| Refractive Surgery                            | 1.08 | 7.65 | 4.53 | 2.01 | 1.19 | 0.77 | 1.84 | 12.46 | 2.17 | 1.58 | 2.04 | 1    | 1.12 | 0.96 | 2.16 |
| Retinal Detachment/Repair                     | 1.19 | 1.05 | 0    | 0.85 | 1.65 | 1.02 | 1.35 | 1.1   | 2.37 | 1.1  | 0    | 0.9  | 1    | 1.04 | 1.17 |
| Ophthalmic Steroid Use                        | 1.41 | 0.82 | 1.87 | 1.22 | 1.34 | 1.89 | 0.74 | 0     | 1.05 | 0.71 | 3.44 | 0.31 | 3.15 | 1.06 | 0.62 |
| Prior Cataract Surgery                        | 0.8  | 1.08 | 1    | 0.49 | 0.64 | 0.7  | 0.98 | 0.08  | 0.45 | 1.12 | 0.64 | 1.12 | 0.59 | 0.51 | 0.93 |
| Uveitis                                       | 2.42 | 1.06 | 0.85 | 2.19 | 2.24 | 1.36 | 1.84 | 0     | 1.86 | 1.11 | 1.45 | 0.71 | 0.42 | 2.08 | 6.2  |
| Prior Vitrectomy                              | 2.24 | 1.31 | 1.43 | 2.88 | 2    | 2.38 | 2.46 | 3.19  | 9.01 | 1.19 | 2.97 | 1.05 | 1.4  | 0.72 | 0.2  |

Postoperative Complications

|                                    | 95% CI         |           |            |           |               |            |            |                   |            |            |                 |              |             |                |                        |
|------------------------------------|----------------|-----------|------------|-----------|---------------|------------|------------|-------------------|------------|------------|-----------------|--------------|-------------|----------------|------------------------|
|                                    | anterior_comps | any_lens  | any_post   | cme       | corneal_edema | glauc_any  | iol        | lens_sublux       | pars_plana | pco_yag    | posterior_comps | refract_surg | ret_repair  | vitr_tap_endop | wound_leak             |
| 40-45 years                        | 0.16-2.34      | 2.1-6.33  | 1.16-5.14  | 0.12-3.08 | 0.07-8.21     | 0.24-3.56  | 0.27-8.7   | 0-Inf             | 0.94-15.46 | 2.67-9.73  | 0.5-7.07        | 0.26-3.52    | 0.5-13.86   | 0.02-3.51      | 0-1.12076820597868e+23 |
| 46-50 years                        | 0.34-2.63      | 1.02-2.95 | 0.58-2.36  | 0.18-2.59 | 0-69.85       | 0.31-2.98  | 0.26-7.29  | 0-7.540751e+267   | 0.89-10.31 | 1.16-4.36  | 0.27-3.02       | 0.15-1.86    | 0-0         | 0.34-5.68      | 0.3-10.89              |
| 51-55 years                        | 0.12-1.14      | 0.75-1.86 | 0.6-1.78   | 0.28-2.25 | 0.28-4.12     | 0.1-1.27   | 0.21-3.87  | 0.3-494.08        | 0.41-4.38  | 1.1-3.35   | 0.38-2.4        | 0.34-1.89    | 0.74-6.08   | 0.09-2.48      | 0.03-4.29              |
| 56-60 years                        | 0.29-1.31      | 0.78-1.61 | 0.34-0.96  | 0.27-1.6  | 0.31-2.99     | 0.17-1.09  | 1.15-7.44  | 0.78-429.53       | 0.39-3.46  | 0.87-2.22  | 0.08-0.8        | 0.29-1.28    | 0.19-2.04   | 0.09-1.38      | 0.23-4.53              |
| 61-65 years                        | 0.34-1.29      | 1.15-2.11 | 0.7-1.52   | 0.55-2.27 | 0.25-2.22     | 0.25-1.2   | 0.57-4.12  | 0-1.58779e+92     | 0.52-3.89  | 1.34-2.99  | 0.49-1.74       | 0.38-1.26    | 0.49-2.65   | 0.66-3.6       | 0.26-3.9               |
| 71-75 years                        | 0.5-1.33       | 0.64-1.09 | 0.6-1.1    | 0.55-1.78 | 0.4-2.14      | 0.4-1.24   | 0.78-4.11  | 0.2-101.6         | 0.48-2.79  | 0.49-1.05  | 0.57-1.53       | 0.45-1.1     | 0.51-2.04   | 0.27-1.42      | 0.32-3                 |
| 76-80 years                        | 0.67-1.69      | 0.64-1.08 | 0.57-1.02  | 0.46-1.52 | 0.26-1.51     | 0.61-1.72  | 0.72-3.79  | 0.49-166.36       | 0.33-2.13  | 0.49-1.04  | 0.53-1.39       | 0.6-1.36     | 0.34-1.45   | 0.37-1.7       | 0.26-2.59              |
| 81-85 years                        | 0.66-1.82      | 0.73-1.3  | 0.79-1.47  | 0.46-1.7  | 0.77-3.89     | 0.52-1.7   | 1.06-5.77  | 0.49-159.84       | 0.5-3.22   | 0.47-1.1   | 0.51-1.48       | 0.66-1.62    | 0.41-1.98   | 0.2-1.3        | 0.15-2.32              |
| 86+ years                          | 0.6-1.57       | 0.55-0.95 | 0.64-1.15  | 0.71-2.27 | 0.35-2        | 0.57-1.66  | 0.97-4.98  | 0-3.34            | 0.55-3.17  | 0.32-0.76  | 0.72-1.84       | 0.42-1.01    | 0.46-1.95   | 0.22-1.26      | 0.11-1.71              |
| Alpha Blockers                     | 1.11-3.16      | 0.95-1.75 | 0.8-1.77   | 0.49-1.82 | 0.48-2.73     | 1.16-3.75  | 0.45-2.11  | 1.04-74.81        | 0.35-2.4   | 0.9-2.07   | 0.79-2.34       | 0.72-2.18    | 0.86-3.43   | 0.49-2.73      | 0.03-2.68              |
| Anterior Vitrectomy during Surgery | 0.66-23.59     | 0.75-6.74 | 0.12-2.01  | 0.12-8.67 | 0.96-35.87    | 0.13-16    | 1.75-89.12 | 39.41-92155741.72 | 0.71-16.72 | 0.67-16.33 | 0.11-2.03       | 0.08-3.74    | 0.02-2.29   | 0.06-10.6      | 1.05-4920.27           |
| Any Intraoperative Complication    | 0.23-9.3       | 0.42-4.1  | 1.31-26.47 | 0.47-40   | 0.29-12.09    | 0.49-71.11 | 0.17-10.17 | 0-1.91            | 1.01-28.85 | 0.05-1.28  | 5.5-118.48      | 0.36-23.05   | 3.09-317.89 | 0.69-151.72    | 0-4.92                 |
| ARMD                               | 0.7-1.68       | 1.2-1.89  | 1.32-2.37  | 1.05-2.52 | 0.4-1.62      | 0.68-1.84  | 0.46-1.61  | 1.11-26.05        | 1.13-3.54  | 1.26-2.31  | 1.3-2.88        | 0.85-1.94    | 0.94-3.04   | 1.36-4.36      | 0.7-4.44               |
| Complicated Cataract Surgery       | 1.37-3.02      | 1.02-1.61 | 1.09-2.08  | 1.15-2.71 | 1.86-5.48     | 0.94-2.45  | 0.66-2.11  | 0.01-2.01         | 0.76-2.45  | 1.1-1.99   | 0.91-2.13       | 0.85-2.05    | 1.08-3.23   | 1.19-3.77      | 1.4-6.89               |
| Charlson Score                     | 0.89-1.01      | 0.96-1.03 | 0.98-1.05  | 0.95-1.08 | 0.88-1.07     | 0.9-1.03   | 0.98-1.14  | 1.13-1.68         | 0.94-1.12  | 0.95-1.04  | 0.96-1.07       | 0.91-1.03    | 0.93-1.09   | 0.88-1.07      | 0.71-1.06              |
| Corneal Arcus/Scarring             | 1.01-2.86      | 0.97-1.8  | 0.97-2.12  | 0.96-2.96 | 0.99-4.43     | 0.6-2.29   | 0.38-2.12  | 0-7.69164e+75     | 0.28-2.22  | 0.62-1.55  | 1.5-3.81        | 1.15-3.16    | 0.99-3.86   | 1-4.34         | 0.19-3.33              |
| Corneal Edema                      | 0.2-3.38       | 0.36-1.33 | 0.04-1.16  | 0.27-2.67 | NA            | 0.17-4.78  | 0.02-2.44  | 0-2.1378531e+254  | 0.02-2.25  | 0.09-1.15  | 0.44-3.49       | 1.44-9.5     | 0.29-5.2    | 0.68-6.6       | 0.02-4.38              |
| Diabetes                           | 0.89-1.65      | 1.08-1.5  | 1.12-1.64  | 1.26-2.58 | 0.98-2.8      | 0.79-1.61  | 0.48-1.19  | 0.04-1.08         | 0.53-1.47  | 1.08-1.7   | 1.26-2.31       | 1.02-1.79    | 1.32-3.21   | 1.15-3.17      | 0.99-4.06              |

| Comprehensive Ophthalmology Data Report - Q3 2023 |                      |           |                     |                 |                      |                       |                    |                         |                        |                             |                    |                 |                        |                   |                         |
|---------------------------------------------------|----------------------|-----------|---------------------|-----------------|----------------------|-----------------------|--------------------|-------------------------|------------------------|-----------------------------|--------------------|-----------------|------------------------|-------------------|-------------------------|
| Clinical Category                                 | Patient Demographics |           |                     |                 | Medical History      |                       |                    |                         | Diagnostic Findings    |                             |                    |                 | Treatment & Outcomes   |                   |                         |
|                                                   | Age (yr)             | Sex       | Race/Ethnicity      | Referral Source | Duration of Symptoms | Associated Conditions | Previous Surgeries | Family History          | Visual Acuity (logMAR) | Intraocular Pressure (mmHg) | Slit Lamp Findings | Imaging Results | Medical Management     | Surgical Approach | Post-operative Status   |
| Dropped Lens/Retained Fragment                    | 0.22-8.77            | 0.27-3.15 | 0.45-10.16          | 0.06-5.06       | 0.33-12.42           | 0.02-4.12             | 0.2-7.63           | 2.4-53878.72            | 2.66-62.33             | 0.77-19.59                  | 0.36-8.3           | 0.02-4.08       | 0.01-2.25              | 0.03-6.37         | 0.28-127.42             |
| Eye Trauma                                        | 0.3-2.22             | 0.79-1.87 | 0.32-1.61           | 0.26-1.89       | 0-0.68               | 0.19-2.38             | 0.26-2.56          | 0-5.51068873272986e+211 | 0-385.88               | 0.79-2.33                   | 0.08-0.99          | 0.46-2.55       | 0-0                    | 0.06-1.63         | 0.42-6.87               |
| Fuch's Dystrophy                                  | 0.63-4.79            | 0.71-2.41 | 0.62-2.89           | 0.49-4.83       | 0.92-13.62           | 0.64-6.11             | 0.03-3.73          | 0-Inf                   | 0-133857870.55         | 0.01-0.91                   | 0.38-3.25          | 1.53-7.2        | 0.93-9.01              | 2.13-17.36        | 0-1.00713550831647e+26  |
| Male                                              | 0.68-1.22            | 0.89-1.21 | 0.92-1.3            | 0.87-1.72       | 0.45-1.28            | 0.67-1.3              | 0.91-2.01          | 0.09-1.47               | 0.77-1.92              | 0.72-1.13                   | 0.87-1.55          | 0.85-1.41       | 0.93-2.16              | 0.75-1.96         | 0.28-1.2                |
| Glaucoma                                          | 0-0                  | 0.96-1.35 | 0-0                 | 0.57-1.2        | 1.29-3.46            | NA                    | 0.68-1.63          | 0.13-3.17               | 0.44-1.24              | 1.1-1.74                    | 0.73-1.38          | 0.72-1.36       | 0.82-2                 | 0.46-1.3          | 0.4-1.92                |
| Hyperopia                                         | 0.65-2.29            | 0.75-1.46 | 1.08-2.84           | 0.86-2.86       | 0.38-2.23            | 0.38-1.98             | 0.23-1.92          | 0-1.16670356229143e+131 | 0.21-1.96              | 1.07-2.29                   | 0.99-3.02          | 0.03-0.59       | 0.61-3.04              | 0.54-2.86         | 0.02-2                  |
| IFIS/Iris Damage during Surgery                   | 0.04-3.37            | 0.22-2.73 | 0.03-1.67           | 0-638598402.17  | 0.35-16.47           | 0-1.41                | 0.01-1.95          | 0-Inf                   | 0.04-2.81              | 0.72-18.31                  | 0-0.32             | 0-0             | 0-0.41                 | 0-8.3             | 0-6.02917408819402e+31  |
| Prior IFIS/Iris Damage                            | 0.02-2.64            | 0.27-2.08 | 0.11-3.42           | 0-7024926.07    | 0.44-13.74           | 0-0.1                 | 1.61-24.82         | 0-5.89561984422885e+278 | 0-0                    | 0.07-1.78                   | 0.14-4.12          | 0.05-5.6        | 0.05-5.98              | 0.13-14.55        | 0-4.702603862025e+46    |
| Intraocular Surgery                               | 0.38-1.91            | 0.79-1.91 | 0.08-0.81           | 0.35-1.65       | 0.11-1.39            | 0.44-2.52             | 0.59-3.95          | 0.14-31.8               | 0.12-0.61              | 0.82-2.55                   | 0.17-1.64          | 0.28-1.8        | 1.46-13.24             | 1.66-14.28        | 0.12-8.38               |
| Intravitreal Injection                            | 0.53-2.21            | 0.64-1.4  | 0-0.33              | 0.75-2.71       | 0.15-1.4             | 0.6-2.82              | 0.24-1.55          | 0.55-43.74              | 0.97-4.04              | 0.78-1.98                   | 0-0.46             | 0.7-3.07        | 0.51-4.74              | 0.11-1.12         | 0.14-4.26               |
| Lens Subluxation                                  | 0.1-2.78             | 0.78-2.42 | 0-20335269865502496 | 0.05-1.25       | 0.94-10.43           | 0.15-4.11             | 1.48-9.24          | NA                      | 0.65-4.95              | 0.39-1.74                   | 0.24-7.85          | 0.35-3.96       | 0-2.86457433664752e+30 | 0.34-4.04         | 0.71-30.25              |
| Myopia                                            | 0.66-1.65            | 0.94-1.48 | 0.79-1.62           | 0.92-2.34       | 0.22-1.06            | 0.69-1.97             | 0.5-1.71           | 0.15-8.04               | 0.35-1.47              | 0.97-1.72                   | 0.81-2.05          | 0.41-1.21       | 0.92-2.98              | 0.2-0.96          | 0.27-2.19               |
| Nystagmus                                         | 0.31-1.85            | 0.64-1.58 | 0.48-1.59           | 0.23-1.94       | 0.15-2.31            | 0.34-2.39             | 0.44-3.9           | 0.33-62.9               | 0.03-1.31              | 0.5-1.77                    | 0.1-1.27           | 0.44-2.25       | 0.19-2.56              | 0.12-2.58         | 0-813377042194648832    |
| Posterior Capsule Tear/Rupture during Surgery     | 0.1-4.8              | 0.45-5.67 | 0.11-1.86           | 0.09-8.77       | 0.04-4.22            | 0.07-10.9             | 0.08-4.92          | 0-Inf                   | 0.01-0.52              | 0.04-2.33                   | 0.06-1.16          | 0.86-59.54      | 0.32-35.17             | 0.02-6.52         | 0-2.02496679196793e+126 |
| Pseudoexfoliation                                 | 0.86-2.03            | 1.32-1.99 | 1.41-2.41           | 1.15-2.68       | 0.95-3               | 0.95-2.46             | 0.93-2.62          | 0.02-3.59               | 0.6-2.18               | 2.66-4.32                   | 1.03-2.21          | 0.06-0.3        | 0.62-1.9               | 1.39-4.17         | 0.19-1.84               |
| Race/Ethnicity - Asian                            | 0.62-1.49            | 0.59-0.97 | 0.62-1.12           | 0.44-1.25       | 0.38-1.63            | 0.47-1.36             | 0.56-1.93          | 0.01-2.17               | 0.52-2.19              | 0.8-1.48                    | 0.73-1.68          | 0.17-0.58       | 0.78-2.44              | 0.66-2.38         | 0.26-2.17               |
| Race/Ethnicity - Black                            | 1.48-4.88            | 0.62-1.47 | 1.07-2.68           | 0.28-1.91       | 0.28-2.72            | 1.64-5.91             | 0.85-4.86          | 0-2.61553478173696e+128 | 1.1-7.38               | 0.77-2.18                   | 0.71-2.85          | 0.04-0.7        | 0.52-3.86              | 0.66-5.03         | 0.43-6.3                |
| Race/Ethnicity - Hispanic                         | 0.61-2.37            | 0.67-1.41 | 0.51-1.42           | 0.3-1.63        | 0.51-3.44            | 0.53-2.53             | 0.27-2.44          | 0.16-33.66              | 0.7-4.41               | 0.52-1.46                   | 0.42-2             | 0.53-1.87       | 0.26-2.47              | 0.26-2.48         | 0.02-2                  |
| Race/Ethnicity - Other                            | 0.5-1.2              | 0.71-1.11 | 0.52-0.88           | 0.56-1.44       | 0.29-1.36            | 0.44-1.21             | 0.57-1.74          | 0.01-2.01               | 0.95-3.11              | 0.78-1.44                   | 0.61-1.41          | 0.52-1.1        | 0.92-2.71              | 0.43-1.77         | 0.22-2.08               |

Other/Unknown

|                           |           |           |           |           |           |           |           |                         |            |           |           |           |           |           |           |
|---------------------------|-----------|-----------|-----------|-----------|-----------|-----------|-----------|-------------------------|------------|-----------|-----------|-----------|-----------|-----------|-----------|
| Refractive Surgery        | 0.56-1.92 | 6.09-9.6  | 3.32-6.15 | 1.11-3.44 | 0.39-2.88 | 0.31-1.6  | 0.86-3.58 | 1.32-87.75              | 0.92-4.61  | 1.02-2.35 | 1.17-3.38 | NA        | 0.4-2.57  | 0.31-2.4  | 0.6-5.93  |
| Retinal Detachment/Repair | 0.75-1.87 | 0.82-1.34 | 0-0       | 0.51-1.4  | 0.84-3.15 | 0.59-1.74 | 0.7-2.52  | 0.14-6.79               | 1.24-4.45  | 0.8-1.52  | 0-0       | 0.53-1.49 | NA        | 0.51-2.02 | 0.38-3.18 |
| Ophthalmic Steroid Use    | 0.83-2.35 | 0.6-1.1   | 1.12-3.04 | 0.68-2.13 | 0.62-2.75 | 1.02-3.4  | 0.3-1.62  | 0-8.25018389416857e+102 | 0.48-2.17  | 0.47-1.05 | 1.98-5.75 | 0.11-0.69 | 1.52-6.13 | 0.44-2.33 | 0.13-2.11 |
| Prior Cataract Surgery    | 0.6-1.07  | 0.92-1.27 | 0.83-1.2  | 0.36-0.69 | 0.4-1.04  | 0.51-0.96 | 0.66-1.47 | 0.01-0.35               | 0.29-0.7   | 0.89-1.41 | 0.48-0.85 | 0.86-1.47 | 0.39-0.9  | 0.32-0.81 | 0.48-1.91 |
| Uveitis                   | 1.14-4.7  | 0.71-1.56 | 0.39-1.67 | 1.1-4.08  | 0.86-5.2  | 0.48-3.22 | 0.75-4    | 0-1.15493205891522e+109 | 0.79-4.04  | 0.67-1.76 | 0.69-2.82 | 0.28-1.57 | 0.06-1.55 | 0.79-4.81 | 2.2-15.23 |
| Prior Vitrectomy          | 1.12-4.21 | 0.87-1.93 | 0.76-2.56 | 1.45-5.36 | 0.68-5.03 | 1.08-4.86 | 0.99-5.53 | 0.18-41.7               | 4.44-17.57 | 0.69-1.99 | 1.42-5.74 | 0.46-2.19 | 0.44-3.93 | 0.22-2.12 | 0.02-1.43 |
