# Supplementary material
Source: PubMed Central journal article supplement (PMC4930873)
Supplement: NIHMS796796-supplement-Table_S5.pdf [file NIHMS796796-supplement-Table_S5.pdf]

**Table S5 - Outcomes of multivariate logistic regressions on risk factors selected by bootstrapped LASSO model**

Intraoperative Complications  
Anterior Vitrectomy

| risk                           | OR   | Lower Bound<br>95% CI | Upper Bound<br>95% CI | P-value  |
|--------------------------------|------|-----------------------|-----------------------|----------|
| 40-45 years                    | 0    | 0                     | 0                     | 0.975058 |
| 46-50 years                    | 1.07 | 0.17                  | 3.87                  | 0.928263 |
| 51-55 years                    | 1.95 | 0.68                  | 4.87                  | 0.173273 |
| 56-60 years                    | 0.91 | 0.32                  | 2.23                  | 0.84512  |
| 61-65 years                    | 1    | 0.42                  | 2.23                  | 0.995843 |
| 71-75 years                    | 0.69 | 0.35                  | 1.37                  | 0.2827   |
| 76-80 years                    | 0.77 | 0.41                  | 1.49                  | 0.429439 |
| 81-85 years                    | 1.15 | 0.59                  | 2.26                  | 0.686479 |
| 86+ years                      | 1.1  | 0.6                   | 2.09                  | 0.759729 |
| Alpha Blockers                 | 1.5  | 0.7                   | 2.92                  | 0.267182 |
| ARMD                           | 1.3  | 0.72                  | 2.23                  | 0.355305 |
| Charlson Score                 | 1    | 0.91                  | 1.07                  | 0.903246 |
| Corneal Arcus/Scarring         | 1.34 | 0.58                  | 2.69                  | 0.448705 |
| Corneal Edema                  | 1.16 | 0.17                  | 4.73                  | 0.852215 |
| Diabetes                       | 1.28 | 0.85                  | 1.9                   | 0.232182 |
| Eye Trauma                     | 2.2  | 0.82                  | 4.89                  | 0.077911 |
| Fuch's Dystrophy               | 0.73 | 0.04                  | 3.65                  | 0.761906 |
| Male                           | 1.05 | 0.72                  | 1.51                  | 0.803485 |
| Glaucoma                       | 1.27 | 0.84                  | 1.9                   | 0.247337 |
| Hyperopia                      | 0.49 | 0.12                  | 1.35                  | 0.234969 |
| Prior IFIS/Iris Damage         | 0    | 0                     | 550.82                | 0.982778 |
| Intraocular Surgery            | 1.06 | 0.29                  | 3.49                  | 0.927687 |
| Intravitreal Injection         | 1.23 | 0.4                   | 3.16                  | 0.687559 |
| Lens Subluxation               | 2.13 | 0.45                  | 7.54                  | 0.281269 |
| Myopia                         | 0.79 | 0.38                  | 1.5                   | 0.501236 |
| Nystagmus                      | 0.74 | 0.12                  | 2.4                   | 0.677985 |
| Pseudoexfoliation              | 1.81 | 1.12                  | 2.85                  | 0.012415 |
| Race/Ethnicity - Asian         | 1.26 | 0.71                  | 2.12                  | 0.405796 |
| Race/Ethnicity - Black         | 1.53 | 0.58                  | 3.38                  | 0.334508 |
| Race/Ethnicity - Hispanic      | 0.61 | 0.15                  | 1.69                  | 0.411217 |
| Race/Ethnicity - Other/Unknown | 1.24 | 0.74                  | 1.98                  | 0.390471 |
| Refractive Surgery             | 0.89 | 0.31                  | 2.04                  | 0.808151 |
| Retinal Detachment/Repair      | 0.68 | 0.32                  | 1.36                  | 0.305042 |
| Ophthalmic Steroid Use         | 0.26 | 0.04                  | 0.86                  | 0.065012 |
| Prior Cataract Surgery         | 0.56 | 0.39                  | 0.8                   | 0.001549 |
| Uveitis                        | 0.64 | 0.15                  | 1.81                  | 0.460987 |

|                  |      |      |      |          |
|------------------|------|------|------|----------|
| Prior Vitrectomy | 0.91 | 0.28 | 2.44 | 0.860018 |
|------------------|------|------|------|----------|

Any Intraoperative Complication

| risk                           | OR   | Lower Bound<br>95% CI | Upper Bound<br>95% CI | P-value  |
|--------------------------------|------|-----------------------|-----------------------|----------|
| 40-45 years                    | 0.77 | 0.12                  | 2.74                  | 0.732982 |
| 46-50 years                    | 0.81 | 0.19                  | 2.37                  | 0.733851 |
| 51-55 years                    | 2.26 | 1.09                  | 4.44                  | 0.021979 |
| 56-60 years                    | 0.9  | 0.42                  | 1.78                  | 0.764476 |
| 61-65 years                    | 1.01 | 0.54                  | 1.84                  | 0.971218 |
| 71-75 years                    | 0.68 | 0.4                   | 1.16                  | 0.15488  |
| 76-80 years                    | 0.77 | 0.47                  | 1.28                  | 0.31585  |
| 81-85 years                    | 0.96 | 0.56                  | 1.66                  | 0.887606 |
| 86+ years                      | 1.08 | 0.66                  | 1.78                  | 0.765467 |
| Alpha Blockers                 | 2.36 | 1.47                  | 3.68                  | 0.000227 |
| ARMD                           | 1.23 | 0.8                   | 1.86                  | 0.332059 |
| Charlson Score                 | 1.03 | 0.97                  | 1.08                  | 0.290744 |
| Corneal Arcus/Scarring         | 1.05 | 0.55                  | 1.84                  | 0.882276 |
| Corneal Edema                  | 0.5  | 0.08                  | 1.79                  | 0.3601   |
| Diabetes                       | 1.22 | 0.89                  | 1.66                  | 0.217276 |
| Eye Trauma                     | 1.52 | 0.69                  | 2.98                  | 0.252891 |
| Fuch's Dystrophy               | 1.47 | 0.35                  | 4.15                  | 0.532295 |
| Male                           | 1.29 | 0.96                  | 1.73                  | 0.087563 |
| Glaucoma                       | 1.36 | 0.99                  | 1.86                  | 0.051228 |
| Hyperopia                      | 0.71 | 0.33                  | 1.37                  | 0.344917 |
| Prior IFIS/Iris Damage         | 0    | 0                     | 49.54                 | 0.971252 |
| Intraocular Surgery            | 0.91 | 0.4                   | 2.03                  | 0.814574 |
| Intravitreal Injection         | 1.04 | 0.5                   | 1.99                  | 0.919515 |
| Lens Subluxation               | 2.41 | 1.01                  | 5.36                  | 0.03745  |
| Myopia                         | 0.88 | 0.55                  | 1.37                  | 0.592162 |
| Nystagmus                      | 1.18 | 0.49                  | 2.43                  | 0.682176 |
| Pseudoexfoliation              | 1.34 | 0.9                   | 1.97                  | 0.138416 |
| Race/Ethnicity - Asian         | 1.06 | 0.68                  | 1.62                  | 0.776951 |
| Race/Ethnicity - Black         | 1.15 | 0.5                   | 2.31                  | 0.710324 |
| Race/Ethnicity - Hispanic      | 0.9  | 0.41                  | 1.74                  | 0.764332 |
| Race/Ethnicity - Other/Unknown | 1.27 | 0.86                  | 1.83                  | 0.218661 |
| Refractive Surgery             | 0.96 | 0.46                  | 1.78                  | 0.905322 |
| Retinal Detachment/Repair      | 1    | 0.62                  | 1.58                  | 0.993232 |
| Ophthalmic Steroid Use         | 1.47 | 0.87                  | 2.41                  | 0.14028  |
| Prior Cataract Surgery         | 0.54 | 0.41                  | 0.71                  | 1.43E-05 |
| Uveitis                        | 1.1  | 0.51                  | 2.12                  | 0.797849 |
| Prior Vitrectomy               | 1.46 | 0.69                  | 2.87                  | 0.295098 |

Complicated Cataract Surgery

| risk                           | OR   | Lower Bound<br>95% CI | Upper Bound<br>95% CI | P-value  |
|--------------------------------|------|-----------------------|-----------------------|----------|
| 40-45 years                    | 1    | 1                     | 1                     | 1        |
| 46-50 years                    | 1    | 1                     | 1                     | 1        |
| 51-55 years                    | 1    | 1                     | 1                     | 1        |
| 56-60 years                    | 1    | 1                     | 1                     | 1        |
| 61-65 years                    | 1    | 1                     | 1                     | 1        |
| 71-75 years                    | 1    | 1                     | 1                     | 1        |
| 76-80 years                    | 1    | 1                     | 1                     | 1        |
| 81-85 years                    | 1    | 1                     | 1                     | 1        |
| 86+ years                      | 1    | 1                     | 1                     | 1        |
| Alpha Blockers                 | 2.3  | 1.79                  | 2.95                  | 5.04E-11 |
| ARMD                           | 1.61 | 1.3                   | 1.98                  | 8.73E-06 |
| Charlson Score                 | 1    | 1                     | 1                     | 1        |
| Corneal Arcus/Scarring         | 1    | 1                     | 1                     | 1        |
| Corneal Edema                  | 1    | 1                     | 1                     | 1        |
| Diabetes                       | 2.35 | 2                     | 2.77                  | 1.29E-24 |
| Eye Trauma                     | 1    | 1                     | 1                     | 1        |
| Fuch's Dystrophy               | 1    | 1                     | 1                     | 1        |
| Male                           | 1    | 1                     | 1                     | 1        |
| Glaucoma                       | 1    | 1                     | 1                     | 1        |
| Hyperopia                      | 1.82 | 1.38                  | 2.4                   | 2.29E-05 |
| Prior IFIS/Iris Damage         | 1    | 1                     | 1                     | 1        |
| Intraocular Surgery            | 1    | 1                     | 1                     | 1        |
| Intravitreal Injection         | 1    | 1                     | 1                     | 1        |
| Lens Subluxation               | 1    | 1                     | 1                     | 1        |
| Myopia                         | 1    | 1                     | 1                     | 1        |
| Nystagmus                      | 1    | 1                     | 1                     | 1        |
| Pseudoexfoliation              | 1    | 1                     | 1                     | 1        |
| Race/Ethnicity - Asian         | 1    | 1                     | 1                     | 1        |
| Race/Ethnicity - Black         | 1    | 1                     | 1                     | 1        |
| Race/Ethnicity - Hispanic      | 1    | 1                     | 1                     | 1        |
| Race/Ethnicity - Other/Unknown | 1    | 1                     | 1                     | 1        |
| Refractive Surgery             | 1    | 1                     | 1                     | 1        |
| Retinal Detachment/Repair      | 2.22 | 1.82                  | 2.69                  | 2.06E-15 |
| Ophthalmic Steroid Use         | 2.26 | 1.79                  | 2.85                  | 5.06E-12 |
| Prior Cataract Surgery         | 1    | 1                     | 1                     | 1        |
| Uveitis                        | 1    | 1                     | 1                     | 1        |
| Prior Vitrectomy               | 1    | 1                     | 1                     | 1        |

x

Dropped Lens/Retained Fragment

| risk | OR | Lower Bound | Upper Bound | P-value |
|------|----|-------------|-------------|---------|
|------|----|-------------|-------------|---------|

|                                | 95% CI | 95% CI |          |          |
|--------------------------------|--------|--------|----------|----------|
| 40-45 years                    | 1.47   | 0.2    | 6.34     | 0.647407 |
| 46-50 years                    | 1.18   | 0.18   | 4.6      | 0.832002 |
| 51-55 years                    | 3.11   | 1.14   | 8.1      | 0.021114 |
| 56-60 years                    | 1.02   | 0.32   | 2.89     | 0.964635 |
| 61-65 years                    | 1.03   | 0.37   | 2.68     | 0.947217 |
| 71-75 years                    | 0.41   | 0.14   | 1.08     | 0.079139 |
| 76-80 years                    | 0.89   | 0.4    | 2.04     | 0.779029 |
| 81-85 years                    | 0.76   | 0.27   | 1.97     | 0.573007 |
| 86+ years                      | 1.02   | 0.45   | 2.36     | 0.968625 |
| Alpha Blockers                 | 0.42   | 0.07   | 1.44     | 0.240817 |
| ARMD                           | 0.98   | 0.43   | 2.01     | 0.968306 |
| Charlson Score                 | 1.03   | 0.93   | 1.13     | 0.505102 |
| Corneal Arcus/Scarring         | 1.18   | 0.34   | 3.04     | 0.763705 |
| Corneal Edema                  | 0.89   | 0.05   | 4.95     | 0.913844 |
| Diabetes                       | 1.39   | 0.82   | 2.33     | 0.218197 |
| Eye Trauma                     | 0.71   | 0.11   | 2.56     | 0.656059 |
| Fuch's Dystrophy               | 0      | 0      | 17657.51 | 0.983074 |
| Male                           | 1.08   | 0.67   | 1.74     | 0.736835 |
| Glaucoma                       | 1.06   | 0.61   | 1.78     | 0.841748 |
| Hyperopia                      | 0.24   | 0.01   | 1.12     | 0.158114 |
| Prior IFIS/Iris Damage         | 0      | 0      | 4.33E+09 | 0.989288 |
| Intraocular Surgery            | 0.68   | 0.25   | 1.92     | 0.465913 |
| Intravitreal Injection         | 0.91   | 0.3    | 2.39     | 0.85664  |
| Lens Subluxation               | 1.51   | 0.39   | 4.67     | 0.506963 |
| Myopia                         | 0.74   | 0.31   | 1.58     | 0.465054 |
| Nystagmus                      | 1.99   | 0.57   | 5.26     | 0.212409 |
| Pseudoexfoliation              | 1.49   | 0.74   | 2.76     | 0.22698  |
| Race/Ethnicity - Asian         | 0.96   | 0.41   | 1.98     | 0.911068 |
| Race/Ethnicity - Black         | 1.67   | 0.48   | 4.4      | 0.351478 |
| Race/Ethnicity - Hispanic      | 1.72   | 0.66   | 3.94     | 0.227097 |
| Race/Ethnicity - Other/Unknown | 1.19   | 0.59   | 2.22     | 0.607768 |
| Refractive Surgery             | 0.9    | 0.26   | 2.35     | 0.851051 |
| Retinal Detachment/Repair      | 1.21   | 0.54   | 2.57     | 0.623834 |
| Ophthalmic Steroid Use         | 1.15   | 0.43   | 2.67     | 0.76605  |
| Prior Cataract Surgery         | 0.61   | 0.38   | 0.97     | 0.036551 |
| Uveitis                        | 1.09   | 0.34   | 2.82     | 0.874386 |
| Prior Vitrectomy               | 4.32   | 1.75   | 9.54     | 0.000664 |

x

IFIS/Iris Damage

| risk        | OR | Lower Bound<br>95% CI | Upper Bound<br>95% CI | P-value  |
|-------------|----|-----------------------|-----------------------|----------|
| 40-45 years | 0  | 0                     | 5.53E+41              | 0.995398 |

|                                |      |      |          |          |
|--------------------------------|------|------|----------|----------|
| 46-50 years                    | 0    | 0    | 1.29E+37 | 0.994612 |
| 51-55 years                    | 1.89 | 0.24 | 9.67     | 0.479443 |
| 56-60 years                    | 0    | 0    | 2.04E+18 | 0.990108 |
| 61-65 years                    | 0.87 | 0.2  | 3.35     | 0.841289 |
| 71-75 years                    | 1.37 | 0.46 | 4.34     | 0.578187 |
| 76-80 years                    | 0.81 | 0.27 | 2.61     | 0.718368 |
| 81-85 years                    | 1.2  | 0.34 | 4.19     | 0.769689 |
| 86+ years                      | 1.74 | 0.56 | 5.76     | 0.343811 |
| Alpha Blockers                 | 5.27 | 2.52 | 11.04    | 9.12E-06 |
| ARMD                           | 1.02 | 0.42 | 2.29     | 0.966362 |
| Charlson Score                 | 1.09 | 0.99 | 1.18     | 0.060333 |
| Corneal Arcus/Scarring         | 0.36 | 0.08 | 1.18     | 0.134606 |
| Corneal Edema                  | 1.07 | 0.05 | 7.18     | 0.950449 |
| Diabetes                       | 1.74 | 0.86 | 3.57     | 0.127863 |
| Eye Trauma                     | 2.89 | 0.76 | 8.54     | 0.078708 |
| Fuch's Dystrophy               | 1.4  | 0.07 | 9.05     | 0.773749 |
| Male                           | 3.92 | 1.75 | 9.7      | 0.001541 |
| Glaucoma                       | 1.64 | 0.82 | 3.18     | 0.150864 |
| Hyperopia                      | 1.7  | 0.56 | 4.42     | 0.308831 |
| Prior IFIS/Iris Damage         | 1    | 1    | 1        | 1        |
| Intraocular Surgery            | 1.18 | 0.22 | 6.46     | 0.844034 |
| Intravitreal Injection         | 0.63 | 0.14 | 2.24     | 0.499707 |
| Lens Subluxation               | 2.06 | 0.42 | 9.06     | 0.348087 |
| Myopia                         | 0.78 | 0.32 | 1.76     | 0.565095 |
| Nystagmus                      | 2.27 | 0.5  | 7.23     | 0.214897 |
| Pseudoexfoliation              | 0.7  | 0.24 | 1.73     | 0.477632 |
| Race/Ethnicity - Asian         | 0.92 | 0.35 | 2.18     | 0.855351 |
| Race/Ethnicity - Black         | 0    | 0    | 1.79E+18 | 0.991485 |
| Race/Ethnicity - Hispanic      | 0.73 | 0.11 | 2.95     | 0.700722 |
| Race/Ethnicity - Other/Unknown | 1.72 | 0.74 | 3.71     | 0.181422 |
| Refractive Surgery             | 0.79 | 0.12 | 2.85     | 0.753406 |
| Retinal Detachment/Repair      | 2.07 | 0.89 | 4.72     | 0.087064 |
| Ophthalmic Steroid Use         | 4.52 | 2    | 10.06    | 0.000241 |
| Prior Cataract Surgery         | 0.7  | 0.37 | 1.36     | 0.287064 |
| Uveitis                        | 1.94 | 0.4  | 6.7      | 0.344635 |
| Prior Vitrectomy               | 1.15 | 0.22 | 4.78     | 0.863329 |

x

Posterior Capsule Tear/Rupture

| risk        | OR   | Lower Bound<br>95% CI | Upper Bound<br>95% CI | P-value  |
|-------------|------|-----------------------|-----------------------|----------|
| 40-45 years | 0    | 0                     | 1.06E+46              | 0.995341 |
| 46-50 years | 1.59 | 0.08                  | 9.91                  | 0.676362 |
| 51-55 years | 4.39 | 1.05                  | 16.58                 | 0.030342 |

|                                |      |      |          |          |
|--------------------------------|------|------|----------|----------|
| 56-60 years                    | 0    | 0    | 2.76E+19 | 0.990097 |
| 61-65 years                    | 0.24 | 0.01 | 1.49     | 0.195727 |
| 71-75 years                    | 0.34 | 0.07 | 1.31     | 0.129483 |
| 76-80 years                    | 1.11 | 0.4  | 3.37     | 0.848656 |
| 81-85 years                    | 0.62 | 0.13 | 2.45     | 0.512257 |
| 86+ years                      | 0.98 | 0.31 | 3.17     | 0.967027 |
| Alpha Blockers                 | 0.62 | 0.03 | 3.39     | 0.65835  |
| ARMD                           | 0.65 | 0.14 | 2.03     | 0.514565 |
| Charlson Score                 | 1.04 | 0.88 | 1.17     | 0.624983 |
| Corneal Arcus/Scarring         | 0    | 0    | 4.45E+19 | 0.990235 |
| Corneal Edema                  | 6.32 | 0.77 | 32.58    | 0.045658 |
| Diabetes                       | 2.78 | 1.32 | 5.85     | 0.0065   |
| Eye Trauma                     | 1.37 | 0.07 | 7.73     | 0.778902 |
| Fuch's Dystrophy               | 0    | 0    | 6.51E+41 | 0.994703 |
| Male                           | 0.54 | 0.24 | 1.14     | 0.121307 |
| Glaucoma                       | 0.9  | 0.37 | 1.99     | 0.800868 |
| Hyperopia                      | 0.56 | 0.03 | 2.87     | 0.57723  |
| Prior IFIS/Iris Damage         | 0    | 0    | 3.12E+71 | 0.996937 |
| Intraocular Surgery            | 1.32 | 0.2  | 8.61     | 0.768996 |
| Intravitreal Injection         | 0.41 | 0.02 | 3.14     | 0.464437 |
| Lens Subluxation               | 1.58 | 0.07 | 12.18    | 0.699899 |
| Myopia                         | 0.18 | 0.01 | 0.94     | 0.10275  |
| Nystagmus                      | 3.27 | 0.51 | 11.8     | 0.120694 |
| Pseudoexfoliation              | 2.22 | 0.88 | 5.02     | 0.069249 |
| Race/Ethnicity - Asian         | 0.89 | 0.2  | 2.78     | 0.857806 |
| Race/Ethnicity - Black         | 2.16 | 0.33 | 8.09     | 0.323148 |
| Race/Ethnicity - Hispanic      | 1.83 | 0.39 | 6.18     | 0.376387 |
| Race/Ethnicity - Other/Unknown | 2.68 | 1.15 | 5.95     | 0.017493 |
| Refractive Surgery             | 1.1  | 0.15 | 4.34     | 0.910652 |
| Retinal Detachment/Repair      | 0.95 | 0.21 | 3.25     | 0.936898 |
| Ophthalmic Steroid Use         | 0.47 | 0.02 | 2.73     | 0.493128 |
| Prior Cataract Surgery         | 1.16 | 0.57 | 2.51     | 0.68348  |
| Uveitis                        | 0.79 | 0.04 | 4.47     | 0.830001 |
| Prior Vitrectomy               | 2.25 | 0.43 | 8.19     | 0.274404 |

### Post-operative Complications

#### Any Anterior Complication

| risk        | OR   | Lower Bound<br>95% CI | Upper Bound<br>95% CI | P-value  |
|-------------|------|-----------------------|-----------------------|----------|
| 40-45 years | 0.72 | 0.16                  | 2.34                  | 0.625734 |
| 46-50 years | 1.04 | 0.34                  | 2.63                  | 0.937908 |
| 51-55 years | 0.42 | 0.12                  | 1.14                  | 0.126534 |
| 56-60 years | 0.64 | 0.29                  | 1.31                  | 0.244635 |

|                                               |      |      |       |          |
|-----------------------------------------------|------|------|-------|----------|
| 61-65 years                                   | 0.68 | 0.34 | 1.29  | 0.252451 |
| 71-75 years                                   | 0.81 | 0.5  | 1.33  | 0.409872 |
| 76-80 years                                   | 1.06 | 0.67 | 1.69  | 0.806939 |
| 81-85 years                                   | 1.1  | 0.66 | 1.82  | 0.719664 |
| 86+ years                                     | 0.97 | 0.6  | 1.57  | 0.884821 |
| Alpha Blockers                                | 1.91 | 1.11 | 3.16  | 0.015165 |
| Anterior Vitrectomy during Surgery            | 4.03 | 0.66 | 23.59 | 0.123448 |
| Any Intraoperative Complication               | 1.42 | 0.23 | 9.3   | 0.708733 |
| ARMD                                          | 1.1  | 0.7  | 1.68  | 0.661741 |
| Complicated Cataract Surgery                  | 2.05 | 1.37 | 3.02  | 0.000333 |
| Charlson Score                                | 0.95 | 0.89 | 1.01  | 0.146912 |
| Corneal Arcus/Scarring                        | 1.74 | 1.01 | 2.86  | 0.035168 |
| Corneal Edema                                 | 0.98 | 0.2  | 3.38  | 0.97308  |
| Diabetes                                      | 1.22 | 0.89 | 1.65  | 0.210329 |
| Dropped Lens/Retained Fragment                | 1.64 | 0.22 | 8.77  | 0.592123 |
| Eye Trauma                                    | 0.92 | 0.3  | 2.22  | 0.868629 |
| Fuch's Dystrophy                              | 1.93 | 0.63 | 4.79  | 0.195062 |
| Male                                          | 0.91 | 0.68 | 1.22  | 0.529374 |
| Glaucoma                                      | 0    | 0    | 0     | 0.962419 |
| Hyperopia                                     | 1.27 | 0.65 | 2.29  | 0.462137 |
| IFIS/Iris Damage during Surgery               | 0.44 | 0.04 | 3.37  | 0.45747  |
| Prior IFIS/Iris Damage                        | 0.47 | 0.02 | 2.64  | 0.487224 |
| Intraocular Surgery                           | 0.86 | 0.38 | 1.91  | 0.716734 |
| Intravitreal Injection                        | 1.12 | 0.53 | 2.21  | 0.752905 |
| Lens Subluxation                              | 0.69 | 0.1  | 2.78  | 0.648615 |
| Myopia                                        | 1.06 | 0.66 | 1.65  | 0.810492 |
| Nystagmus                                     | 0.83 | 0.31 | 1.85  | 0.682375 |
| Posterior Capsule Tear/Rupture during Surgery | 0.7  | 0.1  | 4.8   | 0.711602 |
| Pseudoexfoliation                             | 1.35 | 0.86 | 2.03  | 0.170046 |
| Race/Ethnicity - Asian                        | 0.97 | 0.62 | 1.49  | 0.900674 |
| Race/Ethnicity - Black                        | 2.77 | 1.48 | 4.88  | 0.000765 |
| Race/Ethnicity - Hispanic                     | 1.26 | 0.61 | 2.37  | 0.498727 |
| Race/Ethnicity - Other/Unknown                | 0.79 | 0.5  | 1.2   | 0.290956 |
| Refractive Surgery                            | 1.08 | 0.56 | 1.92  | 0.799006 |
| Retinal Detachment/Repair                     | 1.19 | 0.75 | 1.87  | 0.453892 |
| Ophthalmic Steroid Use                        | 1.41 | 0.83 | 2.35  | 0.194732 |
| Prior Cataract Surgery                        | 0.8  | 0.6  | 1.07  | 0.126673 |
| Uveitis                                       | 2.42 | 1.14 | 4.7   | 0.014104 |
| Prior Vitrectomy                              | 2.24 | 1.12 | 4.21  | 0.017263 |

Any Lens-Related Complication risk

OR            Lower Bound            Upper Bound            P-value

|                                               | 95% CI | 95% CI |       |          |
|-----------------------------------------------|--------|--------|-------|----------|
| 40-45 years                                   | 4.06   | 2.35   | 6.81  | 2.15E-07 |
| 46-50 years                                   | 1.83   | 1.06   | 3.02  | 0.023576 |
| 51-55 years                                   | 1.32   | 0.84   | 2.03  | 0.212567 |
| 56-60 years                                   | 1.2    | 0.84   | 1.7   | 0.313427 |
| 61-65 years                                   | 1.63   | 1.21   | 2.2   | 0.001419 |
| 71-75 years                                   | 0.82   | 0.63   | 1.07  | 0.150114 |
| 76-80 years                                   | 0.83   | 0.64   | 1.07  | 0.148699 |
| 81-85 years                                   | 0.97   | 0.73   | 1.29  | 0.830726 |
| 86+ years                                     | 0.71   | 0.54   | 0.93  | 0.013528 |
| Alpha Blockers                                | 1      | 1      | 1     | 1        |
| Anterior Vitrectomy during Surgery            | 3.25   | 2.12   | 4.87  | 2.81E-08 |
| Any Intraoperative Complication               | 1      | 1      | 1     | 1        |
| ARMD                                          | 1.69   | 1.36   | 2.09  | 1.58E-06 |
| Complicated Cataract Surgery                  | 1      | 1      | 1     | 1        |
| Charlson Score                                | 1      | 1      | 1     | 1        |
| Corneal Arcus/Scarring                        | 1      | 1      | 1     | 1        |
| Corneal Edema                                 | 1      | 1      | 1     | 1        |
| Diabetes                                      | 1.39   | 1.19   | 1.61  | 1.98E-05 |
| Dropped Lens/Retained Fragment                | 1      | 1      | 1     | 1        |
| Eye Trauma                                    | 1      | 1      | 1     | 1        |
| Fuch's Dystrophy                              | 1      | 1      | 1     | 1        |
| Male                                          | 1      | 1      | 1     | 1        |
| Glaucoma                                      | 1      | 1      | 1     | 1        |
| Hyperopia                                     | 1      | 1      | 1     | 1        |
| IFIS/Iris Damage during Surgery               | 1      | 1      | 1     | 1        |
| Prior IFIS/Iris Damage                        | 1      | 1      | 1     | 1        |
| Intraocular Surgery                           | 1      | 1      | 1     | 1        |
| Intravitreal Injection                        | 1      | 1      | 1     | 1        |
| Lens Subluxation                              | 1      | 1      | 1     | 1        |
| Myopia                                        | 1      | 1      | 1     | 1        |
| Nystagmus                                     | 1      | 1      | 1     | 1        |
| Posterior Capsule Tear/Rupture during Surgery | 1      | 1      | 1     | 1        |
| Pseudoexfoliation                             | 1.69   | 1.39   | 2.06  | 1.53E-07 |
| Race/Ethnicity - Asian                        | 1      | 1      | 1     | 1        |
| Race/Ethnicity - Black                        | 1      | 1      | 1     | 1        |
| Race/Ethnicity - Hispanic                     | 1      | 1      | 1     | 1        |
| Race/Ethnicity - Other/Unknown                | 1      | 1      | 1     | 1        |
| Refractive Surgery                            | 8.23   | 6.6    | 10.25 | 7.31E-79 |
| Retinal Detachment/Repair                     | 1      | 1      | 1     | 1        |
| Ophthalmic Steroid Use                        | 1      | 1      | 1     | 1        |
| Prior Cataract Surgery                        | 1      | 1      | 1     | 1        |



|                  |   |   |   |   |
|------------------|---|---|---|---|
| Uveitis          | 1 | 1 | 1 | 1 |
| Prior Vitrectomy | 1 | 1 | 1 | 1 |

Any Post-Operative Complication

| risk                                          | OR   | Lower Bound<br>95% CI | Upper Bound<br>95% CI | P-value  |
|-----------------------------------------------|------|-----------------------|-----------------------|----------|
| 40-45 years                                   | 2.58 | 1.19                  | 5.22                  | 0.011169 |
| 46-50 years                                   | 1.17 | 0.55                  | 2.26                  | 0.66457  |
| 51-55 years                                   | 1.08 | 0.62                  | 1.81                  | 0.76512  |
| 56-60 years                                   | 0.6  | 0.35                  | 0.98                  | 0.047264 |
| 61-65 years                                   | 1.03 | 0.7                   | 1.5                   | 0.888519 |
| 71-75 years                                   | 0.78 | 0.58                  | 1.05                  | 0.103402 |
| 76-80 years                                   | 0.76 | 0.57                  | 1.02                  | 0.062988 |
| 81-85 years                                   | 1.08 | 0.79                  | 1.47                  | 0.629882 |
| 86+ years                                     | 0.86 | 0.64                  | 1.14                  | 0.283349 |
| Alpha Blockers                                | 1    | 1                     | 1                     | 1        |
| Anterior Vitrectomy during Surgery            | 1    | 1                     | 1                     | 1        |
| Any Intraoperative Complication               | 3.62 | 2.38                  | 5.43                  | 7.87E-10 |
| ARMD                                          | 1.84 | 1.37                  | 2.43                  | 3.23E-05 |
| Complicated Cataract Surgery                  | 1.66 | 1.21                  | 2.25                  | 0.001478 |
| Charlson Score                                | 1    | 1                     | 1                     | 1        |
| Corneal Arcus/Scarring                        | 1    | 1                     | 1                     | 1        |
| Corneal Edema                                 | 1    | 1                     | 1                     | 1        |
| Diabetes                                      | 1.45 | 1.2                   | 1.74                  | 7.85E-05 |
| Dropped Lens/Retained Fragment                | 1    | 1                     | 1                     | 1        |
| Eye Trauma                                    | 1    | 1                     | 1                     | 1        |
| Fuch's Dystrophy                              | 1    | 1                     | 1                     | 1        |
| Male                                          | 1    | 1                     | 1                     | 1        |
| Glaucoma                                      | 0    | 0                     | 0                     | 0.959292 |
| Hyperopia                                     | 1    | 1                     | 1                     | 1        |
| IFIS/Iris Damage during Surgery               | 1    | 1                     | 1                     | 1        |
| Prior IFIS/Iris Damage                        | 1    | 1                     | 1                     | 1        |
| Intraocular Surgery                           | 1    | 1                     | 1                     | 1        |
| Intravitreal Injection                        | 0.07 | 0                     | 0.34                  | 0.010236 |
| Lens Subluxation                              | 1    | 1                     | 1                     | 1        |
| Myopia                                        | 1    | 1                     | 1                     | 1        |
| Nystagmus                                     | 1    | 1                     | 1                     | 1        |
| Posterior Capsule Tear/Rupture during Surgery | 1    | 1                     | 1                     | 1        |
| Pseudoexfoliation                             | 1.87 | 1.44                  | 2.42                  | 2.39E-06 |
| Race/Ethnicity - Asian                        | 0.89 | 0.66                  | 1.18                  | 0.415354 |
| Race/Ethnicity - Black                        | 1.71 | 1.07                  | 2.65                  | 0.019429 |
| Race/Ethnicity - Hispanic                     | 0.83 | 0.49                  | 1.35                  | 0.484484 |

|                                |      |      |      |          |
|--------------------------------|------|------|------|----------|
| Race/Ethnicity - Other/Unknown | 0.68 | 0.52 | 0.88 | 0.004275 |
| Refractive Surgery             | 4.39 | 3.24 | 5.91 | 5.17E-22 |
| Retinal Detachment/Repair      | 0    | 0    | 0    | 0.967889 |
| Ophthalmic Steroid Use         | 1    | 1    | 1    | 1        |
| Prior Cataract Surgery         | 1    | 1    | 1    | 1        |
| Uveitis                        | 1    | 1    | 1    | 1        |
| Prior Vitrectomy               | 1    | 1    | 1    | 1        |

#### Cystoid Macular Edema

| risk                                  | OR   | Lower Bound<br>95% CI | Upper Bound<br>95% CI | P-value  |
|---------------------------------------|------|-----------------------|-----------------------|----------|
| 40-45 years                           | 0.79 | 0.12                  | 3.08                  | 0.768978 |
| 46-50 years                           | 0.83 | 0.18                  | 2.59                  | 0.769169 |
| 51-55 years                           | 0.87 | 0.28                  | 2.25                  | 0.783245 |
| 56-60 years                           | 0.7  | 0.27                  | 1.6                   | 0.416179 |
| 61-65 years                           | 1.13 | 0.55                  | 2.27                  | 0.726798 |
| 71-75 years                           | 0.98 | 0.55                  | 1.78                  | 0.942536 |
| 76-80 years                           | 0.83 | 0.46                  | 1.52                  | 0.548342 |
| 81-85 years                           | 0.89 | 0.46                  | 1.7                   | 0.714691 |
| 86+ years                             | 1.25 | 0.71                  | 2.27                  | 0.445818 |
| Alpha Blockers                        | 0.98 | 0.49                  | 1.82                  | 0.953371 |
| Anterior Vitrectomy during Surgery    | 1.04 | 0.12                  | 8.67                  | 0.970469 |
| Any Intraoperative Complication       | 4.29 | 0.47                  | 40                    | 0.196245 |
| ARMD                                  | 1.65 | 1.05                  | 2.52                  | 0.025577 |
| Complicated Cataract Surgery          | 1.78 | 1.15                  | 2.71                  | 0.008388 |
| Charlson Score                        | 1.02 | 0.95                  | 1.08                  | 0.633882 |
| Corneal Arcus/Scarring                | 1.74 | 0.96                  | 2.96                  | 0.05182  |
| Corneal Edema                         | 0.94 | 0.27                  | 2.67                  | 0.908783 |
| Diabetes                              | 1.8  | 1.26                  | 2.58                  | 0.001208 |
| Dropped Lens/Retained Fragment        | 0.67 | 0.06                  | 5.06                  | 0.720721 |
| Eye Trauma                            | 0.79 | 0.26                  | 1.89                  | 0.632915 |
| Fuch's Dystrophy                      | 1.77 | 0.49                  | 4.83                  | 0.31707  |
| Male                                  | 1.23 | 0.87                  | 1.72                  | 0.238114 |
| Glaucoma                              | 0.83 | 0.57                  | 1.2                   | 0.33761  |
| Hyperopia                             | 1.62 | 0.86                  | 2.86                  | 0.111779 |
| IFIS/Iris Damage during Surgery       | 0    | 0                     | 6.39E+08              | 0.97644  |
| Prior IFIS/Iris Damage                | 0    | 0                     | 7024926               | 0.980977 |
| Intraocular Surgery                   | 0.76 | 0.35                  | 1.65                  | 0.494493 |
| Intravitreal Injection                | 1.46 | 0.75                  | 2.71                  | 0.247098 |
| Lens Subluxation                      | 0.35 | 0.05                  | 1.25                  | 0.164732 |
| Myopia                                | 1.49 | 0.92                  | 2.34                  | 0.094649 |
| Nystagmus                             | 0.77 | 0.23                  | 1.94                  | 0.621537 |
| Posterior Capsule Tear/Rupture during | 1.05 | 0.09                  | 8.77                  | 0.963172 |

Surgery

|                                |      |      |      |          |
|--------------------------------|------|------|------|----------|
| Pseudoexfoliation              | 1.78 | 1.15 | 2.68 | 0.007645 |
| Race/Ethnicity - Asian         | 0.76 | 0.44 | 1.25 | 0.296103 |
| Race/Ethnicity - Black         | 0.82 | 0.28 | 1.91 | 0.674987 |
| Race/Ethnicity - Hispanic      | 0.76 | 0.3  | 1.63 | 0.518427 |
| Race/Ethnicity - Other/Unknown | 0.91 | 0.56 | 1.44 | 0.710151 |
| Refractive Surgery             | 2.01 | 1.11 | 3.44 | 0.014567 |
| Retinal Detachment/Repair      | 0.85 | 0.51 | 1.4  | 0.542002 |
| Ophthalmic Steroid Use         | 1.22 | 0.68 | 2.13 | 0.487687 |
| Prior Cataract Surgery         | 0.49 | 0.36 | 0.69 | 2.62E-05 |
| Uveitis                        | 2.19 | 1.1  | 4.08 | 0.017822 |
| Prior Vitrectomy               | 2.88 | 1.45 | 5.36 | 0.001457 |

Corneal Edema

| risk                               | OR   | Lower Bound<br>95% CI | Upper Bound<br>95% CI | P-value  |
|------------------------------------|------|-----------------------|-----------------------|----------|
| 40-45 years                        | 1.24 | 0.07                  | 6.47                  | 0.840281 |
| 46-50 years                        | 0    | 0                     | 4165.48               | 0.981419 |
| 51-55 years                        | 1.91 | 0.53                  | 5.66                  | 0.270083 |
| 56-60 years                        | 1.18 | 0.37                  | 3.27                  | 0.757854 |
| 61-65 years                        | 1.04 | 0.36                  | 2.74                  | 0.943458 |
| 71-75 years                        | 0.85 | 0.38                  | 1.95                  | 0.701736 |
| 76-80 years                        | 0.68 | 0.3                   | 1.57                  | 0.35544  |
| 81-85 years                        | 1.73 | 0.82                  | 3.83                  | 0.15743  |
| 86+ years                          | 0.73 | 0.32                  | 1.69                  | 0.458277 |
| Alpha Blockers                     | 1    | 1                     | 1                     | 1        |
| Anterior Vitrectomy during Surgery | 1    | 1                     | 1                     | 1        |
| Any Intraoperative Complication    | 1    | 1                     | 1                     | 1        |
| ARMD                               | 1    | 1                     | 1                     | 1        |
| Complicated Cataract Surgery       | 1    | 1                     | 1                     | 1        |
| Charlson Score                     | 1    | 1                     | 1                     | 1        |
| Corneal Arcus/Scarring             | 1    | 1                     | 1                     | 1        |
| Corneal Edema                      | 1    | 1                     | 1                     | 1        |
| Diabetes                           | 1    | 1                     | 1                     | 1        |
| Dropped Lens/Retained Fragment     | 1    | 1                     | 1                     | 1        |
| Eye Trauma                         | 1    | 1                     | 1                     | 1        |
| Fuch's Dystrophy                   | 1    | 1                     | 1                     | 1        |
| Male                               | 1    | 1                     | 1                     | 1        |
| Glaucoma                           | 1    | 1                     | 1                     | 1        |
| Hyperopia                          | 1    | 1                     | 1                     | 1        |
| IFIS/Iris Damage during Surgery    | 1    | 1                     | 1                     | 1        |
| Prior IFIS/Iris Damage             | 1    | 1                     | 1                     | 1        |
| Intraocular Surgery                | 1    | 1                     | 1                     | 1        |

|                                               |   |   |   |   |
|-----------------------------------------------|---|---|---|---|
| Intravitreal Injection                        | 1 | 1 | 1 | 1 |
| Lens Subluxation                              | 1 | 1 | 1 | 1 |
| Myopia                                        | 1 | 1 | 1 | 1 |
| Nystagmus                                     | 1 | 1 | 1 | 1 |
| Posterior Capsule Tear/Rupture during Surgery | 1 | 1 | 1 | 1 |
| Pseudoexfoliation                             | 1 | 1 | 1 | 1 |
| Race/Ethnicity - Asian                        | 1 | 1 | 1 | 1 |
| Race/Ethnicity - Black                        | 1 | 1 | 1 | 1 |
| Race/Ethnicity - Hispanic                     | 1 | 1 | 1 | 1 |
| Race/Ethnicity - Other/Unknown                | 1 | 1 | 1 | 1 |
| Refractive Surgery                            | 1 | 1 | 1 | 1 |
| Retinal Detachment/Repair                     | 1 | 1 | 1 | 1 |
| Ophthalmic Steroid Use                        | 1 | 1 | 1 | 1 |
| Prior Cataract Surgery                        | 1 | 1 | 1 | 1 |
| Uveitis                                       | 1 | 1 | 1 | 1 |
| Prior Vitrectomy                              | 1 | 1 | 1 | 1 |

Glaucoma/Elevated Intraocular Pressure

| risk                               | OR   | Lower Bound<br>95% CI | Upper Bound<br>95% CI | P-value  |
|------------------------------------|------|-----------------------|-----------------------|----------|
| 40-45 years                        | 1.1  | 0.24                  | 3.56                  | 0.888418 |
| 46-50 years                        | 1.09 | 0.31                  | 2.98                  | 0.879971 |
| 51-55 years                        | 0.42 | 0.1                   | 1.27                  | 0.175745 |
| 56-60 years                        | 0.46 | 0.17                  | 1.09                  | 0.100946 |
| 61-65 years                        | 0.57 | 0.25                  | 1.2                   | 0.155839 |
| 71-75 years                        | 0.71 | 0.4                   | 1.24                  | 0.229008 |
| 76-80 years                        | 1.02 | 0.61                  | 1.72                  | 0.940232 |
| 81-85 years                        | 0.95 | 0.52                  | 1.7                   | 0.854332 |
| 86+ years                          | 0.96 | 0.57                  | 1.66                  | 0.894533 |
| Alpha Blockers                     | 2.14 | 1.16                  | 3.75                  | 0.010311 |
| Anterior Vitrectomy during Surgery | 1.62 | 0.13                  | 16                    | 0.695307 |
| Any Intraoperative Complication    | 5.18 | 0.49                  | 71.11                 | 0.194526 |
| ARMD                               | 1.14 | 0.68                  | 1.84                  | 0.597033 |
| Complicated Cataract Surgery       | 1.54 | 0.94                  | 2.45                  | 0.078101 |
| Charlson Score                     | 0.97 | 0.9                   | 1.03                  | 0.357173 |
| Corneal Arcus/Scarring             | 1.23 | 0.6                   | 2.29                  | 0.548524 |
| Corneal Edema                      | 1.17 | 0.17                  | 4.78                  | 0.844394 |
| Diabetes                           | 1.13 | 0.79                  | 1.61                  | 0.501934 |
| Dropped Lens/Retained Fragment     | 0.44 | 0.02                  | 4.12                  | 0.530204 |
| Eye Trauma                         | 0.83 | 0.19                  | 2.38                  | 0.761794 |
| Fuch's Dystrophy                   | 2.28 | 0.64                  | 6.11                  | 0.142961 |
| Male                               | 0.94 | 0.67                  | 1.3                   | 0.700335 |

|                                               |      |      |      |          |
|-----------------------------------------------|------|------|------|----------|
| Glaucoma                                      | 1    | 1    | 1    | 1        |
| Hyperopia                                     | 0.94 | 0.38 | 1.98 | 0.878438 |
| IFIS/Iris Damage during Surgery               | 0.09 | 0    | 1.41 | 0.125497 |
| Prior IFIS/Iris Damage                        | 0    | 0    | 0.1  | 0.965455 |
| Intraocular Surgery                           | 1.06 | 0.44 | 2.52 | 0.9026   |
| Intravitreal Injection                        | 1.36 | 0.6  | 2.82 | 0.438934 |
| Lens Subluxation                              | 1.01 | 0.15 | 4.11 | 0.98749  |
| Myopia                                        | 1.19 | 0.69 | 1.97 | 0.522185 |
| Nystagmus                                     | 1.01 | 0.34 | 2.39 | 0.980623 |
| Posterior Capsule Tear/Rupture during Surgery | 0.92 | 0.07 | 10.9 | 0.947509 |
| Pseudoexfoliation                             | 1.56 | 0.95 | 2.46 | 0.067611 |
| Race/Ethnicity - Asian                        | 0.82 | 0.47 | 1.36 | 0.475215 |
| Race/Ethnicity - Black                        | 3.23 | 1.64 | 5.91 | 0.000321 |
| Race/Ethnicity - Hispanic                     | 1.24 | 0.53 | 2.53 | 0.592258 |
| Race/Ethnicity - Other/Unknown                | 0.75 | 0.44 | 1.21 | 0.254898 |
| Refractive Surgery                            | 0.77 | 0.31 | 1.6  | 0.520755 |
| Retinal Detachment/Repair                     | 1.02 | 0.59 | 1.74 | 0.935975 |
| Ophthalmic Steroid Use                        | 1.89 | 1.02 | 3.4  | 0.037242 |
| Prior Cataract Surgery                        | 0.7  | 0.51 | 0.96 | 0.028184 |
| Uveitis                                       | 1.36 | 0.48 | 3.22 | 0.521    |
| Prior Vitrectomy                              | 2.38 | 1.08 | 4.86 | 0.023523 |

Any IOL Complication

| risk                               | OR   | Lower Bound<br>95% CI | Upper Bound<br>95% CI | P-value  |
|------------------------------------|------|-----------------------|-----------------------|----------|
| 40-45 years                        | 3.05 | 0.46                  | 12.07                 | 0.15871  |
| 46-50 years                        | 2.02 | 0.31                  | 7.96                  | 0.371248 |
| 51-55 years                        | 1.71 | 0.38                  | 5.79                  | 0.423448 |
| 56-60 years                        | 3.56 | 1.49                  | 8.77                  | 0.004334 |
| 61-65 years                        | 1.9  | 0.74                  | 4.89                  | 0.175905 |
| 71-75 years                        | 1.53 | 0.71                  | 3.56                  | 0.296111 |
| 76-80 years                        | 1.32 | 0.61                  | 3.07                  | 0.495443 |
| 81-85 years                        | 2.23 | 1.02                  | 5.22                  | 0.051309 |
| 86+ years                          | 1.73 | 0.83                  | 3.97                  | 0.164036 |
| Alpha Blockers                     | 1    | 1                     | 1                     | 1        |
| Anterior Vitrectomy during Surgery | 1    | 1                     | 1                     | 1        |
| Any Intraoperative Complication    | 1    | 1                     | 1                     | 1        |
| ARMD                               | 1    | 1                     | 1                     | 1        |
| Complicated Cataract Surgery       | 1    | 1                     | 1                     | 1        |
| Charlson Score                     | 1    | 1                     | 1                     | 1        |
| Corneal Arcus/Scarring             | 1    | 1                     | 1                     | 1        |
| Corneal Edema                      | 1    | 1                     | 1                     | 1        |

|                                               |   |   |   |   |
|-----------------------------------------------|---|---|---|---|
| Diabetes                                      | 1 | 1 | 1 | 1 |
| Dropped Lens/Retained Fragment                | 1 | 1 | 1 | 1 |
| Eye Trauma                                    | 1 | 1 | 1 | 1 |
| Fuch's Dystrophy                              | 1 | 1 | 1 | 1 |
| Male                                          | 1 | 1 | 1 | 1 |
| Glaucoma                                      | 1 | 1 | 1 | 1 |
| Hyperopia                                     | 1 | 1 | 1 | 1 |
| IFIS/Iris Damage during Surgery               | 1 | 1 | 1 | 1 |
| Prior IFIS/Iris Damage                        | 1 | 1 | 1 | 1 |
| Intraocular Surgery                           | 1 | 1 | 1 | 1 |
| Intravitreal Injection                        | 1 | 1 | 1 | 1 |
| Lens Subluxation                              | 1 | 1 | 1 | 1 |
| Myopia                                        | 1 | 1 | 1 | 1 |
| Nystagmus                                     | 1 | 1 | 1 | 1 |
| Posterior Capsule Tear/Rupture during Surgery | 1 | 1 | 1 | 1 |
| Pseudoexfoliation                             | 1 | 1 | 1 | 1 |
| Race/Ethnicity - Asian                        | 1 | 1 | 1 | 1 |
| Race/Ethnicity - Black                        | 1 | 1 | 1 | 1 |
| Race/Ethnicity - Hispanic                     | 1 | 1 | 1 | 1 |
| Race/Ethnicity - Other/Unknown                | 1 | 1 | 1 | 1 |
| Refractive Surgery                            | 1 | 1 | 1 | 1 |
| Retinal Detachment/Repair                     | 1 | 1 | 1 | 1 |
| Ophthalmic Steroid Use                        | 1 | 1 | 1 | 1 |
| Prior Cataract Surgery                        | 1 | 1 | 1 | 1 |
| Uveitis                                       | 1 | 1 | 1 | 1 |
| Prior Vitrectomy                              | 1 | 1 | 1 | 1 |

Lens Subluxation

| risk                               | OR       | Lower Bound<br>95% CI | Upper Bound<br>95% CI | P-value  |
|------------------------------------|----------|-----------------------|-----------------------|----------|
| 40-45 years                        | 0        | 0                     | Inf                   | 0.998891 |
| 46-50 years                        | 0        | 0                     | #####                 | 0.998423 |
| 51-55 years                        | 11.09    | 0.3                   | 494.08                | 0.161931 |
| 56-60 years                        | 12.51    | 0.78                  | 429.53                | 0.09104  |
| 61-65 years                        | 0        | 0                     | 1.59E+92              | 0.995952 |
| 71-75 years                        | 3.1      | 0.2                   | 101.6                 | 0.439538 |
| 76-80 years                        | 5.48     | 0.49                  | 166.36                | 0.218942 |
| 81-85 years                        | 5.48     | 0.49                  | 159.84                | 0.21316  |
| 86+ years                          | 0.05     | 0                     | 3.34                  | 0.198721 |
| Alpha Blockers                     | 9.89     | 1.04                  | 74.81                 | 0.028884 |
| Anterior Vitrectomy during Surgery | 26771.87 | 39.41                 | 92155742              | 0.011185 |
| Any Intraoperative Complication    | 0        | 0                     | 1.91                  | 0.142894 |

|                                               |        |      |          |          |
|-----------------------------------------------|--------|------|----------|----------|
| ARMD                                          | 5.66   | 1.11 | 26.05    | 0.027473 |
| Complicated Cataract Surgery                  | 0.25   | 0.01 | 2.01     | 0.283329 |
| Charlson Score                                | 1.39   | 1.13 | 1.68     | 0.000824 |
| Corneal Arcus/Scarring                        | 0      | 0    | 7.69E+75 | 0.99554  |
| Corneal Edema                                 | 0      | 0    | #####    | 0.998652 |
| Diabetes                                      | 0.22   | 0.04 | 1.08     | 0.082229 |
| Dropped Lens/Retained Fragment                | 179.23 | 2.4  | 53878.72 | 0.026019 |
| Eye Trauma                                    | 0      | 0    | #####    | 0.997865 |
| Fuch's Dystrophy                              | 0      | 0    | Inf      | 0.998684 |
| Male                                          | 0.38   | 0.09 | 1.47     | 0.17851  |
| Glaucoma                                      | 0.75   | 0.13 | 3.17     | 0.714644 |
| Hyperopia                                     | 0      | 0    | #####    | 0.996596 |
| IFIS/Iris Damage during Surgery               | 0      | 0    | Inf      | 0.99911  |
| Prior IFIS/Iris Damage                        | 0      | 0    | #####    | 0.999018 |
| Intraocular Surgery                           | 2.32   | 0.14 | 31.8     | 0.562503 |
| Intravitreal Injection                        | 5.5    | 0.55 | 43.74    | 0.115399 |
| Lens Subluxation                              | 1      | 1    | 1        | 1        |
| Myopia                                        | 1.31   | 0.15 | 8.04     | 0.785969 |
| Nystagmus                                     | 7.43   | 0.33 | 62.9     | 0.101677 |
| Posterior Capsule Tear/Rupture during Surgery | 0      | 0    | Inf      | 0.99878  |
| Pseudoexfoliation                             | 0.47   | 0.02 | 3.59     | 0.539565 |
| Race/Ethnicity - Asian                        | 0.25   | 0.01 | 2.17     | 0.29655  |
| Race/Ethnicity - Black                        | 0      | 0    | #####    | 0.996916 |
| Race/Ethnicity - Hispanic                     | 3.81   | 0.16 | 33.66    | 0.29287  |
| Race/Ethnicity - Other/Unknown                | 0.27   | 0.01 | 2.01     | 0.293494 |
| Refractive Surgery                            | 12.46  | 1.32 | 87.75    | 0.014638 |
| Retinal Detachment/Repair                     | 1.1    | 0.14 | 6.79     | 0.921165 |
| Ophthalmic Steroid Use                        | 0      | 0    | #####    | 0.995844 |
| Prior Cataract Surgery                        | 0.08   | 0.01 | 0.35     | 0.002121 |
| Uveitis                                       | 0      | 0    | #####    | 0.99718  |
| Prior Vitrectomy                              | 3.19   | 0.18 | 41.7     | 0.426102 |

#### Pars Plana Vitrectomy/Lensectomy

| risk        | OR   | Lower Bound<br>95% CI | Upper Bound<br>95% CI | P-value  |
|-------------|------|-----------------------|-----------------------|----------|
| 40-45 years | 6.47 | 2                     | 18.27                 | 0.000726 |
| 46-50 years | 4.24 | 1.32                  | 11.86                 | 0.008447 |
| 51-55 years | 3.82 | 1.46                  | 9.54                  | 0.004448 |
| 56-60 years | 2.16 | 0.87                  | 5.26                  | 0.088792 |
| 61-65 years | 1.9  | 0.81                  | 4.47                  | 0.134089 |
| 71-75 years | 0.98 | 0.45                  | 2.21                  | 0.966497 |
| 76-80 years | 0.68 | 0.3                   | 1.57                  | 0.353432 |

|                                               |      |      |      |          |
|-----------------------------------------------|------|------|------|----------|
| 81-85 years                                   | 1.2  | 0.53 | 2.79 | 0.657466 |
| 86+ years                                     | 1.17 | 0.56 | 2.54 | 0.686375 |
| Alpha Blockers                                | 1    | 1    | 1    | 1        |
| Anterior Vitrectomy during Surgery            | 1    | 1    | 1    | 1        |
| Any Intraoperative Complication               | 1    | 1    | 1    | 1        |
| ARMD                                          | 1    | 1    | 1    | 1        |
| Complicated Cataract Surgery                  | 1    | 1    | 1    | 1        |
| Charlson Score                                | 1    | 1    | 1    | 1        |
| Corneal Arcus/Scarring                        | 1    | 1    | 1    | 1        |
| Corneal Edema                                 | 1    | 1    | 1    | 1        |
| Diabetes                                      | 1    | 1    | 1    | 1        |
| Dropped Lens/Retained Fragment                | 1    | 1    | 1    | 1        |
| Eye Trauma                                    | 1    | 1    | 1    | 1        |
| Fuch's Dystrophy                              | 1    | 1    | 1    | 1        |
| Male                                          | 1    | 1    | 1    | 1        |
| Glaucoma                                      | 1    | 1    | 1    | 1        |
| Hyperopia                                     | 1    | 1    | 1    | 1        |
| IFIS/Iris Damage during Surgery               | 1    | 1    | 1    | 1        |
| Prior IFIS/Iris Damage                        | 1    | 1    | 1    | 1        |
| Intraocular Surgery                           | 1    | 1    | 1    | 1        |
| Intravitreal Injection                        | 1    | 1    | 1    | 1        |
| Lens Subluxation                              | 1    | 1    | 1    | 1        |
| Myopia                                        | 1    | 1    | 1    | 1        |
| Nystagmus                                     | 1    | 1    | 1    | 1        |
| Posterior Capsule Tear/Rupture during Surgery | 1    | 1    | 1    | 1        |
| Pseudoexfoliation                             | 1    | 1    | 1    | 1        |
| Race/Ethnicity - Asian                        | 1    | 1    | 1    | 1        |
| Race/Ethnicity - Black                        | 1    | 1    | 1    | 1        |
| Race/Ethnicity - Hispanic                     | 1    | 1    | 1    | 1        |
| Race/Ethnicity - Other/Unknown                | 1    | 1    | 1    | 1        |
| Refractive Surgery                            | 1    | 1    | 1    | 1        |
| Retinal Detachment/Repair                     | 1    | 1    | 1    | 1        |
| Ophthalmic Steroid Use                        | 1    | 1    | 1    | 1        |
| Prior Cataract Surgery                        | 1    | 1    | 1    | 1        |
| Uveitis                                       | 1    | 1    | 1    | 1        |
| Prior Vitrectomy                              | 1    | 1    | 1    | 1        |

PCO/YAG Capsulotomy

| risk        | OR   | Lower Bound<br>95% CI | Upper Bound<br>95% CI | P-value  |
|-------------|------|-----------------------|-----------------------|----------|
| 40-45 years | 5.83 | 3.09                  | 10.56                 | 1.51E-08 |
| 46-50 years | 2.38 | 1.2                   | 4.41                  | 0.008755 |



|                                               |      |      |      |          |
|-----------------------------------------------|------|------|------|----------|
| 51-55 years                                   | 2.17 | 1.25 | 3.64 | 0.004537 |
| 56-60 years                                   | 1.54 | 0.97 | 2.42 | 0.060586 |
| 61-65 years                                   | 2.11 | 1.43 | 3.13 | 0.000178 |
| 71-75 years                                   | 0.75 | 0.52 | 1.1  | 0.135274 |
| 76-80 years                                   | 0.73 | 0.51 | 1.06 | 0.095315 |
| 81-85 years                                   | 0.74 | 0.48 | 1.12 | 0.157128 |
| 86+ years                                     | 0.48 | 0.31 | 0.73 | 0.000654 |
| Alpha Blockers                                | 1    | 1    | 1    | 1        |
| Anterior Vitrectomy during Surgery            | 1    | 1    | 1    | 1        |
| Any Intraoperative Complication               | 1    | 1    | 1    | 1        |
| ARMD                                          | 1    | 1    | 1    | 1        |
| Complicated Cataract Surgery                  | 1    | 1    | 1    | 1        |
| Charlson Score                                | 1    | 1    | 1    | 1        |
| Corneal Arcus/Scarring                        | 1    | 1    | 1    | 1        |
| Corneal Edema                                 | 1    | 1    | 1    | 1        |
| Diabetes                                      | 1    | 1    | 1    | 1        |
| Dropped Lens/Retained Fragment                | 1    | 1    | 1    | 1        |
| Eye Trauma                                    | 1    | 1    | 1    | 1        |
| Fuch's Dystrophy                              | 1    | 1    | 1    | 1        |
| Male                                          | 1    | 1    | 1    | 1        |
| Glaucoma                                      | 1    | 1    | 1    | 1        |
| Hyperopia                                     | 1    | 1    | 1    | 1        |
| IFIS/Iris Damage during Surgery               | 1    | 1    | 1    | 1        |
| Prior IFIS/Iris Damage                        | 1    | 1    | 1    | 1        |
| Intraocular Surgery                           | 1    | 1    | 1    | 1        |
| Intravitreal Injection                        | 1    | 1    | 1    | 1        |
| Lens Subluxation                              | 1    | 1    | 1    | 1        |
| Myopia                                        | 1    | 1    | 1    | 1        |
| Nystagmus                                     | 1    | 1    | 1    | 1        |
| Posterior Capsule Tear/Rupture during Surgery | 1    | 1    | 1    | 1        |
| Pseudoexfoliation                             | 4.13 | 3.29 | 5.17 | 4.28E-35 |
| Race/Ethnicity - Asian                        | 1    | 1    | 1    | 1        |
| Race/Ethnicity - Black                        | 1    | 1    | 1    | 1        |
| Race/Ethnicity - Hispanic                     | 1    | 1    | 1    | 1        |
| Race/Ethnicity - Other/Unknown                | 1    | 1    | 1    | 1        |
| Refractive Surgery                            | 1    | 1    | 1    | 1        |
| Retinal Detachment/Repair                     | 1    | 1    | 1    | 1        |
| Ophthalmic Steroid Use                        | 1    | 1    | 1    | 1        |
| Prior Cataract Surgery                        | 1    | 1    | 1    | 1        |
| Uveitis                                       | 1    | 1    | 1    | 1        |
| Prior Vitrectomy                              | 1    | 1    | 1    | 1        |

Any Posterior Complication

| risk                                          | OR   | Lower Bound<br>95% CI | Upper Bound<br>95% CI | P-value  |
|-----------------------------------------------|------|-----------------------|-----------------------|----------|
| 40-45 years                                   | 1.2  | 0.28                  | 3.43                  | 0.769656 |
| 46-50 years                                   | 1.06 | 0.31                  | 2.73                  | 0.908322 |
| 51-55 years                                   | 1.21 | 0.51                  | 2.52                  | 0.636185 |
| 56-60 years                                   | 0.3  | 0.09                  | 0.76                  | 0.023819 |
| 61-65 years                                   | 0.94 | 0.51                  | 1.68                  | 0.840977 |
| 71-75 years                                   | 0.84 | 0.53                  | 1.35                  | 0.47506  |
| 76-80 years                                   | 0.82 | 0.52                  | 1.3                   | 0.390362 |
| 81-85 years                                   | 0.94 | 0.56                  | 1.55                  | 0.803262 |
| 86+ years                                     | 1.05 | 0.68                  | 1.64                  | 0.818824 |
| Alpha Blockers                                | 1    | 1                     | 1                     | 1        |
| Anterior Vitrectomy during Surgery            | 1    | 1                     | 1                     | 1        |
| Any Intraoperative Complication               | 1    | 1                     | 1                     | 1        |
| ARMD                                          | 1    | 1                     | 1                     | 1        |
| Complicated Cataract Surgery                  | 1    | 1                     | 1                     | 1        |
| Charlson Score                                | 1    | 1                     | 1                     | 1        |
| Corneal Arcus/Scarring                        | 1    | 1                     | 1                     | 1        |
| Corneal Edema                                 | 1    | 1                     | 1                     | 1        |
| Diabetes                                      | 1    | 1                     | 1                     | 1        |
| Dropped Lens/Retained Fragment                | 1    | 1                     | 1                     | 1        |
| Eye Trauma                                    | 1    | 1                     | 1                     | 1        |
| Fuch's Dystrophy                              | 1    | 1                     | 1                     | 1        |
| Male                                          | 1    | 1                     | 1                     | 1        |
| Glaucoma                                      | 1    | 1                     | 1                     | 1        |
| Hyperopia                                     | 1    | 1                     | 1                     | 1        |
| IFIS/Iris Damage during Surgery               | 1    | 1                     | 1                     | 1        |
| Prior IFIS/Iris Damage                        | 1    | 1                     | 1                     | 1        |
| Intraocular Surgery                           | 1    | 1                     | 1                     | 1        |
| Intravitreal Injection                        | 1    | 1                     | 1                     | 1        |
| Lens Subluxation                              | 1    | 1                     | 1                     | 1        |
| Myopia                                        | 1    | 1                     | 1                     | 1        |
| Nystagmus                                     | 1    | 1                     | 1                     | 1        |
| Posterior Capsule Tear/Rupture during Surgery | 1    | 1                     | 1                     | 1        |
| Pseudoexfoliation                             | 1    | 1                     | 1                     | 1        |
| Race/Ethnicity - Asian                        | 1    | 1                     | 1                     | 1        |
| Race/Ethnicity - Black                        | 1    | 1                     | 1                     | 1        |
| Race/Ethnicity - Hispanic                     | 1    | 1                     | 1                     | 1        |
| Race/Ethnicity - Other/Unknown                | 1    | 1                     | 1                     | 1        |
| Refractive Surgery                            | 1    | 1                     | 1                     | 1        |
| Retinal Detachment/Repair                     | 1    | 1                     | 1                     | 1        |

|                        |   |   |   |   |
|------------------------|---|---|---|---|
| Ophthalmic Steroid Use | 1 | 1 | 1 | 1 |
| Prior Cataract Surgery | 1 | 1 | 1 | 1 |
| Uveitis                | 1 | 1 | 1 | 1 |
| Prior Vitrectomy       | 1 | 1 | 1 | 1 |

### Refractive Surgery

| risk                                          | OR   | Lower Bound<br>95% CI | Upper Bound<br>95% CI | P-value  |
|-----------------------------------------------|------|-----------------------|-----------------------|----------|
| 40-45 years                                   | 1.16 | 0.26                  | 3.52                  | 0.813219 |
| 46-50 years                                   | 0.65 | 0.15                  | 1.86                  | 0.48044  |
| 51-55 years                                   | 0.86 | 0.34                  | 1.89                  | 0.734488 |
| 56-60 years                                   | 0.64 | 0.29                  | 1.28                  | 0.232395 |
| 61-65 years                                   | 0.71 | 0.38                  | 1.26                  | 0.254144 |
| 71-75 years                                   | 0.7  | 0.45                  | 1.1                   | 0.121126 |
| 76-80 years                                   | 0.9  | 0.6                   | 1.36                  | 0.598062 |
| 81-85 years                                   | 1.03 | 0.66                  | 1.62                  | 0.898955 |
| 86+ years                                     | 0.66 | 0.42                  | 1.01                  | 0.056302 |
| Alpha Blockers                                | 1.29 | 0.72                  | 2.18                  | 0.360634 |
| Anterior Vitrectomy during Surgery            | 0.59 | 0.08                  | 3.74                  | 0.578473 |
| Any Intraoperative Complication               | 2.82 | 0.36                  | 23.05                 | 0.319897 |
| ARMD                                          | 1.3  | 0.85                  | 1.94                  | 0.207325 |
| Complicated Cataract Surgery                  | 1.34 | 0.85                  | 2.05                  | 0.185591 |
| Charlson Score                                | 0.97 | 0.91                  | 1.03                  | 0.348606 |
| Corneal Arcus/Scarring                        | 1.96 | 1.15                  | 3.16                  | 0.008783 |
| Corneal Edema                                 | 3.92 | 1.44                  | 9.5                   | 0.004117 |
| Diabetes                                      | 1.35 | 1.02                  | 1.79                  | 0.036357 |
| Dropped Lens/Retained Fragment                | 0.41 | 0.02                  | 4.08                  | 0.492655 |
| Eye Trauma                                    | 1.18 | 0.46                  | 2.55                  | 0.707359 |
| Fuch's Dystrophy                              | 3.51 | 1.53                  | 7.2                   | 0.001281 |
| Male                                          | 1.09 | 0.85                  | 1.41                  | 0.48584  |
| Glaucoma                                      | 1    | 0.72                  | 1.36                  | 0.990054 |
| Hyperopia                                     | 0.18 | 0.03                  | 0.59                  | 0.019027 |
| IFIS/Iris Damage during Surgery               | 0    | 0                     | 0                     | 0.965368 |
| Prior IFIS/Iris Damage                        | 1    | 0.05                  | 5.6                   | 0.998349 |
| Intraocular Surgery                           | 0.73 | 0.28                  | 1.8                   | 0.50535  |
| Intravitreal Injection                        | 1.53 | 0.7                   | 3.07                  | 0.253339 |
| Lens Subluxation                              | 1.32 | 0.35                  | 3.96                  | 0.643582 |
| Myopia                                        | 0.72 | 0.41                  | 1.21                  | 0.238155 |
| Nystagmus                                     | 1.08 | 0.44                  | 2.25                  | 0.857857 |
| Posterior Capsule Tear/Rupture during Surgery | 5.97 | 0.86                  | 59.54                 | 0.087549 |
| Pseudoexfoliation                             | 0.14 | 0.06                  | 0.3                   | 4.19E-06 |
| Race/Ethnicity - Asian                        | 0.33 | 0.17                  | 0.58                  | 0.000463 |

|                                |      |      |      |          |
|--------------------------------|------|------|------|----------|
| Race/Ethnicity - Black         | 0.22 | 0.04 | 0.7  | 0.035557 |
| Race/Ethnicity - Hispanic      | 1.04 | 0.53 | 1.87 | 0.895216 |
| Race/Ethnicity - Other/Unknown | 0.77 | 0.52 | 1.1  | 0.169593 |
| Refractive Surgery             | 1    | 1    | 1    | 1        |
| Retinal Detachment/Repair      | 0.9  | 0.53 | 1.49 | 0.69421  |
| Ophthalmic Steroid Use         | 0.31 | 0.11 | 0.69 | 0.009168 |
| Prior Cataract Surgery         | 1.12 | 0.86 | 1.47 | 0.413662 |
| Uveitis                        | 0.71 | 0.28 | 1.57 | 0.441548 |
| Prior Vitrectomy               | 1.05 | 0.46 | 2.19 | 0.893484 |

#### Retinal Detachment/Repair

| risk                               | OR   | Lower Bound<br>95% CI | Upper Bound<br>95% CI | P-value  |
|------------------------------------|------|-----------------------|-----------------------|----------|
| 40-45 years                        | 2.41 | 0.37                  | 8.8                   | 0.250138 |
| 46-50 years                        | 0    | 0                     | 1.96                  | 0.974302 |
| 51-55 years                        | 2.21 | 0.78                  | 5.46                  | 0.103174 |
| 56-60 years                        | 0.77 | 0.22                  | 2.11                  | 0.639589 |
| 61-65 years                        | 1.3  | 0.56                  | 2.85                  | 0.520426 |
| 71-75 years                        | 0.9  | 0.47                  | 1.78                  | 0.767198 |
| 76-80 years                        | 0.68 | 0.34                  | 1.35                  | 0.262197 |
| 81-85 years                        | 0.89 | 0.42                  | 1.86                  | 0.755563 |
| 86+ years                          | 0.7  | 0.35                  | 1.39                  | 0.295223 |
| Alpha Blockers                     | 1    | 1                     | 1                     | 1        |
| Anterior Vitrectomy during Surgery | 1    | 1                     | 1                     | 1        |
| Any Intraoperative Complication    | 1    | 1                     | 1                     | 1        |
| ARMD                               | 1    | 1                     | 1                     | 1        |
| Complicated Cataract Surgery       | 1    | 1                     | 1                     | 1        |
| Charlson Score                     | 1    | 1                     | 1                     | 1        |
| Corneal Arcus/Scarring             | 1    | 1                     | 1                     | 1        |
| Corneal Edema                      | 1    | 1                     | 1                     | 1        |
| Diabetes                           | 1    | 1                     | 1                     | 1        |
| Dropped Lens/Retained Fragment     | 1    | 1                     | 1                     | 1        |
| Eye Trauma                         | 1    | 1                     | 1                     | 1        |
| Fuch's Dystrophy                   | 1    | 1                     | 1                     | 1        |
| Male                               | 1    | 1                     | 1                     | 1        |
| Glaucoma                           | 1    | 1                     | 1                     | 1        |
| Hyperopia                          | 1    | 1                     | 1                     | 1        |
| IFIS/Iris Damage during Surgery    | 1    | 1                     | 1                     | 1        |
| Prior IFIS/Iris Damage             | 1    | 1                     | 1                     | 1        |
| Intraocular Surgery                | 1    | 1                     | 1                     | 1        |
| Intravitreal Injection             | 1    | 1                     | 1                     | 1        |
| Lens Subluxation                   | 1    | 1                     | 1                     | 1        |
| Myopia                             | 1    | 1                     | 1                     | 1        |

|                                               |   |   |   |   |
|-----------------------------------------------|---|---|---|---|
| Nystagmus                                     | 1 | 1 | 1 | 1 |
| Posterior Capsule Tear/Rupture during Surgery | 1 | 1 | 1 | 1 |
| Pseudoexfoliation                             | 1 | 1 | 1 | 1 |
| Race/Ethnicity - Asian                        | 1 | 1 | 1 | 1 |
| Race/Ethnicity - Black                        | 1 | 1 | 1 | 1 |
| Race/Ethnicity - Hispanic                     | 1 | 1 | 1 | 1 |
| Race/Ethnicity - Other/Unknown                | 1 | 1 | 1 | 1 |
| Refractive Surgery                            | 1 | 1 | 1 | 1 |
| Retinal Detachment/Repair                     | 1 | 1 | 1 | 1 |
| Ophthalmic Steroid Use                        | 1 | 1 | 1 | 1 |
| Prior Cataract Surgery                        | 1 | 1 | 1 | 1 |
| Uveitis                                       | 1 | 1 | 1 | 1 |
| Prior Vitrectomy                              | 1 | 1 | 1 | 1 |

Vitreous Tap/Endophthalmitis

| risk                               | OR   | Lower Bound<br>95% CI | Upper Bound<br>95% CI | P-value  |
|------------------------------------|------|-----------------------|-----------------------|----------|
| 40-45 years                        | 0.52 | 0.02                  | 3.51                  | 0.583334 |
| 46-50 years                        | 1.63 | 0.34                  | 5.68                  | 0.486123 |
| 51-55 years                        | 0.62 | 0.09                  | 2.48                  | 0.554979 |
| 56-60 years                        | 0.41 | 0.09                  | 1.38                  | 0.19164  |
| 61-65 years                        | 1.56 | 0.66                  | 3.6                   | 0.298886 |
| 71-75 years                        | 0.63 | 0.27                  | 1.42                  | 0.257643 |
| 76-80 years                        | 0.79 | 0.37                  | 1.7                   | 0.5295   |
| 81-85 years                        | 0.53 | 0.2                   | 1.3                   | 0.172451 |
| 86+ years                          | 0.53 | 0.22                  | 1.26                  | 0.152033 |
| Alpha Blockers                     | 1.23 | 0.49                  | 2.73                  | 0.631616 |
| Anterior Vitrectomy during Surgery | 0.84 | 0.06                  | 10.6                  | 0.892112 |
| Any Intraoperative Complication    | 9.78 | 0.69                  | 151.72                | 0.091066 |
| ARMD                               | 2.48 | 1.36                  | 4.36                  | 0.002186 |
| Complicated Cataract Surgery       | 2.16 | 1.19                  | 3.77                  | 0.008754 |
| Charlson Score                     | 0.98 | 0.88                  | 1.07                  | 0.674316 |
| Corneal Arcus/Scarring             | 2.17 | 1                     | 4.34                  | 0.038016 |
| Corneal Edema                      | 2.27 | 0.68                  | 6.6                   | 0.152437 |
| Diabetes                           | 1.91 | 1.15                  | 3.17                  | 0.012149 |
| Dropped Lens/Retained Fragment     | 0.57 | 0.03                  | 6.37                  | 0.67679  |
| Eye Trauma                         | 0.43 | 0.06                  | 1.63                  | 0.291294 |
| Fuch's Dystrophy                   | 6.63 | 2.13                  | 17.36                 | 0.000353 |
| Male                               | 1.22 | 0.75                  | 1.96                  | 0.419896 |
| Glaucoma                           | 0.78 | 0.46                  | 1.3                   | 0.359241 |
| Hyperopia                          | 1.32 | 0.54                  | 2.86                  | 0.516341 |
| IFIS/Iris Damage during Surgery    | 0    | 0                     | 8.3                   | 0.975514 |

|                                               |      |      |       |          |
|-----------------------------------------------|------|------|-------|----------|
| Prior IFIS/Iris Damage                        | 2.5  | 0.13 | 14.55 | 0.40165  |
| Intraocular Surgery                           | 4.96 | 1.66 | 14.28 | 0.003746 |
| Intravitreal Injection                        | 0.4  | 0.11 | 1.12  | 0.111813 |
| Lens Subluxation                              | 1.29 | 0.34 | 4.04  | 0.677567 |
| Myopia                                        | 0.47 | 0.2  | 0.96  | 0.053616 |
| Nystagmus                                     | 0.74 | 0.12 | 2.58  | 0.693229 |
| Posterior Capsule Tear/Rupture during Surgery | 0.56 | 0.02 | 6.52  | 0.66596  |
| Pseudoexfoliation                             | 2.44 | 1.39 | 4.17  | 0.001389 |
| Race/Ethnicity - Asian                        | 1.29 | 0.66 | 2.38  | 0.425987 |
| Race/Ethnicity - Black                        | 2.02 | 0.66 | 5.03  | 0.168374 |
| Race/Ethnicity - Hispanic                     | 0.93 | 0.26 | 2.48  | 0.891007 |
| Race/Ethnicity - Other/Unknown                | 0.91 | 0.43 | 1.77  | 0.797667 |
| Refractive Surgery                            | 0.96 | 0.31 | 2.4   | 0.933792 |
| Retinal Detachment/Repair                     | 1.04 | 0.51 | 2.02  | 0.919057 |
| Ophthalmic Steroid Use                        | 1.06 | 0.44 | 2.33  | 0.887972 |
| Prior Cataract Surgery                        | 0.51 | 0.32 | 0.81  | 0.004663 |
| Uveitis                                       | 2.08 | 0.79 | 4.81  | 0.108216 |
| Prior Vitrectomy                              | 0.72 | 0.22 | 2.12  | 0.564831 |

#### Wound Dehiscence

| risk                               | OR    | Lower Bound<br>95% CI | Upper Bound<br>95% CI | P-value  |
|------------------------------------|-------|-----------------------|-----------------------|----------|
| 40-45 years                        | 0     | 0                     | 1.12E+23              | 0.9925   |
| 46-50 years                        | 2.25  | 0.3                   | 10.89                 | 0.354464 |
| 51-55 years                        | 0.64  | 0.03                  | 4.29                  | 0.694047 |
| 56-60 years                        | 1.13  | 0.23                  | 4.53                  | 0.866034 |
| 61-65 years                        | 1.08  | 0.26                  | 3.9                   | 0.913493 |
| 71-75 years                        | 0.96  | 0.32                  | 3                     | 0.944094 |
| 76-80 years                        | 0.81  | 0.26                  | 2.59                  | 0.708453 |
| 81-85 years                        | 0.62  | 0.15                  | 2.32                  | 0.486657 |
| 86+ years                          | 0.46  | 0.11                  | 1.71                  | 0.25203  |
| Alpha Blockers                     | 0.49  | 0.03                  | 2.68                  | 0.506479 |
| Anterior Vitrectomy during Surgery | 83.72 | 1.05                  | 4920.27               | 0.041269 |
| Any Intraoperative Complication    | 0.05  | 0                     | 4.92                  | 0.194702 |
| ARMD                               | 1.88  | 0.7                   | 4.44                  | 0.17644  |
| Complicated Cataract Surgery       | 3.21  | 1.4                   | 6.89                  | 0.003801 |
| Charlson Score                     | 0.9   | 0.71                  | 1.06                  | 0.286239 |
| Corneal Arcus/Scarring             | 0.96  | 0.19                  | 3.33                  | 0.95296  |
| Corneal Edema                      | 0.55  | 0.02                  | 4.38                  | 0.629579 |
| Diabetes                           | 2.01  | 0.99                  | 4.06                  | 0.050813 |
| Dropped Lens/Retained Fragment     | 8.47  | 0.28                  | 127.42                | 0.139608 |
| Eye Trauma                         | 2.05  | 0.42                  | 6.87                  | 0.298531 |

|                                               |      |      |          |          |
|-----------------------------------------------|------|------|----------|----------|
| Fuch's Dystrophy                              | 0    | 0    | 1.01E+26 | 0.993353 |
| Male                                          | 0.59 | 0.28 | 1.2      | 0.161106 |
| Glaucoma                                      | 0.91 | 0.4  | 1.92     | 0.811495 |
| Hyperopia                                     | 0.4  | 0.02 | 2        | 0.375163 |
| IFIS/Iris Damage during Surgery               | 0    | 0    | 6.03E+31 | 0.994217 |
| Prior IFIS/Iris Damage                        | 0    | 0    | 4.70E+46 | 0.995375 |
| Intraocular Surgery                           | 1.26 | 0.12 | 8.38     | 0.83384  |
| Intravitreal Injection                        | 1    | 0.14 | 4.26     | 0.997644 |
| Lens Subluxation                              | 5.72 | 0.71 | 30.25    | 0.059528 |
| Myopia                                        | 0.83 | 0.27 | 2.19     | 0.724343 |
| Nystagmus                                     | 0    | 0    | 8.13E+17 | 0.98996  |
| Posterior Capsule Tear/Rupture during Surgery | 0    | 0    | #####    | 0.994239 |
| Pseudoexfoliation                             | 0.68 | 0.19 | 1.84     | 0.491904 |
| Race/Ethnicity - Asian                        | 0.83 | 0.26 | 2.17     | 0.728551 |
| Race/Ethnicity - Black                        | 1.96 | 0.43 | 6.3      | 0.311931 |
| Race/Ethnicity - Hispanic                     | 0.35 | 0.02 | 2        | 0.342985 |
| Race/Ethnicity - Other/Unknown                | 0.78 | 0.22 | 2.08     | 0.65611  |
| Refractive Surgery                            | 2.16 | 0.6  | 5.93     | 0.175871 |
| Retinal Detachment/Repair                     | 1.17 | 0.38 | 3.18     | 0.773617 |
| Ophthalmic Steroid Use                        | 0.62 | 0.13 | 2.11     | 0.489086 |
| Prior Cataract Surgery                        | 0.93 | 0.48 | 1.91     | 0.844895 |
| Uveitis                                       | 6.2  | 2.2  | 15.23    | 0.000181 |
| Prior Vitrectomy                              | 0.2  | 0.02 | 1.43     | 0.155114 |
